# Supplementary material
Source: publisher figshare collection journal article supplement (https://acs.figshare.com/ndownloader/files/20168453)
Supplement: Supplementary file 1 [file 20168453]

## Sheet: Identified Protein Groups
Protein IDs (Integrated Gene Catalog IDs)	Protein Class	Peptides_F1_NO_ABP	Peptides_F1_PLUS_ABP	Peptides_F2_NO_ABP	Peptides_F2_PLUS_ABP	Peptides_M1_NO_ABP	Peptides_M1_PLUS_ABP	Peptides_M2_NO_ABP	Peptides_M2_PLUS_ABP	Razor + Unique Peptides_F1_NO_ABP	Razor + Unique Peptides_F1_PLUS_ABP	Razor + Unique Peptides_F2_NO_ABP	Razor + Unique Peptides_F2_PLUS_ABP	Razor + Unique Peptides_M1_NO_ABP	Razor + Unique Peptides_M2_NO_ABP	Razor + Unique Peptides_M1_PLUS_ABP	Razor + Unique Peptides_M2_PLUS_ABP	Unique Peptides_F1_NO_ABP	Unique Peptides_F1_PLUS_ABP	Unique Peptides_F2_NO_ABP	Unique Peptides_F2_PLUS_ABP	Unique Peptides_M1_NO_ABP	Unique Peptides_M1_PLUS_ABP	Unique Peptides_M2_NO_ABP	Unique Peptides_M2_PLUS_ABP	LFQ Intensity_F1_NO_ABP	LFQ Intensity_F1_PLUS_ABP	LFQ Intensity_F2_NO_ABP	LFQ Intensity_F2_PLUS_ABP	LFQ Intensity_M1_NO_ABP	LFQ Intensity_M1_PLUS_ABP	LFQ Intensity_M2_NO_ABP	LFQ Intensity_M2_PLUS_ABP	Loop Classification	Glucosidase Type
411460.RUMTOR_01268	Other Bacterial GH Protein	0	1	0	0	0	0	0	0	0	1	0	0	0	0	0	0	0	1	0	0	0	0	0	0	0	0	0	0	0	0	0	0
411474.COPEUT_01183	Bacterial Non-GH Protein	3	1	2	2	1	1	1	1	1	0	1	0	0	0	0	0	1	0	1	0	0	0	0	0	0	0	1830800	0	0	0	0	0
N088A_GL0014947;T2D-31A_GL0097458;O2.UC32-2_GL0117801;411484.CLOSS21_01204	Bacterial Non-GH Protein	0	0	0	1	1	1	1	1	0	0	0	1	1	1	1	1	0	0	0	1	1	1	1	1	0	0	0	0	391280000	134320000	0	0
CON__Streptavidin	Contaminant - Streptavidin	6	4	6	6	6	5	6	5	6	4	6	6	6	6	5	5	6	4	6	6	6	5	6	5	603570000000	298140000000	692330000000	262210000000	591990000000	427170000000	583490000000	267420000000
T2D-135A_GL0050700;457395.BSBG_00304	Bacterial Non-GH Protein	3	3	2	4	1	1	6	6	1	1	0	0	0	1	0	1	0	0	0	0	0	0	0	0	0	0	0	0	0	0	0	6559700
457421.CBFG_05437;V1.FI33_GL0111667;T2D-19A_GL0100151	Bacterial Non-GH Protein	7	9	14	14	12	14	14	13	1	2	2	1	2	3	3	3	0	0	0	0	0	0	0	0	0	0	0	0	0	0	0	12473000
MH0100_GL0121700;470146.COPCOM_01474;MH0212_GL0025814	Bacterial Non-GH Protein	4	4	4	5	2	3	4	4	0	0	0	1	1	0	1	0	0	0	0	1	1	1	0	0	0	0	0	0	0	6702800	0	0
470146.COPCOM_03190	Bacterial Non-GH Protein	2	1	2	2	2	1	0	0	2	1	2	2	2	0	1	0	2	1	2	2	2	1	0	0	11537000	0	14499000	9362500	38935000	0	0	0
483215.BACFIN_08570;MH0189_GL0032648;MH0100_GL0014765;T2D-22A_GL0084238;MH0298_GL0068193;MH0006_GL0026184;MH0222_GL0125575;O2.UC31-1_GL0143343;MH0124_GL0038514;MH0047_GL0028365;MH0415_GL0041040;MH0047_GL0003468;T2D-112A_GL0060465;MH0447_GL0134431;MH0006_GL0079771;T2D-73A_GL0014008;V1.FI17_GL0140592;MH0175_GL0110314;MH0438_GL0136823;MH0430_GL0083691;MH0361_GL0001951;MH0318_GL0149845;MH0355_GL01127…	Bacterial Non-GH Protein	14	15	14	15	10	12	14	13	0	1	1	1	1	1	0	1	0	0	0	0	0	0	0	0	0	0	0	0	0	0	0	17893000
T2D-11A_GL0030436;V1.UC50-1_GL0029255;552398.HMPREF0866_02480;MH0378_GL0112540;MH0318_GL0109203;MH0367_GL0156320;V1.FI08_GL0009107;MH0323_GL0127392;MH0229_GL0177270;MH0012_GL0148859;MH0006_GL0006623;V1.FI17_GL0174983;MH0318_GL0186980;O2.UC49-0_GL0034758	Bacterial Non-GH Protein	1	1	0	0	2	1	2	1	1	1	0	0	1	1	0	1	1	1	0	0	1	0	1	1	0	0	0	0	0	0	0	5556100
T2D-62A_GL0000714;T2D-62A_GL0014831;O2.UC26-1_GL0038288;V1.CD7-4_GL0032889;T2D-31A_GL0076723;556261.HMPREF0240_02573;V1.CD7-0_GL0021507;O2.UC23-2_GL0106026;MH0423_GL0108487;MH0338_GL0122858;T2D-108A_GL0065269;MH0421_GL0167191;MH0338_GL0122860;MH0153_GL0130149;MH0130_GL0049518;MH0054_GL0043475;T2D-108A_GL0021259;MH0423_GL0108489;MH0268_GL0113888;MH0130_GL0049516;MH0054_GL0043473;MH0406_GL0117392;S…	Bacterial Non-GH Protein	3	3	3	3	3	2	2	2	1	1	1	1	1	0	0	0	1	1	1	1	1	0	0	0	0	0	0	0	1593900	0	0	0
585054.EFER_0954;O2.UC23-0_GL0009332	Bacterial Non-GH Protein	0	1	1	1	1	1	1	1	0	1	1	1	1	1	1	1	0	1	1	1	1	1	1	1	0	0	0	0	0	0	0	3871600
MH0198_GL0156241;657314.CK5_22290	Bacterial Non-GH Protein	0	0	0	2	1	2	0	0	0	0	0	1	1	0	1	0	0	0	0	1	1	1	0	0	0	0	0	0	0	10580000	0	0
MH0221_GL0053056;V1.UC55-0_GL0102614;MH0325_GL0053355;V1.UC13-0_GL0047185;DOF004_GL0063466	Glucuronidase	0	3	3	6	2	7	1	7	0	0	0	0	0	0	1	1	0	0	0	0	0	1	0	0	0	0	0	0	0	2166200	0	0	Loop 1
CON__P00761	Contaminant - Other	7	7	7	7	7	8	6	6	7	7	7	7	7	6	8	6	7	7	7	7	7	8	6	6	40789000000	33050000000	77925000000	65120000000	72130000000	84887000000	77609000000	37375000000
679189.HMPREF9019_1341;ED12A_GL0070085;MH0063_GL0030919	Bacterial Non-GH Protein	6	4	7	8	6	7	8	7	0	0	0	0	0	1	0	1	0	0	0	0	0	0	1	1	0	0	0	0	0	0	0	18964000
O2.UC2-2_GL0069611;MH0236_GL0059893;MH0297_GL0081258;V1.UC52-0_GL0002467;V1.CD48-0_GL0131198;V1.UC57-0_GL0153004;V1.FI11_GL0026640	Glucosidase	1	45	1	37	1	17	0	24	1	45	1	37	1	0	17	24	0	25	1	18	1	3	0	10	0	16800000000	0	3899200000	0	340550000	0	400930000		Type 1
742723.HMPREF9477_01038	Bacterial Non-GH Protein	4	6	5	7	4	5	5	4	0	0	1	1	0	1	0	0	0	0	1	1	0	0	1	0	0	0	0	0	0	0	89876000	0
sp|P01717|LV325_HUMAN;sp|P01718|LV327_HUMAN;sp|A0A075B6K0|LV316_HUMAN;A0A075B6K0;P01717;P01718	Other Human Protein	1	0	1	1	1	1	0	0	1	0	1	1	1	0	1	0	1	0	1	1	1	1	0	0	0	0	0	0	0	10103000	0	0
sp|P06310|KV230_HUMAN;sp|P01615|KVD28_HUMAN;sp|A0A0A0MRZ7|KVD26_HUMAN;sp|A0A075B6S6|KVD30_HUMAN;sp|A0A075B6S2|KVD29_HUMAN;sp|A0A075B6P5|KV228_HUMAN;A0A0A0MRZ7;A0A075B6S6;A0A075B6S2;A0A075B6P5;sp|P01614|KVD40_HUMAN;sp|A0A087WW87|KV240_HUMAN;A0A087WW87;P06310;P01615;P01614	Other Human Protein	1	1	1	1	1	1	1	1	1	1	1	1	1	1	1	1	1	1	1	1	1	1	1	1	0	0	0	0	0	0	0	298640000
sp|A0A087WSY6|KVD15_HUMAN;A0A087WSY6	Other Human Protein	1	1	1	1	1	1	1	1	1	1	1	1	1	1	1	1	1	1	1	1	1	1	1	1	0	0	0	0	0	0	0	5936200
sp|P04433|KV311_HUMAN;sp|A0A0A0MRZ8|KVD11_HUMAN;A0A0A0MRZ8;P04433	Other Human Protein	1	1	2	2	2	2	2	2	1	1	2	2	2	2	2	2	1	1	2	2	2	2	2	2	0	0	137510000	182760000	84098000	89307000	75006000	68222000
sp|A0A0A0MS15|HV349_HUMAN;A0A0A0MS15	Other Human Protein	0	1	1	2	0	1	0	0	0	1	1	2	0	0	1	0	0	1	1	2	0	1	0	0	0	0	0	9918900	0	0	0	0
sp|A0A0A0MT36|KVD21_HUMAN;A0A0A0MT36	Other Human Protein	1	1	1	1	1	1	1	1	1	1	1	1	1	1	1	1	1	1	1	1	1	1	1	1	0	0	0	0	0	0	0	5177600
sp|A0A0B4J1U7|HV601_HUMAN;A0A0B4J1U7	Other Human Protein	1	1	1	1	1	1	1	1	1	1	1	1	1	1	1	1	1	1	1	1	1	1	1	1	0	0	0	0	0	0	0	16962000
MH0026_GL0030158;MH0250_GL0100301;MH0399_GL0044029;MH0250_GL0011723;MH0416_GL0040939;MH0458_GL0015793	Glucosidase	1	22	0	22	0	22	1	20	1	22	0	22	0	1	22	20	0	0	0	0	0	0	0	0	0	12167000000	0	788420000	0	6607500000	0	800410000		Type 2
sp|A0A0B4J1X5|HV374_HUMAN;A0A0B4J1X5;sp|P01767|HV353_HUMAN;sp|A0A0C4DH42|HV366_HUMAN;A0A0C4DH42;sp|P01772|HV333_HUMAN;P01767;P01772	Other Human Protein	1	2	3	3	2	2	2	1	1	1	2	2	1	1	1	1	0	0	1	1	0	0	0	0	0	0	324120000	355160000	0	0	0	0
sp|A0A0B4J1X8|HV343_HUMAN;A0A0B4J1X8	Other Human Protein	1	1	1	2	1	1	1	1	0	0	0	1	0	0	0	0	0	0	0	1	0	0	0	0	0	0	0	11741000	0	0	0	0
sp|A0A0B4J2D9|KVD13_HUMAN;A0A0B4J2D9	Other Human Protein	0	0	1	1	1	1	0	0	0	0	1	1	1	0	1	0	0	0	1	1	1	1	0	0	0	0	0	0	0	22945000	0	0
sp|A0A0C4DH29|HV103_HUMAN;A0A0C4DH29	Other Human Protein	0	1	0	1	0	0	0	0	0	1	0	1	0	0	0	0	0	1	0	1	0	0	0	0	0	0	0	10419000	0	0	0	0
MH0010_GL0040006;DOM005_GL0031894;O2.UC29-1_GL0098247;O2.UC36-0_GL0091795;MH0362_GL0051007;MH0200_GL0192794;O2.UC24-2_GL0010716;667015.Bacsa_2094;MH0402_GL0188239;N087A_GL0101662;MH0181_GL0121435;MH0355_GL0035967;O2.UC1-1_GL0127988;NLM004_GL0065760	Glucosidase	0	29	1	18	0	24	0	22	0	29	1	18	0	0	24	22	0	4	0	0	0	4	0	0	0	9089600000	0	489550000	0	1568700000	0	9856700000		Type 2
sp|P04264|K2C1_HUMAN;P04264;CON__P04264	Contaminant - Keratin	27	28	27	32	27	22	30	30	27	28	27	32	27	30	22	30	16	16	15	20	15	10	18	17	5162600000	6875300000	3725300000	5795000000	4503100000	2202800000	7365200000	5623100000
MH0062_GL0039711	Glucosidase	0	24	1	30	0	10	0	3	0	24	1	30	0	0	10	3	0	20	1	26	0	8	0	3	0	6247200000	0	2826800000	0	27557000	0	12358000		Type 1
sp|P01624|KV315_HUMAN;sp|A0A0C4DH55|KVD07_HUMAN;A0A0C4DH55;P01624	Other Human Protein	1	1	1	1	1	1	1	1	1	1	1	1	1	1	1	1	1	1	1	1	1	1	1	1	0	0	0	0	0	0	0	83248000
sp|A0A0C4DH67|KV108_HUMAN;A0A0C4DH67;sp|A0A0C4DH69|KV109_HUMAN;sp|A0A075B6S5|KV127_HUMAN;A0A0C4DH69;A0A075B6S5	Other Human Protein	1	0	0	1	1	1	0	0	1	0	0	1	1	0	1	0	1	0	0	1	1	1	0	0	0	0	0	3355200	0	0	0	0
sp|A0A0C4DH68|KV224_HUMAN;A0A0C4DH68	Other Human Protein	1	1	1	1	1	1	1	1	1	1	1	1	1	1	1	1	1	1	1	1	1	1	1	1	0	0	0	0	0	0	0	64012000
sp|P04432|KVD39_HUMAN;sp|P01611|KVD12_HUMAN;sp|P01597|KV139_HUMAN;sp|A0A0C4DH73|KV112_HUMAN;sp|A0A0C4DH72|KV106_HUMAN;A0A0C4DH73;A0A0C4DH72;P04432;P01611;P01597	Other Human Protein	1	1	1	1	1	1	1	1	1	1	1	1	1	1	1	1	1	1	1	1	1	1	1	1	0	0	0	0	0	0	0	2570600
sp|A6NC57|ANR62_HUMAN;A6NC57	Other Human Protein	0	0	0	0	0	0	0	1	0	0	0	0	0	0	0	1	0	0	0	0	0	0	0	1	0	0	0	0	0	0	0	10230000
sp|A6NEC2|PSAL_HUMAN;sp|P55786|PSA_HUMAN;A6NEC2;P55786	Other Human Protein	0	0	0	0	1	1	0	1	0	0	0	0	1	0	1	1	0	0	0	0	1	1	0	1	0	0	0	0	0	0	0	19951000
sp|P07355|ANXA2_HUMAN;sp|A6NMY6|AXA2L_HUMAN;P07355;A6NMY6	Other Human Protein	0	1	0	1	0	0	0	0	0	1	0	1	0	0	0	0	0	1	0	1	0	0	0	0	0	0	0	1636900	0	0	0	0
sp|P13645|K1C10_HUMAN;CON__P13645;P13645;sp|Q7Z3Y7|K1C28_HUMAN;CON__Q7Z3Y7;Q7Z3Y7;CON__P05784;sp|Q7Z3Z0|K1C25_HUMAN;CON__Q7Z3Z0;sp|Q7Z3Y8|K1C27_HUMAN;CON__Q7Z3Y8;CON__Q148H6;sp|Q2M2I5|K1C24_HUMAN;CON__Q2M2I5;Q7Z3Z0;Q7Z3Y8;Q2M2I5	Contaminant - Keratin	26	24	25	29	25	18	29	24	26	24	25	29	25	29	18	24	16	13	16	18	16	10	18	13	4323000000	5962100000	1881300000	2807300000	1966800000	800640000	6120100000	2248400000
MH0062_GL0017613	Glucosidase	5	31	0	30	0	14	0	13	5	31	0	30	0	0	14	13	4	22	0	21	0	9	0	8	10175000	5477500000	0	2629000000	0	166800000	0	87760000		Type 1
sp|P35908|K22E_HUMAN;CON__P35908;P35908;sp|Q01546|K22O_HUMAN;Q01546;CON__Q01546;CON__Q6NXH9	Contaminant - Keratin	27	30	22	28	24	22	29	26	25	28	20	26	22	27	20	24	14	17	12	15	12	13	16	15	1268600000	4471700000	789240000	1527300000	1045200000	388800000	3846500000	1148800000
MH0067_GL0015673	Glucosidase	1	11	2	19	1	2	1	8	1	8	2	15	1	1	1	4	0	0	0	3	0	0	0	0	0	3461600000	0	3348800000	0	0	0	2063200000		Type 2
BGI-06A_GL0009635;NLM007_GL0033246	Glucosidase	1	13	0	13	0	14	0	14	0	1	0	0	0	0	0	1	0	0	0	0	0	0	0	0	0	0	0	0	0	0	0	34109000		Type 1
BGI-28A_GL0010356;MH0308_GL0183256;O2.CD3-0-PT_GL0064770;V1.UC50-1_GL0117748;MH0373_GL0157751	Bacterial Non-GH Protein	3	2	2	3	2	3	3	3	1	1	0	1	1	1	1	1	0	0	0	0	0	0	0	0	0	0	0	0	0	0	0	2716500
sp|P07478|TRY2_HUMAN;P07478	Other Human Protein	6	6	6	6	6	6	6	6	6	6	6	6	6	6	6	6	3	3	3	3	3	3	3	3	3822100000	3148900000	1544700000	2302200000	7835500000	5270400000	7822300000	6359800000
MH0384_GL0068300;BGI-33A_GL0034010;T2D-135A_GL0108624;MH0309_GL0012223	Bacterial Non-GH Protein	1	1	0	1	0	0	1	0	1	1	0	1	0	1	0	0	1	1	0	1	0	0	1	0	0	0	0	0	0	0	2918600	0
MH0430_GL0201667;O2.UC46-2_GL0153724;MH0386_GL0159060;T2D-133A_GL0055444;MH0204_GL0154099;NOF010_GL0038372;MH0224_GL0108991;V1.CD14-0_GL0037032;T2D-22A_GL0083065;MH0101_GL0002372;MH0097_GL0091213;MH0069_GL0021480;MH0036_GL0050234;V1.FI17_GL0018086;O2.UC27-0_GL0038181;MH0173_GL0071441;V1.UC57-0_GL0108235;V1.UC41-0_GL0043839;T2D-73A_GL0040942;T2D-118A_GL0017792;T2D-110A_GL0036833;T2D-109A_GL0073634…	Bacterial Non-GH Protein	0	1	1	0	1	1	1	0	0	1	1	0	1	1	1	0	0	1	1	0	1	1	1	0	0	0	0	0	0	87451000	0	0
CON__ENSEMBL:ENSBTAP00000038253	Contaminant - Other	8	8	7	9	9	6	8	8	0	0	0	1	1	0	0	0	0	0	0	0	0	0	0	0	0	0	0	0	2099800	0	0	0
CON__ENSEMBL:ENSBTAP00000038329;CON__REFSEQ:XP_001252647	Contaminant - Other	0	1	0	0	0	0	1	0	0	1	0	0	0	1	0	0	0	1	0	0	0	0	1	0	0	0	0	0	0	0	288150000	0
MH0239_GL0092243;O2.UC15-0_GL0071259;V1.FI18_GL0061234;MH0150_GL0163670;O2.CD3-0-PT_GL0017207;V1.UC50-1_GL0188466;O2.UC7-1_GL0142943	Glucuronidase	1	22	0	9	0	18	0	11	1	22	0	9	0	0	18	11	1	4	0	1	0	3	0	1	0	3120500000	0	102830000	0	4768300000	0	338440000	No loop
MH0309_GL0100522	Other Bacterial GH Protein	0	14	0	15	1	11	0	7	0	14	0	15	1	0	11	7	0	14	0	15	1	11	0	7	0	2715700000	0	503910000	0	205370000	0	128020000
sp|P15144|AMPN_HUMAN;P15144	Other Human Protein	32	28	20	27	29	33	2	3	32	28	20	27	29	2	33	3	32	28	20	27	29	33	2	3	1527400000	2560400000	186420000	663600000	1061600000	3432900000	2577000	2850600
CON__P02535-1	Contaminant - Other	9	9	8	9	8	7	8	8	1	1	1	1	1	0	1	0	0	0	0	0	0	0	0	0	0	0	0	0	0	10378000	0	0
MH0200_GL0193636	Glucuronidase	1	16	1	2	0	1	1	3	1	16	1	2	0	1	1	3	1	16	1	2	0	1	1	3	0	2350600000	0	1643900	0	0	0	2492900	No loop
sp|P04746|AMYP_HUMAN;P04746	Other Human Protein	16	14	11	14	15	16	17	16	16	14	11	14	15	17	16	16	3	3	0	3	3	2	4	3	3799700000	2064700000	294910000	365060000	1287100000	1131200000	1095000000	1198300000
CON__P02663	Contaminant - Other	0	1	0	0	0	0	1	1	0	1	0	0	0	1	0	1	0	1	0	0	0	0	1	1	0	0	0	0	0	0	0	5715700
CON__P02676	Contaminant - Other	1	1	0	1	1	1	0	1	1	1	0	1	1	0	1	1	1	1	0	1	1	1	0	1	0	0	0	0	0	0	0	13877000
CON__P02754	Contaminant - Other	1	2	1	1	1	1	1	1	1	2	1	1	1	1	1	1	1	2	1	1	1	1	1	1	0	0	0	0	0	0	0	3264500
sp|P01834|IGKC_HUMAN;P01834	Other Human Protein	5	5	5	5	5	5	5	5	5	5	5	5	5	5	5	5	5	5	5	5	5	5	5	5	1597900000	2064400000	7532800000	6196000000	3918300000	3173500000	1954600000	1557900000
O2.UC18-1_GL0184033;T2D-143A_GL0019724;MH0375_GL0054064	Glucosidase	1	20	0	22	0	26	0	20	1	18	0	20	0	0	24	19	1	6	0	8	0	9	0	8	0	1960800000	0	417210000	0	5378800000	0	1075700000		Type 1
sp|Q9NSI6|BRWD1_HUMAN;Q9NSI6	Other Human Protein	1	2	1	1	1	1	1	1	1	2	1	1	1	1	1	1	1	2	1	1	1	1	1	1	0	1760800000	0	0	0	0	0	0
MH0014_GL0101217	Glucuronidase	1	18	1	9	0	5	1	15	1	11	1	6	0	1	1	11	0	1	0	0	0	0	1	1	0	1627100000	0	30453000	0	0	0	717770000	No loop
sp|P35527|K1C9_HUMAN;P35527;CON__P35527	Contaminant - Keratin	19	19	20	22	21	19	22	20	18	18	19	21	20	21	19	19	18	18	19	21	20	19	21	19	852510000	1554400000	1523500000	1855400000	1927400000	904380000	1383400000	2153800000
sp|P01009|A1AT_HUMAN;P01009	Other Human Protein	19	18	18	18	19	19	18	17	19	18	18	18	19	18	19	17	19	18	18	18	19	19	18	17	2934700000	1550400000	1562300000	1462300000	1931700000	1729600000	860120000	1204000000
MH0003_GL0006277;MH0316_GL0147219;NOM023_GL0021699	Glucuronidase	1	13	1	20	0	11	0	16	1	13	1	20	0	0	11	16	0	1	1	5	0	1	0	3	163170000	1547300000	0	2166600000	0	250950000	0	1284800000	Mini-Loop 1
sp|P01876|IGHA1_HUMAN;P01876	Other Human Protein	10	8	12	14	11	10	7	6	10	8	12	14	11	7	10	6	4	3	5	7	4	4	2	2	1627400000	1370600000	6407000000	8252000000	2390400000	3034100000	392210000	670660000
NLM002_GL0025056;T2D-8A_GL0107268;ED13A_GL0026995;MH0238_GL0196685;NLM010_GL0037047;MH0298_GL0001563;MH0131_GL0171674;411467.BACCAP_02828;MH0435_GL0148694;MH0192_GL0011067;MH0118_GL0113609;V1.FI36_GL0106686;MH0262_GL0066992;MH0433_GL0063179;MH0433_GL0111678	Bacterial Non-GH Protein	13	14	14	16	9	11	14	13	13	14	14	16	9	14	11	13	0	0	0	0	0	0	0	0	1586300000	1339400000	863040000	1294200000	308780000	371550000	1204700000	1403300000
MH0309_GL0069954	Glucuronidase	0	18	0	18	1	15	1	12	0	18	0	18	1	1	15	12	0	17	0	17	1	14	1	11	0	1310400000	0	977070000	0	354870000	0	260700000	No loop
sp|Q7RTS7|K2C74_HUMAN;CON__Q7RTS7;sp|Q86Y46|K2C73_HUMAN;CON__Q32MB2;Q7RTS7;Q86Y46;sp|Q3SY84|K2C71_HUMAN;CON__Q3SY84;Q3SY84	Contaminant - Keratin	5	5	3	6	5	3	5	4	1	1	1	1	1	1	1	1	0	0	0	0	0	0	0	0	0	0	0	0	0	0	0	32322000
MH0227_GL0111292	Glucosidase	2	20	0	15	1	18	0	19	2	20	0	15	1	0	18	19	0	0	0	0	0	0	0	0	273890000	1267900000	0	456550000	0	255280000	0	2561300000		Type 2
CON__Q6IFX2	Contaminant - Other	5	5	7	4	4	5	5	5	0	0	1	0	0	0	0	0	0	0	1	0	0	0	0	0	0	0	2280700	0	0	0	0	0
CON__Q6IFZ6	Contaminant - Other	6	6	4	5	4	4	7	5	1	1	0	0	0	2	0	0	0	0	0	0	0	0	1	0	0	0	0	0	0	0	3847500	0
DOF008_GL0048356;MH0006_GL0020930;O2.UC23-2_GL0137515;MH0165_GL0013272;V1.CD21-0_GL0018913;MH0287_GL0057305;DOF008_GL0070077;MH0360_GL0067930;MH0236_GL0022336;V1.CD8-0-PN_GL0150206;O2.UC46-0_GL0054003;MH0196_GL0046328;V1.UC56-0_GL0055993;O2.UC20-1_GL0103221	Other Bacterial GH Protein	4	16	1	14	0	3	0	1	4	16	1	14	0	0	3	1	3	14	0	11	0	1	0	1	6502700	1214400000	0	76875000	0	6811200	0	0
MH0127_GL0067595;NLM031_GL0060927;T2D-105A_GL0132471;V1.CD28-0_GL0065494;DLM010_GL0003499;DLM010_GL0033311;NLM028_GL0060415;MH0292_GL0085384;NLM031_GL0089914;V1.UC39-4_GL0069292;O2.UC21-1_GL0001128;O2.UC31-1_GL0170510;V1.FI35_GL0123125;MH0432_GL0112221;O2.UC26-0_GL0069910;BGI-06A_GL0041761;V1.CD17-4_GL0091217	Bacterial Non-GH Protein	22	19	14	16	12	13	14	17	21	18	13	15	11	13	12	16	7	6	4	4	2	4	2	4	1479900000	1141800000	135760000	92569000	114480000	100230000	139150000	174890000
sp|Q86YZ3|HORN_HUMAN;CON__Q86YZ3;Q86YZ3	Contaminant - Other	2	1	2	2	2	1	2	2	2	1	2	2	2	2	1	2	2	1	2	2	2	1	2	2	5873000	0	9979700	21110000	10971000	6042600	10483000	11657000
MH0275_GL0147462	Glucosidase	2	25	0	29	0	28	1	4	2	25	0	29	0	1	28	4	0	12	0	15	0	14	0	0	5290800	833130000	0	2697700000	0	2208500000	0	36433000		Type 1
sp|P07477|TRY1_HUMAN;CON__P07477;P07477	Contaminant - Other	4	4	4	3	5	4	2	3	3	3	3	2	4	1	3	2	3	3	2	2	3	3	1	2	656380000	828950000	19063000	18360000	315050000	363850000	0	12114000
DLF006_GL0037841	Bacterial Non-GH Protein	2	6	5	9	5	5	0	2	0	1	0	1	1	0	1	0	0	0	0	0	0	0	0	0	0	0	0	0	0	26813000	0	0
V1.UC55-4_GL0180886;MH0220_GL0081288;MH0371_GL0073066;V1.FI17_GL0027318;V1.UC16-0_GL0090081;V1.CD54-0_GL0026955;O2.UC22-2_GL0074168;MH0088_GL0087645;MH0012_GL0099379;V1.FI17_GL0061213;T2D-68A_GL0081948;O2.UC28-1_GL0156012;DLF014_GL0015522;T2D-73A_GL0012150;MH0088_GL0108545	Bacterial Non-GH Protein	0	0	0	1	1	1	1	1	0	0	0	1	1	1	1	1	0	0	0	1	1	1	1	1	0	0	0	0	0	0	0	7376300
MH0053_GL0026013;MH0200_GL0067716;MH0057_GL0038936;MH0014_GL0000672;O2.UC43-0_GL0008568;O2.CD2-0_GL0004939;NLF006_GL0002229;MH0357_GL0019105;MH0323_GL0144804;MH0281_GL0071487;MH0274_GL0124381;MH0243_GL0079002;MH0192_GL0072432;MH0181_GL0035322;MH0132_GL0000009;MH0107_GL0090846;MH0055_GL0011199;MH0055_GL0011155;MH0047_GL0018121;MH0047_GL0007983;MH0031_GL0004124;MH0011_GL0068383;MH0011_GL0034140;MH0…	Bacterial Non-GH Protein	2	2	1	1	0	1	2	2	2	2	1	1	0	2	1	2	1	1	1	0	0	1	1	1	0	0	0	0	0	0	0	4955100
DLM007_GL0060510	Glucosidase	0	2	0	3	0	1	0	0	0	0	0	1	0	0	0	0	0	0	0	1	0	0	0	0	0	0	0	10798000	0	0	0	0		Type 2
sp|Q9BYE9|CDHR2_HUMAN;Q9BYE9	Other Human Protein	15	15	12	14	13	14	10	11	15	15	12	14	13	10	14	11	15	15	12	14	13	14	10	11	939560000	801170000	382670000	301730000	636830000	787640000	185110000	203060000
sp|Q9Y6R7|FCGBP_HUMAN;Q9Y6R7	Other Human Protein	25	29	32	44	34	33	20	18	25	29	32	44	34	20	33	18	25	29	32	44	34	33	20	18	882020000	774890000	898560000	1816800000	1083600000	1704100000	360910000	561380000
MH0309_GL0050276	Other Bacterial GH Protein	0	15	0	11	0	3	0	5	0	15	0	11	0	0	3	5	0	12	0	10	0	1	0	4	0	637480000	0	70403000	0	9248000	0	18001000
sp|O43451|MGA_HUMAN;O43451;sp|Q2M2H8|MGAL_HUMAN;Q2M2H8	Other Human Protein	23	24	24	28	23	26	12	17	23	24	24	28	23	12	26	17	23	23	23	27	22	25	12	16	527690000	601250000	289250000	638020000	354850000	703750000	86844000	171190000
MH0100_GL0045565	Bacterial Non-GH Protein	6	7	7	6	7	7	6	6	4	5	5	4	5	4	5	4	0	0	0	0	0	0	0	0	689800000	572970000	364430000	326880000	675970000	458380000	513940000	573830000
MH0217_GL0051789	Other Bacterial GH Protein	0	6	0	12	0	0	1	0	0	6	0	12	0	1	0	0	0	6	0	12	0	0	1	0	0	548040000	0	264820000	0	0	0	0
MH0402_GL0154567;MH0126_GL0121965;DOF009_GL0005293;MH0338_GL0072213;MH0037_GL0018090;MH0415_GL0020959;V1.UC26-0_GL0073140;N085A_GL0044702;MH0407_GL0200426;MH0281_GL0129818;MH0265_GL0088893;MH0243_GL0051268;MH0198_GL0127580;MH0047_GL0020628;MH0011_GL0096117;MH0004_GL0032072;MH0004_GL0029768;MH0113_GL0001575;MH0010_GL0014068;MH0152_GL0056788;O2.UC58-2_GL0059191;MH0009_GL0016514;O2.UC1-1_GL0110268;M…	Bacterial Non-GH Protein	3	3	2	4	0	0	3	4	0	0	0	1	0	0	0	1	0	0	0	0	0	0	0	0	0	0	0	0	0	0	0	6686200
T2D-9A_GL0069340	Glucuronidase	0	9	0	7	0	6	0	9	0	0	0	0	0	0	1	0	0	0	0	0	0	1	0	0	0	0	0	0	0	6694100	0	0	No loop
DOF010_GL0042684;MH0389_GL0054465;MH0032_GL0026810;V1.UC62-0_GL0172498;MH0189_GL0105207;MH0005_GL0007502	Bacterial Non-GH Protein	5	3	5	5	3	5	1	2	1	0	0	0	0	0	0	0	1	0	0	0	0	0	0	0	7108000	0	0	0	0	0	0	0
DOF012_GL0039065;MH0161_GL0105555;V1.UC58-0_GL0134688;V1.UC53-0_GL0000443;V1.CD32-0_GL0057716;O2.UC31-1_GL0041846;MH0420_GL0102206;MH0101_GL0011208;MH0446_GL0233682;V1.UC28-0_GL0095049;HT14A_GL0024710;MH0322_GL0059450;MH0188_GL0096572;V1.UC11-5_GL0023416;O2.CD1-0-PT_GL0131611;MH0198_GL0105579;MH0185_GL0110505;MH0433_GL0243707;MH0035_GL0021718;MH0016_GL0006564	Bacterial Non-GH Protein	1	0	5	3	6	6	6	6	0	0	4	2	5	5	5	5	0	0	1	0	1	1	1	1	0	0	14115000	12360000	73378000	86822000	103570000	81295000
DOM001_GL0092992	Other Bacterial GH Protein	0	1	0	2	0	0	0	1	0	0	0	1	0	0	0	0	0	0	0	1	0	0	0	0	0	0	0	3434300	0	0	0	0
MH0402_GL0138617;DOM005_GL0007998;MH0239_GL0005733;V1.CD6-4_GL0119261;T2D-48A_GL0013060;T2D-113A_GL0127286;MH0381_GL0090870;MH0061_GL0019909;MH0002_GL0050793;T2D-110A_GL0048381;MH0058_GL0065004;MH0011_GL0047920;V1.UC41-0_GL0102866;O2.UC41-2_GL0048840;T2D-123A_GL0007860;T2D-134A_GL0049392;MH0330_GL0073747	Bacterial Non-GH Protein	3	2	5	5	3	3	5	6	0	0	1	1	0	0	0	1	0	0	0	0	0	0	0	0	0	0	0	0	0	0	0	2227500
N087A_GL0070177;MH0381_GL0099569;MH0333_GL0051763;MH0203_GL0225657;MH0011_GL0039183;T2D-97A_GL0035075;DOM005_GL0011500;O2.UC28-0_GL0177312;MH0101_GL0104595;O2.UC8-0_GL0107804;MH0038_GL0028717;763034.HMPREF9446_00972;MH0004_GL0019783	Bacterial Non-GH Protein	2	2	2	4	0	0	2	4	0	0	0	1	0	0	0	1	0	0	0	1	0	0	0	1	0	0	0	0	0	0	0	5271800
DOM005_GL0013586;T2D-105A_GL0051420;MH0187_GL0017308	Glucosidase	2	16	0	13	1	14	0	15	0	1	0	1	0	0	0	1	0	0	0	0	0	0	0	0	0	0	0	0	0	0	0	55490000		Type 2
O2.UC24-2_GL0074851;V1.UC26-4_GL0008047;T2D-73A_GL0040598;T2D-48A_GL0119470;T2D-113A_GL0024389;N085A_GL0076746;MH0198_GL0082797;MH0143_GL0078046;MH0016_GL0072221;MH0011_GL0058013;MH0004_GL0020784;MH0003_GL0066617;DOM005_GL0025428;T2D-198A_GL0058126;N087A_GL0112125;MH0272_GL0087000;MH0187_GL0102444;MH0152_GL0028949;MH0381_GL0168176;MH0402_GL0062433;MH0333_GL0114802;MH0267_GL0031281;MH0447_GL023332…	Bacterial Non-GH Protein	0	1	1	3	0	0	1	2	0	1	1	3	0	1	0	2	0	0	0	1	0	0	1	1	0	0	0	11756000	0	0	0	17090000
DOM005_GL0044084	Bacterial Non-GH Protein	5	5	3	5	4	3	5	5	1	1	0	1	1	1	1	1	0	0	0	0	0	0	0	0	0	0	0	0	0	0	0	10111000
DOM005_GL0045688	Bacterial Non-GH Protein	1	1	1	2	0	0	1	1	0	0	0	1	0	0	0	0	0	0	0	1	0	0	0	0	0	0	0	953750	0	0	0	0
V1.CD42-0_GL0051452;DOM005_GL0047239	Bacterial Non-GH Protein	0	0	1	1	0	1	0	0	0	0	1	1	0	0	1	0	0	0	1	1	0	1	0	0	0	0	0	0	0	3326200	0	0
DOM016_GL0067168	Bacterial Non-GH Protein	0	0	4	5	0	1	0	0	0	0	4	5	0	0	1	0	0	0	1	1	0	0	0	0	0	0	246830000	164480000	0	0	0	0
DOM019_GL0027166;O2.UC8-1_GL0125178;SZEY-29A_GL0039497	Bacterial Non-GH Protein	4	3	5	6	5	5	9	8	0	0	0	0	0	1	0	0	0	0	0	0	0	0	1	0	0	0	0	0	0	0	21555000	0
DOM022_GL0028751;V1.FI15_GL0004731	Bacterial Non-GH Protein	6	8	13	13	9	9	12	12	0	1	1	1	0	0	0	1	0	1	1	1	0	0	0	1	0	0	0	0	0	0	0	2263900
DOM022_GL0072436;V1.UC8-0_GL0013469;V1.CD52-0_GL0017570;O2.UC36-0_GL0057899;V1.CD3-0-PN_GL0067967;T2D-47A_GL0107553;MH0441_GL0003700;MH0390_GL0182054;MH0211_GL0166126;MH0230_GL0088137	Bacterial Non-GH Protein	5	6	6	6	1	3	2	2	0	1	1	1	0	0	0	0	0	0	0	0	0	0	0	0	0	0	0	33747000	0	0	0	0
DOM023_GL0034788;O2.UC46-0_GL0036306;N079A_GL0030240;MH0343_GL0183526;MH0395_GL0046850;NLM005_GL0007555	Bacterial Non-GH Protein	7	7	14	15	9	10	12	11	1	1	1	1	0	1	0	1	0	0	0	0	0	0	0	0	1323400	0	7619900	4648800	0	0	13438000	4865300
ED10A_GL0111621;O2.CD3-0-PT_GL0034774	Bacterial Non-GH Protein	1	2	1	2	2	2	1	1	1	1	1	1	1	1	1	1	1	1	1	1	1	1	1	1	0	0	0	0	0	0	0	3797500
ED14A_GL0028024	Bacterial Non-GH Protein	2	2	2	2	0	0	2	2	1	1	1	1	0	1	0	1	0	0	0	0	0	0	0	0	0	0	0	0	0	0	0	41321000
MH0318_GL0120522;MH0252_GL0159941;ED15A_GL0089816;DLF013_GL0012895	Bacterial Non-GH Protein	2	4	0	0	0	0	0	0	2	2	0	0	0	0	0	0	2	2	0	0	0	0	0	0	19310000	0	0	0	0	0	0	0
V1.FI30_GL0074280	Unknown	1	1	1	1	1	1	1	1	1	1	1	1	1	1	1	1	1	1	1	1	1	1	1	1	790450000	526230000	0	492720000	0	771770000	1092200000	589590000
sp|P01833|PIGR_HUMAN;P01833	Other Human Protein	12	13	17	21	16	15	9	7	12	13	17	21	16	9	15	7	12	13	17	21	16	15	9	7	592610000	523290000	1775300000	2560800000	807060000	722180000	124910000	63138000
HT25A_GL0106997;MH0367_GL0050319;MH0419_GL0024064;V1.UC13-3_GL0065078;O2.UC5-2_GL0077228;MH0373_GL0152025;MH0149_GL0058324;MH0206_GL0033221;V1.CD7-4_GL0046637;V1.CD21-0_GL0001407;V1.CD2-0-PT_GL0000326;V1.CD20-4_GL0155205;V1.CD17-4_GL0037596;V1.CD1-0-PN_GL0004692;O2.UC17-2_GL0083573;MH0418_GL0199604;MH0335_GL0022252;MH0333_GL0077100;MH0316_GL0214755;MH0274_GL0027770;MH0251_GL0071179;MH0211_GL01179…	Bacterial Non-GH Protein	7	7	7	6	7	7	7	7	1	1	1	1	1	1	1	1	0	0	0	0	0	0	0	0	0	0	0	0	0	0	0	43464000
MH0390_GL0000436;sp|Q6UWM7|LCTL_HUMAN;Q6UWM7	Unknown	0	8	0	1	0	0	0	6	0	8	0	1	0	0	0	6	0	8	0	1	0	0	0	6	0	486270000	0	0	0	0	0	28077000
MH0147_GL0013783	Glucosidase	0	20	0	23	0	2	0	4	0	18	0	21	0	0	0	2	0	16	0	19	0	0	0	1	0	482810000	0	958690000	0	0	0	17815000		Type 1
MH0002_GL0003630	Glucosidase	1	4	0	3	0	3	0	11	0	0	0	0	0	0	0	7	0	0	0	0	0	0	0	2	0	0	0	0	0	0	0	219900000		Type 2
MH0002_GL0007247	Bacterial Non-GH Protein	3	3	5	6	3	4	2	4	0	0	0	0	0	1	0	0	0	0	0	0	0	0	0	0	0	0	0	0	0	0	0	0
sp|P08236|BGLR_HUMAN;P08236	Glucuronidase	0	8	0	8	0	10	0	9	0	8	0	8	0	0	10	9	0	8	0	8	0	10	0	9	0	465370000	0	170220000	0	620980000	0	316150000	No loop
sp|P09093|CEL3A_HUMAN;P09093	Other Human Protein	12	7	9	12	9	7	11	11	12	7	9	12	9	11	7	11	10	5	7	10	7	5	9	8	478040000	456810000	519760000	629260000	620710000	442730000	2890000000	1899600000
MH0002_GL0031598;T2D-113A_GL0141620	Bacterial Non-GH Protein	6	6	4	6	1	0	4	5	0	1	0	1	0	0	0	0	0	0	0	0	0	0	0	0	0	0	0	176520	0	0	0	0
MH0109_GL0082889;T2D-48A_GL0124116;N085A_GL0024920;667015.Bacsa_2095	Glucosidase	0	15	0	13	1	9	0	18	0	15	0	13	1	0	9	18	0	5	0	3	0	1	0	5	0	431510000	0	232620000	0	72590000	0	3075100000		Type 2
T2D-135A_GL0088692;MH0002_GL0033664;DOM017_GL0037388	Bacterial Non-GH Protein	0	0	0	2	0	0	1	2	0	0	0	2	0	1	0	2	0	0	0	2	0	0	1	2	0	0	0	0	0	0	0	21589000
sp|P06731|CEAM5_HUMAN;P06731	Other Human Protein	5	5	6	8	6	5	5	5	5	5	6	8	6	5	5	5	3	3	4	6	4	4	3	3	455010000	428020000	549810000	538830000	275490000	340690000	312160000	363920000
T2D-135A_GL0018866;MH0003_GL0013354;MH0039_GL0013251;NOF013_GL0021011;MH0128_GL0041497;MH0428_GL0007442;MH0321_GL0041513;MH0006_GL0175421;V1.UC41-0_GL0023383;T2D-110A_GL0083909;MH0181_GL0000403;MH0267_GL0018679;MH0037_GL0001441;MH0003_GL0076047;MH0415_GL0025303;NOF010_GL0092143;N089A_GL0120757;MH0097_GL0053492;MH0038_GL0053742	Bacterial Non-GH Protein	12	13	11	12	3	7	13	13	12	13	11	12	3	13	7	13	1	1	0	1	0	0	1	1	394960000	424750000	193540000	327110000	59668000	74740000	392790000	683480000
NOF010_GL0005658;T2D-48A_GL0022398;T2D-113A_GL0127318;O2.UC54-0_GL0028205;N085A_GL0088042;N087A_GL0008865;MH0198_GL0112510;MH0016_GL0023455;MH0381_GL0145748;MH0176_GL0001013;V1.FI32_GL0013531;V1.FI01_GL0111336;MH0257_GL0127583;MH0002_GL0057859;O2.UC24-2_GL0053566;V1.UC50-1_GL0001164;MH0438_GL0029998;MH0222_GL0063300;MH0267_GL0114006;MH0239_GL0057243;MH0014_GL0091117;MH0004_GL0022351;MH0003_GL0047…	Bacterial Non-GH Protein	2	2	3	4	2	3	4	3	0	0	1	1	0	1	1	1	0	0	1	1	0	1	1	1	0	0	0	0	0	0	0	10778000
MH0002_GL0064917;MH0445_GL0169899;MH0222_GL0091709;MH0187_GL0143873;MH0143_GL0009187;MH0057_GL0021120;MH0046_GL0036051;MH0402_GL0011634;MH0314_GL0102416;MH0038_GL0014610;MH0025_GL0021003;MH0188_GL0097972;MH0253_GL0134623;O2.UC24-1_GL0112883;MH0435_GL0051801;MH0381_GL0092043;O2.UC17-1_GL0018187;O2.UC54-0_GL0035708;NLF001_GL0024079;MH0101_GL0104228;MH0016_GL0044420;MH0006_GL0021178;NOF012_GL0032148…	Bacterial Non-GH Protein	4	5	6	6	3	2	6	5	0	1	1	1	0	1	0	1	0	0	0	0	0	0	0	0	0	0	0	0	0	0	0	125950000
MH0251_GL0079003;T2D-114A_GL0021064	Bacterial Non-GH Protein	9	10	9	9	9	9	6	8	9	10	9	9	9	6	9	8	0	0	0	0	1	0	0	0	377130000	410040000	264240000	338870000	263520000	332800000	275200000	457670000
MH0388_GL0099603	Other Bacterial GH Protein	0	4	0	4	0	3	0	0	0	1	0	1	0	0	1	0	0	1	0	1	0	1	0	0	0	400330000	0	82185000	0	0	0	0
MH0087_GL0010278	Glucuronidase	0	1	0	4	0	0	0	6	0	1	0	3	0	0	0	6	0	0	0	2	0	0	0	5	0	0	0	14144000	0	0	0	105240000	Mini-Loop 1
MH0193_GL0031176;O2.UC19-2_GL0044418;MH0373_GL0191825	Glucosidase	0	13	0	1	0	0	0	0	0	13	0	1	0	0	0	0	0	13	0	1	0	0	0	0	0	371590000	0	0	0	0	0	0		Type 2
sp|P01591|IGJ_HUMAN;P01591	Other Human Protein	5	5	5	5	5	5	4	3	5	5	5	5	5	4	5	3	5	5	5	5	5	5	4	3	312820000	370890000	1012200000	2183300000	368740000	365380000	48826000	54280000
MH0003_GL0049841	Bacterial Non-GH Protein	3	2	5	4	3	4	2	3	0	0	1	0	1	1	1	1	0	0	1	0	1	1	1	1	0	0	0	0	0	0	0	1851200
MH0003_GL0042541	Bacterial Non-GH Protein	8	8	6	8	4	4	11	11	8	8	6	8	4	11	4	11	4	4	2	2	2	2	4	4	336140000	366060000	105500000	52182000	23849000	16228000	373050000	343440000
MH0281_GL0029210;NOF001_GL0022671	Bacterial Non-GH Protein	17	14	17	20	13	12	18	18	17	14	17	20	13	18	12	18	0	0	0	0	0	0	0	0	477880000	358150000	715760000	703320000	399320000	517050000	1214000000	1311900000
MH0003_GL0067184;T2D-135A_GL0049988;MH0435_GL0070804;O2.UC8-0_GL0059216;MH0198_GL0177914;NOF010_GL0067500;MH0113_GL0048832;MH0039_GL0019368;O2.UC13-0_GL0042132;MH0298_GL0072656;V1.UC26-4_GL0122563;MH0243_GL0085822;MH0264_GL0027720;MH0057_GL0010239;MH0260_GL0005199;DOM022_GL0078991	Bacterial Non-GH Protein	2	2	4	4	1	2	6	6	1	1	2	2	0	4	1	4	0	0	1	2	0	0	2	2	0	0	7260200	13582000	0	0	28406000	35970000
V1.CD4-0-PT_GL0015627;T2D-68A_GL0088976	Bacterial Non-GH Protein	18	17	0	2	0	0	8	7	18	17	0	2	0	8	0	7	6	6	0	2	0	0	4	4	479790000	358060000	0	3108700	0	0	20390000	18450000
MH0267_GL0210246;MH0128_GL0004943;MH0110_GL0083040;MH0037_GL0016886;MH0003_GL0078036;V1.CD38-0_GL0056648;V1.CD54-0_GL0059679;T2D-135A_GL0030620	Bacterial Non-GH Protein	0	2	7	9	8	8	8	9	0	0	2	2	2	1	2	2	0	0	1	1	1	1	0	1	0	0	3790200	5943900	22578000	29423000	0	13073000
sp|P13647|K2C5_HUMAN;CON__P13647;P13647	Contaminant - Keratin	21	22	15	23	19	14	20	17	13	14	10	15	12	12	9	11	4	4	3	4	4	3	4	3	213650000	339070000	146120000	226760000	227340000	107640000	246130000	159280000
MH0123_GL0131418;MH0003_GL0096781;MH0003_GL0043951;MH0389_GL0011009	Bacterial Non-GH Protein	6	6	6	7	5	6	5	7	0	0	0	1	0	0	0	0	0	0	0	1	0	0	0	0	0	0	0	13431000	0	0	0	0
T2D-135A_GL0108690;MH0003_GL0100023	Unknown	1	1	1	1	0	0	2	1	1	1	1	1	0	2	0	1	1	1	1	1	0	0	2	1	0	0	0	0	0	0	32577000	0
NOF013_GL0068118;N079A_GL0047007;MH0113_GL0044159	Glucuronidase	1	8	0	10	0	6	0	8	0	1	0	1	0	0	1	1	0	0	0	0	0	0	0	0	0	0	0	0	0	0	0	7152300	Mini-Loop 1
MH0003_GL0103155	Bacterial Non-GH Protein	0	0	0	1	0	0	2	2	0	0	0	1	0	2	0	2	0	0	0	1	0	0	2	2	0	0	0	0	0	0	23735000	17368000
MH0066_GL0010765;MH0227_GL0100580;MH0198_GL0031775;MH0206_GL0106354;T2D-51A_GL0146604;MH0452_GL0185325;O2.UC30-1_GL0143928;O2.UC56-2_GL0083550;V1.CD40-0_GL0087304;MH0424_GL0111442;MH0079_GL0012347;T2D-155A_GL0001778;MH0238_GL0154187;MH0402_GL0002046;MH0200_GL0093837;MH0187_GL0087260;MH0014_GL0114787;MH0384_GL0107688;MH0260_GL0024851;MH0006_GL0044156;DOM022_GL0075843;MH0286_GL0024761;O2.UC24-1_GL0…	Bacterial Non-GH Protein	15	15	15	15	10	12	14	13	2	2	2	1	1	2	2	2	0	0	0	0	0	0	0	0	413250000	333350000	63049000	0	0	57970000	113350000	303140000
V1.CD3-0_GL0029398;NOF013_GL0073068;V1.UC26-4_GL0044324;T2D-133A_GL0096999;T2D-113A_GL0009566;N087A_GL0070178;N085A_GL0044701;MH0381_GL0099571;MH0333_GL0051764;MH0121_GL0017652;MH0101_GL0104594;MH0037_GL0030105;MH0011_GL0039185;MH0011_GL0034303;MH0004_GL0029767;MH0004_GL0019784;T2D-207A_GL0000714;MH0402_GL0154568;MH0458_GL0100921;N038A_GL0028087;MH0196_GL0170192;V1.UC41-0_GL0029217;MH0113_GL00015…	Bacterial Non-GH Protein	2	0	3	3	1	2	3	3	2	0	3	3	1	3	2	3	2	0	3	3	1	2	3	3	16105000	0	14851000	25681000	0	13514000	38684000	43027000
MH0004_GL0020684;MH0055_GL0014209;MH0407_GL0035989;DOM005_GL0042041;MH0386_GL0095428;V1.UC57-0_GL0033217;MH0165_GL0080140	Bacterial Non-GH Protein	6	6	4	6	0	1	5	6	1	0	0	0	0	0	0	0	0	0	0	0	0	0	0	0	3685100	0	0	0	0	0	0	0
MH0004_GL0022787	Bacterial Non-GH Protein	4	4	4	5	4	3	4	4	0	0	0	1	0	0	0	0	0	0	0	1	0	0	0	0	0	0	0	1298900	0	0	0	0
MH0004_GL0024446;MH0319_GL0086012;N085A_GL0013855;MH0402_GL0184395;MH0016_GL0047403;MH0002_GL0051314;N087A_GL0043923;T2D-48A_GL0010361;MH0414_GL0114605;MH0093_GL0084829;MH0187_GL0022714;MH0198_GL0066525;MH0143_GL0133979;MH0063_GL0027294	Bacterial Non-GH Protein	2	1	5	5	2	0	7	5	0	0	0	0	0	2	0	2	0	0	0	0	0	0	1	1	0	0	0	0	0	0	12170000	18455000
sp|Q02817|MUC2_HUMAN;Q02817	Other Human Protein	4	7	8	11	7	8	6	5	4	7	8	11	7	6	8	5	4	7	8	11	7	8	6	5	397960000	326290000	227890000	328350000	131800000	179290000	101440000	177250000
MH0005_GL0011009;O2.UC24-1_GL0027053;MH0004_GL0020789;MH0407_GL0047196;MH0037_GL0013923;MH0200_GL0052579;V1.CD38-0_GL0190502;T2D-133A_GL0047436;MH0013_GL0002836;MH0003_GL0043239;T2D-33A_GL0002835;N042A_GL0084559;MH0107_GL0018097;T2D-73A_GL0040568;MH0198_GL0031918;MH0094_GL0108986;MH0012_GL0085263;O2.UC31-1_GL0117811;MH0152_GL0042901;V1.FI12_GL0142722;MH0140_GL0110166;T2D-87A_GL0019992;N040A_GL000…	Bacterial Non-GH Protein	12	11	11	12	3	7	11	12	2	0	1	1	0	0	0	1	0	0	0	0	0	0	0	0	6799000	0	0	0	0	0	0	0
MH0006_GL0007471;V1.FI32_GL0131600	Bacterial Non-GH Protein	0	0	0	0	0	0	1	1	0	0	0	0	0	1	0	1	0	0	0	0	0	0	1	1	0	0	0	0	0	0	0	10881000
SZEY-48A_GL0013369;BGI003A_GL0077262	Glucosidase	0	10	0	9	0	1	0	1	0	8	0	7	0	0	0	0	0	4	0	4	0	0	0	0	0	321120000	0	167710000	0	0	0	0		Type 1
MH0193_GL0007370;MH0127_GL0095801;MH0006_GL0052750	Bacterial Non-GH Protein	0	0	1	1	0	0	0	0	0	0	1	1	0	0	0	0	0	0	1	1	0	0	0	0	0	0	0	13499000	0	0	0	0
sp|Q99895|CTRC_HUMAN;Q99895	Other Human Protein	7	6	7	6	6	5	8	8	7	6	7	6	6	8	5	8	7	6	7	6	6	5	8	8	348370000	318950000	243210000	402440000	262320000	387200000	1184800000	1008800000
MH0006_GL0076055	Bacterial Non-GH Protein	1	0	2	4	0	0	1	1	0	0	1	3	0	1	0	0	0	0	1	3	0	0	1	0	0	0	0	16118000	0	0	0	0
V1.CD17-0_GL0009837;MH0006_GL0124546	Bacterial Non-GH Protein	2	3	2	2	3	3	3	3	1	1	0	0	1	1	1	1	1	1	0	0	1	1	1	1	0	0	0	0	0	0	0	2636200
N085A_GL0048167;MH0026_GL0035479;MH0007_GL0039504;T2D-48A_GL0112382;MH0061_GL0027274;MH0402_GL0117553;T2D-133A_GL0047455;T2D-113A_GL0024401;N087A_GL0112112;MH0381_GL0074429;MH0203_GL0182046;MH0006_GL0148368;DOM005_GL0025443;MH0097_GL0037368	Bacterial Non-GH Protein	4	5	4	7	2	3	7	8	1	1	1	1	0	2	0	2	0	0	0	0	0	0	0	0	0	0	0	0	0	0	0	20190000
MH0086_GL0082494;V1.CD55-0_GL0249199	Other Bacterial GH Protein	0	12	0	12	0	4	0	3	0	12	0	12	0	0	4	3	0	7	0	7	0	2	0	1	0	317460000	0	241150000	0	7848600	0	3450200
MH0010_GL0014680;V1.CD38-0_GL0154733;SZEY-78A_GL0018536;MH0355_GL0085031;V1.UC3-0_GL0046543;MH0299_GL0069448;T2D-6A_GL0096896;MH0267_GL0216258;MH0357_GL0133480;MH0336_GL0097832;V1.UC44-0_GL0038140;MH0368_GL0013969;MH0389_GL0054464;DOM022_GL0072438;MH0006_GL0014624;V1.UC52-1_GL0188607	Bacterial Non-GH Protein	1	2	4	4	1	3	1	0	0	1	3	3	1	0	3	0	0	1	1	1	0	2	0	0	0	0	35434000	25440000	0	14497000	0	0
sp|P15086|CBPB1_HUMAN;P15086	Other Human Protein	11	11	12	11	12	12	6	5	11	11	12	11	12	6	12	5	10	11	11	10	11	11	5	5	302160000	317020000	263850000	274830000	1442900000	1343300000	62932000	74081000
NOF012_GL0023281;MH0010_GL0041068	Bacterial Non-GH Protein	2	1	0	0	0	0	0	0	2	1	0	0	0	0	0	0	2	1	0	0	0	0	0	0	13598000	0	0	0	0	0	0	0
sp|P02766|TTHY_HUMAN;P02766	Other Human Protein	5	5	6	6	5	5	5	5	5	5	6	6	5	5	5	5	5	5	6	6	5	5	5	5	577720000	265690000	256720000	144380000	326280000	294910000	157260000	145350000
MH0011_GL0010903	Other Bacterial GH Protein	0	5	0	12	0	1	0	0	0	0	0	1	0	0	0	0	0	0	0	1	0	0	0	0	0	0	0	19132000	0	0	0	0
sp|Q13228|SBP1_HUMAN;Q13228	Other Human Protein	17	15	13	16	15	16	9	11	17	15	13	16	15	9	16	11	17	15	13	16	15	16	9	11	260690000	259650000	130860000	176000000	253950000	342300000	60343000	81452000
MH0011_GL0055652	Glucosidase	0	3	0	3	0	1	0	4	0	1	0	1	0	0	0	2	0	1	0	1	0	0	0	2	0	0	0	0	0	0	0	355630000		Type 2
sp|P35237|SPB6_HUMAN;P35237	Other Human Protein	15	12	14	13	14	14	9	8	15	12	14	13	14	9	14	8	15	12	14	13	14	14	9	8	353160000	250200000	221660000	196280000	340990000	351830000	76438000	95726000
V1.UC26-4_GL0134315;O2.UC24-1_GL0134400;MH0198_GL0175133;MH0093_GL0010665;MH0011_GL0069672;MH0187_GL0019186;MH0063_GL0011874;MH0143_GL0056077	Bacterial Non-GH Protein	4	2	3	4	2	2	3	3	1	1	1	1	1	1	1	1	0	0	0	0	0	0	0	0	0	0	0	0	0	0	0	43987000
MH0011_GL0101861;MH0377_GL0172495;MH0197_GL0080609;MH0100_GL0055533;MH0457_GL0049741;MH0336_GL0103206	Bacterial Non-GH Protein	7	7	15	16	12	12	9	7	1	1	4	4	1	1	1	0	0	0	2	2	0	0	0	0	0	0	90769000	79555000	0	0	0	0
sp|P02533|K1C14_HUMAN;CON__P02533;P02533;CON__Q61782	Contaminant - Keratin	12	16	12	15	10	9	14	12	10	13	10	12	8	11	7	9	2	3	1	3	1	1	2	2	197410000	248460000	170040000	238740000	197770000	76503000	180110000	150000000
MH0166_GL0024570	Other Bacterial GH Protein	0	8	0	4	0	6	0	5	0	2	0	0	0	0	0	0	0	2	0	0	0	0	0	0	0	248260000	0	0	0	0	0	0
O2.UC40-0_GL0050432;NOF013_GL0041816;MH0057_GL0001906	Unknown	0	13	0	10	1	2	0	19	0	13	0	10	1	0	2	19	0	13	0	10	1	2	0	19	0	245400000	0	173840000	0	15774000	0	1842800000
MH0012_GL0232564;MH0055_GL0031631	Bacterial Non-GH Protein	1	1	1	2	0	0	7	8	1	1	1	2	0	7	0	8	1	1	1	2	0	0	7	8	0	0	0	33948000	0	0	117680000	86801000
T2D-63A_GL0009376;MH0086_GL0020286;MH0286_GL0094134;MH0337_GL0086023;DLF012_GL0023651;MH0386_GL0144911	Glucosidase	0	19	0	27	0	1	0	0	0	19	0	27	0	0	1	0	0	19	0	27	0	1	0	0	0	240950000	0	886100000	0	0	0	0		Type 2
MH0290_GL0098639;MH0355_GL0123377;MH0385_GL0034766;MH0076_GL0056447;V1.UC19-0_GL0059054;MH0199_GL0181782;MH0198_GL0007183;MH0035_GL0001171;MH0260_GL0149425	Bacterial Non-GH Protein	6	6	9	9	5	7	3	3	6	6	9	9	5	3	7	3	0	0	1	1	1	1	0	0	206790000	229940000	474270000	508980000	85722000	129240000	74439000	84612000
V1.UC5-0_GL0101115;MH0411_GL0082960;O2.UC12-1_GL0058191;MH0002_GL0022747;T2D-33A_GL0061162;V1.CD34-0_GL0102807;MH0191_GL0025242;MH0330_GL0003719;T2D-45A_GL0050301;O2.UC15-1_GL0105201;MH0286_GL0043392;V1.CD13-0_GL0014159;V1.UC55-4_GL0230644	Bacterial Non-GH Protein	9	7	10	11	8	7	0	0	9	7	10	11	8	0	7	0	4	3	4	5	4	3	0	0	206500000	225460000	453760000	587090000	138070000	176510000	0	0
V1.CD3-0-PN_GL0029963;MH0113_GL0044635;MH0014_GL0097483;MH0127_GL0033064;MH0343_GL0156151;V1.CD12-3_GL0043692	Bacterial Non-GH Protein	6	6	6	5	6	6	6	6	1	1	1	1	1	1	1	1	0	0	0	0	0	0	0	0	40815000	0	0	0	13197000	0	0	0
MH0233_GL0025863;HT14A_GL0134158	Glucuronidase	0	1	1	6	0	3	0	7	0	0	1	6	0	0	2	6	0	0	1	6	0	2	0	6	0	0	0	53717000	0	81871000	0	150540000	No loop
MH0019_GL0037003;MH0014_GL0101523;T2D-133A_GL0086731;MH0402_GL0015541;T2D-113A_GL0007417;N087A_GL0005089;MH0006_GL0198566;O2.UC50-0_GL0295252;MH0101_GL0000217	Bacterial Non-GH Protein	1	3	6	8	7	7	8	9	0	1	1	3	2	3	2	4	0	0	0	0	0	0	0	1	0	0	0	7431500	19544000	31120000	23455000	39546000
V1.UC50-1_GL0018359;O2.UC8-2_GL0129696;O2.UC41-1_GL0051648;O2.CD3-0-PT_GL0106077;MH0370_GL0053023;V1.CD27-0_GL0039112;O2.UC40-1_GL0178607;V1.UC8-0_GL0057512;O2.UC8-2_GL0159739;V1.UC35-4_GL0176075;MH0308_GL0043167;MH0382_GL0009018;O2.UC41-1_GL0117266;O2.UC48-0_GL0173458;V1.CD3-0-PN_GL0120086;MH0020_GL0010638;MH0193_GL0190834;MH0281_GL0113191;O2.CD3-0-PT_GL0123443;MH0247_GL0088504;MH0088_GL0106695;…	Bacterial Non-GH Protein	5	5	5	5	5	5	5	5	5	5	5	5	5	5	5	5	3	3	3	3	3	3	3	3	202400000	223960000	172890000	94623000	92829000	100120000	201840000	180450000
MH0077_GL0047666;MH0015_GL0026987;MH0078_GL0010399;MH0019_GL0033668;MH0374_GL0188642;MH0162_GL0103672;MH0134_GL0065366	Bacterial Non-GH Protein	3	2	1	1	3	3	0	1	1	0	0	0	0	0	0	0	1	0	0	0	0	0	0	0	2381000	0	0	0	0	0	0	0
T2D-22A_GL0062460;MH0274_GL0029931;V1.CD3-3-PN_GL0049796;T2D-51A_GL0022090;MH0016_GL0004818	Bacterial Non-GH Protein	1	0	1	1	0	0	1	1	0	0	1	0	0	0	0	0	0	0	1	0	0	0	0	0	0	0	4125300	0	0	0	0	0
MH0016_GL0027175	Bacterial Non-GH Protein	4	5	7	7	3	5	8	9	1	1	1	1	0	1	0	2	0	0	0	0	0	0	0	0	0	0	0	0	0	0	0	26246000
sp|P02538|K2C6A_HUMAN;CON__P02538;P02538;sp|P48668|K2C6C_HUMAN;CON__P48668;CON__P04259;P48668;sp|O95678|K2C75_HUMAN;CON__O95678;O95678;CON__Q8VED5;CON__Q9H552	Contaminant - Keratin	17	21	15	21	18	11	17	14	5	8	6	8	7	6	2	4	1	1	1	1	1	0	1	1	106600000	219640000	57899000	67733000	141470000	15752000	47554000	26924000
V1.CD3-0-PN_GL0120088;V1.UC59-0_GL0117936;V1.FI36_GL0200034;O2.UC9-0_GL0128251;O2.UC6-0_GL0050099;O2.UC16-2_GL0048173;O2.CD3-0-PT_GL0106079;MH0375_GL0078852;MH0211_GL0074815;T2D-149A_GL0033139;MH0371_GL0037608;MH0016_GL0056368;V1.FI07_GL0051232;O2.UC35-1_GL0182967;MH0448_GL0008263;V1.CD49-0_GL0138425;MH0350_GL0206766;V1.UC10-2_GL0021493;V1.UC55-0_GL0181905;V1.CD21-0_GL0051197;T2D-31A_GL0076721;O2…	Bacterial Non-GH Protein	3	3	2	3	2	3	3	3	1	1	0	1	0	1	1	1	1	1	0	1	0	1	1	1	0	0	0	0	0	0	0	4851000
MH0088_GL0125029;MH0110_GL0036872;MH0233_GL0062396	Bacterial Non-GH Protein	12	11	7	5	2	3	6	9	11	10	6	4	1	5	2	8	1	0	0	0	0	0	0	0	222790000	217420000	68306000	90768000	0	37734000	77984000	152330000
MH0019_GL0001172;O2.UC12-1_GL0058190;MH0009_GL0070723;MH0456_GL0073833;O2.UC32-1_GL0089095;MH0143_GL0070713;MH0111_GL0119634;MH0035_GL0055230;MH0270_GL0089772;MH0090_GL0095371;ED20A_GL0057515;MH0305_GL0026573;MH0253_GL0037037;MH0206_GL0131737	Bacterial Non-GH Protein	7	7	6	6	2	4	4	4	1	1	1	1	0	1	0	1	0	0	0	0	0	0	0	0	0	0	0	13575000	0	0	0	0
sp|Q8WZ42|TITIN_HUMAN;Q8WZ42	Other Human Protein	7	6	8	8	5	5	9	9	7	6	8	8	5	9	5	9	7	6	8	8	5	5	9	9	384510000	215770000	326970000	200180000	1962100000	1801100000	3223900000	2237000000
MH0060_GL0028392;MH0274_GL0039358;MH0037_GL0027467;MH0025_GL0039943;MH0193_GL0063918;MH0094_GL0002446;MH0041_GL0068792	Bacterial Non-GH Protein	7	6	2	3	0	3	3	5	1	1	0	1	0	1	0	1	0	0	0	0	0	0	0	0	0	0	0	0	0	0	0	21065000
MH0026_GL0016898;NLM015_GL0063364;MH0286_GL0087674;MH0402_GL0083435;DLF010_GL0066922;T2D-12A_GL0090877;T2D-53A_GL0078686;MH0045_GL0039379;MH0229_GL0199115;MH0127_GL0036526;V1.FI09_GL0150458;MH0030_GL0031051;V1.UC63-0_GL0178972;MH0036_GL0016436;MH0456_GL0001261;MH0187_GL0110400;MH0097_GL0000429;DLF010_GL0005085;MH0247_GL0011010;MH0267_GL0116409;MH0376_GL0188146;MH0346_GL0152513;MH0195_GL0090079;MH…	Bacterial Non-GH Protein	4	3	1	1	1	1	3	4	2	1	0	0	0	0	0	1	2	1	0	0	0	0	0	1	5211700	0	0	0	0	0	0	0
V1.CD38-0_GL0081541;O2.UC12-1_GL0094353;MH0044_GL0027435;MH0026_GL0020802;NLM026_GL0023572;O2.UC18-1_GL0090985;MH0067_GL0066230;MH0131_GL0106885;V1.UC12-4_GL0135749;MH0111_GL0063202;MH0170_GL0130572;MH0355_GL0148797;MH0054_GL0032645;V1.FI14_GL0134626;MH0257_GL0127135;MH0196_GL0104425;MH0063_GL0018899;MH0384_GL0042581;O2.UC36-0_GL0020127;O2.UC31-0_GL0068267;MH0389_GL0109229;V1.UC11-5_GL0069473;V1.…	Bacterial Non-GH Protein	2	3	2	4	2	2	2	1	1	2	1	2	1	0	1	0	1	2	1	2	1	1	0	0	0	0	0	0	0	5290100	0	0
sp|P05787|K2C8_HUMAN;CON__P05787;P05787;CON__H-INV:HIT000292931;CON__H-INV:HIT000016045	Contaminant - Keratin	8	8	5	6	5	5	5	5	3	3	1	1	1	0	1	0	3	3	1	1	1	1	0	0	384320000	214070000	0	0	0	0	0	0
MH0020_GL0029900;MH0115_GL0021528;MH0074_GL0060693;MH0266_GL0078219;MH0167_GL0027951;MH0290_GL0149540;O2.UC43-1_GL0009521;T2D-155A_GL0046883;O2.UC58-2_GL0022849;MH0281_GL0012091;MH0025_GL0086634;MH0179_GL0043555;MH0407_GL0080674;V1.UC41-0_GL0019308	Glucosidase	1	13	0	5	0	5	0	6	0	8	0	0	0	0	0	1	0	7	0	0	0	0	0	1	0	206210000	0	0	0	0	0	0		Type 2
sp|B9A064|IGLL5_HUMAN;B9A064;sp|P0CG04|LAC1_HUMAN;P0CG04	Other Human Protein	3	3	4	4	3	4	3	3	3	3	4	4	3	3	4	3	1	1	2	2	1	2	1	1	325110000	197720000	2722100000	3654400000	2219200000	1966900000	135990000	62066000
V1.UC53-0_GL0129574;O2.UC4-2_GL0109748	Glucosidase	0	16	0	15	0	18	0	12	0	4	0	2	0	0	4	1	0	3	0	1	0	3	0	0	0	194200000	0	17845000	0	116850000	0	0		Type 1
MH0031_GL0024311	Bacterial Non-GH Protein	5	5	5	4	1	2	2	2	0	0	1	0	0	0	0	0	0	0	0	0	0	0	0	0	0	0	5764100	0	0	0	0	0
MH0035_GL0001172;NLF013_GL0014417;V1.UC55-4_GL0130966	Bacterial Non-GH Protein	3	3	4	3	1	3	3	3	0	0	0	0	0	1	1	1	0	0	0	0	0	1	1	1	0	0	0	0	0	0	0	16114000
MH0037_GL0001415	Other Bacterial GH Protein	0	7	0	9	0	8	0	9	0	0	0	1	0	0	0	1	0	0	0	1	0	0	0	1	0	0	0	0	0	0	0	4500800
MH0037_GL0047538	Bacterial Non-GH Protein	7	10	12	15	14	14	14	11	0	0	0	1	1	1	1	0	0	0	0	0	0	0	0	0	0	0	0	0	0	3212400	0	0
MH0039_GL0013451;MH0276_GL0013796	Other Bacterial GH Protein	1	2	1	6	0	2	0	0	0	0	0	3	0	0	0	0	0	0	0	3	0	0	0	0	0	0	0	33536000	0	0	0	0
MH0041_GL0008600;MH0275_GL0021402;MH0274_GL0015782	Bacterial Non-GH Protein	0	0	0	0	0	0	2	1	0	0	0	0	0	2	0	1	0	0	0	0	0	0	2	1	0	0	0	0	0	0	10648000	0
MH0041_GL0009150	Bacterial Non-GH Protein	3	3	4	6	2	4	6	6	0	0	0	1	0	1	0	1	0	0	0	0	0	0	0	0	0	0	0	0	0	0	0	3766400
MH0041_GL0014483;V1.FI06_GL0218191;MH0103_GL0081275	Bacterial Non-GH Protein	1	0	0	1	0	0	2	2	0	0	0	0	0	1	0	1	0	0	0	0	0	0	1	1	0	0	0	0	0	0	0	8559700
MH0041_GL0040403;O2.UC12-1_GL0096658;MH0131_GL0053293;V1.CD49-0_GL0177779	Bacterial Non-GH Protein	5	7	11	13	10	9	10	8	0	0	0	1	1	0	0	0	0	0	0	0	0	0	0	0	0	0	0	0	326710	0	0	0
MH0041_GL0075170	Glucosidase	0	24	1	19	0	18	0	23	0	1	0	2	0	0	0	2	0	0	0	1	0	0	0	0	0	0	0	44444000	0	0	0	0		Type 2
MH0314_GL0028168;MH0055_GL0065205;MH0046_GL0035122;O2.UC1-1_GL0117671;MH0004_GL0000042;MH0003_GL0104436;MH0069_GL0045661	Bacterial Non-GH Protein	3	3	4	3	2	3	5	4	1	1	1	1	1	1	1	0	0	0	0	0	0	0	0	0	0	0	0	0	0	12430000	0	0
MH0355_GL0200140;MH0314_GL0137084;MH0046_GL0043238;MH0274_GL0063082;MH0133_GL0023961;MH0101_GL0013780;MH0012_GL0085267;NOF010_GL0092147	Bacterial Non-GH Protein	4	5	5	9	3	3	7	10	1	1	1	1	0	1	0	1	0	0	0	0	0	0	0	0	0	0	0	0	0	0	0	28923000
MH0407_GL0196630;MH0281_GL0022895;MH0047_GL0016318;MH0415_GL0148934;MH0386_GL0155340;MH0351_GL0055200;MH0046_GL0044250;MH0192_GL0016448;MH0265_GL0157200;V1.UC41-0_GL0011562;MH0330_GL0187084	Bacterial Non-GH Protein	3	5	4	5	2	1	4	4	0	1	0	1	0	0	0	0	0	1	0	1	0	0	0	0	0	0	0	14457000	0	0	0	0
MH0281_GL0109965;MH0047_GL0040188;MH0265_GL0130530;MH0407_GL0096077;MH0192_GL0015106;MH0189_GL0063908;V1.UC25-0_GL0014975;NOF013_GL0074938;MH0435_GL0113679;MH0243_GL0037118;MH0113_GL0081327;MH0069_GL0019101;MH0006_GL0031884;SZEY-101A_GL0058785;MH0314_GL0161959;V1.CD27-0_GL0129970;MH0055_GL0035266;MH0046_GL0005678;MH0337_GL0085771;O2.UC8-0_GL0104590;O2.UC1-1_GL0132682;MH0057_GL0006770;MH0011_GL005…	Bacterial Non-GH Protein	0	1	2	3	0	0	1	2	0	0	1	1	0	1	0	1	0	0	1	1	0	0	1	1	0	0	0	0	0	0	0	5414100
MH0048_GL0045161;MH0275_GL0176895;T2D-11A_GL0129836;V1.FI03_GL0084434;MH0229_GL0159032;MH0367_GL0166318;V1.UC16-0_GL0076413;MH0307_GL0124008;MH0447_GL0205250;MH0144_GL0014147;MH0448_GL0121351;V1.UC11-5_GL0184121;V1.UC13-3_GL0020968;O2.UC20-1_GL0027122;O2.UC47-1_GL0157909;V1.CD55-0_GL0023821;HT25A_GL0010703;MH0257_GL0070647	Bacterial Non-GH Protein	3	4	5	6	4	4	7	7	0	0	1	2	0	2	0	3	0	0	1	1	0	0	2	2	0	0	0	0	0	0	0	21487000
MH0051_GL0036999	Bacterial Non-GH Protein	0	2	5	8	7	7	7	7	0	0	0	0	1	0	1	0	0	0	0	0	0	0	0	0	0	0	0	0	0	13642000	0	0
MH0260_GL0099478;MH0144_GL0148351;MH0053_GL0000137;MH0421_GL0080121;O2.UC52-0_GL0026177;MH0370_GL0034577;MH0262_GL0117438;MH0138_GL0050243;V1.FI04_GL0078427;MH0157_GL0034909;MH0130_GL0072608;MH0193_GL0010477;MH0276_GL0191103;T2D-132A_GL0013096;MH0329_GL0024566;V1.UC39-0_GL0097324;V1.UC55-0_GL0109714;O2.UC27-1_GL0011869;MH0148_GL0024505;V1.UC11-5_GL0187527;V1.UC50-1_GL0103408;MH0031_GL0023235;V1.U…	Bacterial Non-GH Protein	2	2	4	3	1	2	4	4	0	0	1	1	0	0	1	0	0	0	1	1	0	1	0	0	0	0	0	0	0	3899500	0	0
MH0053_GL0015710	Bacterial Non-GH Protein	1	1	0	1	0	0	1	0	0	0	0	0	0	1	0	0	0	0	0	0	0	0	1	0	0	0	0	0	0	0	7024800	0
MH0101_GL0073989;MH0054_GL0010223;MH0012_GL0091405;T2D-48A_GL0009800;N085A_GL0082718;MH0414_GL0042367;MH0061_GL0014672;MH0016_GL0051441;MH0004_GL0034020;DOM005_GL0011592;NOF010_GL0063157;MH0101_GL0047110;MH0037_GL0031909;MH0333_GL0068744	Bacterial Non-GH Protein	3	2	3	3	1	1	2	2	0	0	1	1	0	0	0	0	0	0	0	0	0	0	0	0	0	0	0	7673800	0	0	0	0
MH0141_GL0041536;O2.UC15-2_GL0106371	Glucosidase	0	6	0	5	1	2	0	0	0	6	0	5	1	0	2	0	0	4	0	3	1	1	0	0	0	188470000	0	32646000	0	0	0	0		Type 2
MH0100_GL0129471;MH0055_GL0031824;MH0359_GL0113801;MH0227_GL0142400;V1.UC49-0_GL0039047;sp|P49411|EFTU_HUMAN;P49411	Bacterial Non-GH Protein	2	1	3	2	1	1	5	5	2	1	3	2	1	5	1	5	2	1	3	2	1	1	5	5	0	0	0	21545000	0	0	221450000	72017000
MH0122_GL0084317;NLM021_GL0036063	Bacterial Non-GH Protein	2	4	10	11	5	4	2	6	2	4	10	11	5	2	4	6	0	0	1	2	0	0	0	1	302280000	185380000	2587600000	2434700000	240090000	200620000	25541000	21599000
MH0057_GL0037260	Bacterial Non-GH Protein	10	10	14	16	11	10	15	15	1	1	2	2	1	1	2	2	0	0	0	0	0	0	0	0	0	0	30791000	55974000	0	20241000	0	24046000
V1.CD20-0_GL0087385;MH0058_GL0009365	Bacterial Non-GH Protein	1	1	1	0	0	0	0	0	0	0	1	0	0	0	0	0	0	0	1	0	0	0	0	0	0	0	0	0	0	0	0	0
sp|P15085|CBPA1_HUMAN;P15085;CON__Q2KIG3	Other Human Protein	10	7	9	11	12	11	4	6	9	7	8	10	11	3	10	6	9	7	8	10	11	10	3	6	263770000	184980000	419310000	350700000	1138900000	1047500000	44216000	62287000
sp|P06702|S10A9_HUMAN;P06702	Other Human Protein	5	5	5	4	2	2	5	3	5	5	5	4	2	5	2	3	5	5	5	4	2	2	5	3	242670000	184290000	65374000	52395000	16119000	10226000	47441000	64593000
sp|Q9UKX2|MYH2_HUMAN;Q9UKX2;sp|P12882|MYH1_HUMAN;P12882;sp|P13535|MYH8_HUMAN;P13535;sp|Q9Y623|MYH4_HUMAN;Q9Y623;sp|Q9UKX3|MYH13_HUMAN;Q9UKX3	Other Human Protein	10	10	5	6	1	2	8	8	10	10	5	6	1	8	2	8	6	5	2	2	1	1	3	3	138270000	173220000	12776000	14067000	0	15631000	51906000	64019000
MH0061_GL0029665	Bacterial Non-GH Protein	2	1	5	7	2	0	6	5	1	0	1	2	0	2	0	2	0	0	0	1	0	0	1	1	0	0	0	5043400	0	0	14725000	25147000
T2D-48A_GL0068947;O2.UC53-0_GL0211803;MH0199_GL0110037;T2D-113A_GL0053378;MH0173_GL0018224;MH0104_GL0092990;N085A_GL0075462;MH0402_GL0000056;MH0381_GL0106298;T2D-118A_GL0020203;MH0195_GL0106629;MH0188_GL0010749;MH0101_GL0022245;MH0101_GL0019525;MH0049_GL0018407;MH0038_GL0059301;MH0011_GL0104081;DOM005_GL0017739;V1.UC37-0_GL0065870;MH0006_GL0078461;V1.CD22-0_GL0032331;MH0149_GL0129418;MH0260_GL002…	Bacterial Non-GH Protein	6	5	5	6	1	2	6	4	6	5	5	6	1	6	2	4	3	3	3	3	0	0	3	2	236690000	170940000	71690000	59524000	0	52494000	179070000	153670000
MH0062_GL0002041;MH0454_GL0117215;MH0153_GL0101704;MH0434_GL0077609;MH0262_GL0146961;MH0188_GL0082963;MH0150_GL0068771;MH0144_GL0045488;MH0102_GL0009515;MH0064_GL0034270;MH0370_GL0010917;MH0399_GL0156612;MH0092_GL0146391;MH0167_GL0014444;MH0410_GL0147909;V1.UC35-0_GL0052409;V1.UC26-0_GL0007549;T2D-54A_GL0133134;O2.UC36-0_GL0158681;DLF014_GL0051176	Bacterial Non-GH Protein	10	11	10	10	9	9	7	9	1	1	1	1	1	1	0	1	0	0	0	0	0	0	0	0	0	0	0	0	0	0	0	64725000
MH0062_GL0007930;SZEY-95A_GL0014210	Bacterial Non-GH Protein	1	0	0	0	0	0	0	0	1	0	0	0	0	0	0	0	1	0	0	0	0	0	0	0	8504300	0	0	0	0	0	0	0
MH0346_GL0086270	Glucosidase	1	19	0	17	0	18	1	19	0	3	0	1	0	0	1	3	0	2	0	0	0	0	0	2	0	165780000	0	0	0	0	0	24004000		Type 2
sp|P59666|DEF3_HUMAN;sp|P59665|DEF1_HUMAN;P59666;P59665	Other Human Protein	2	2	2	2	2	2	2	2	2	2	2	2	2	2	2	2	2	2	2	2	2	2	2	2	61792000	163990000	36418000	43978000	72487000	57244000	122040000	31786000
MH0062_GL0054120	Bacterial Non-GH Protein	1	1	3	2	0	0	0	0	1	1	3	2	0	0	0	0	1	1	3	2	0	0	0	0	0	0	101950000	18228000	0	0	0	0
MH0063_GL0015627	Other Bacterial GH Protein	0	0	0	0	0	9	0	1	0	0	0	0	0	0	1	0	0	0	0	0	0	1	0	0	0	0	0	0	0	383890000	0	0
MH0064_GL0038115	Bacterial Non-GH Protein	2	3	5	8	4	5	4	6	0	0	1	1	0	1	0	0	0	0	0	0	0	0	0	0	0	0	0	0	0	0	443860	0
MH0064_GL0038281	Bacterial Non-GH Protein	1	1	2	3	0	0	0	0	1	1	1	1	0	0	0	0	1	1	1	1	0	0	0	0	0	0	0	13420000	0	0	0	0
NLF014_GL0011588;MH0402_GL0203880;O2.UC55-0_GL0119486;MH0093_GL0069536;MH0444_GL0008052;MH0055_GL0070153;O2.UC48-1_GL0249398;MH0197_GL0068058	Glucosidase	1	18	0	16	0	9	0	20	0	7	0	4	0	0	4	8	0	1	0	0	0	1	0	1	0	158500000	0	17959000	0	17954000	0	175610000		Type 2
MH0067_GL0006089;MH0113_GL0004363	Glucosidase	0	10	0	12	0	4	0	12	0	1	0	1	0	0	1	1	0	0	0	0	0	0	0	0	0	0	0	0	0	0	0	10198000		Type 2
MH0325_GL0139967	Glucosidase	1	11	0	22	0	4	0	22	1	10	0	21	0	0	3	21	0	1	0	5	0	0	0	5	0	158090000	0	1489800000	0	16245000	0	1806100000		Type 2
sp|P62805|H4_HUMAN;P62805	Other Human Protein	2	2	2	2	0	1	2	2	2	2	2	2	0	2	1	2	2	2	2	2	0	1	2	2	32110000	152930000	25787000	23069000	0	0	63014000	48695000
MH0067_GL0024100;NLF012_GL0075021	Glucosidase	0	0	0	5	0	0	0	0	0	0	0	5	0	0	0	0	0	0	0	5	0	0	0	0	0	0	0	25684000	0	0	0	0		Type 2
MH0381_GL0193258;SZEY-07A_GL0002028;MH0067_GL0025425	Bacterial Non-GH Protein	0	0	1	1	0	0	1	1	0	0	1	1	0	1	0	1	0	0	1	1	0	0	1	1	0	0	75634000	0	0	0	0	0
MH0068_GL0009286	Bacterial Non-GH Protein	3	4	5	5	0	2	3	3	0	0	1	1	0	1	0	1	0	0	1	1	0	0	1	1	0	0	0	0	0	0	0	3407100
MH0325_GL0031693	Glucuronidase	1	7	0	10	0	5	0	8	0	0	0	2	0	0	0	1	0	0	0	2	0	0	0	1	0	0	0	42344000	0	0	0	0	Mini-Loop 1
T2D-135A_GL0031528	Glucuronidase	0	6	0	8	0	5	0	6	0	1	0	1	0	0	1	1	0	1	0	1	0	1	0	1	0	0	0	0	0	0	0	207500000	Mini-Loop 1
MH0071_GL0029240	Bacterial Non-GH Protein	10	6	10	13	5	5	11	10	1	0	1	1	0	1	0	0	1	0	1	1	0	0	1	0	13228000	0	0	20177000	0	0	50962000	0
MH0073_GL0010984	Bacterial Non-GH Protein	0	0	5	8	2	2	0	0	0	0	5	8	2	0	2	0	0	0	5	8	2	2	0	0	0	0	30241000	150250000	10262000	25440000	0	0
MH0054_GL0017184;MH0101_GL0047724	Glucuronidase	2	3	0	4	0	4	0	8	1	0	0	0	0	0	0	4	1	0	0	0	0	0	0	4	0	0	0	0	0	0	0	37159000	Mini-Loop 1
MH0073_GL0051020;MH0441_GL0134132;V1.CD52-0_GL0216318;MH0012_GL0111330;MH0006_GL0158080;MH0169_GL0009146;MH0360_GL0072354	Other Bacterial GH Protein	0	0	0	3	0	4	0	0	0	0	0	0	0	0	1	0	0	0	0	0	0	1	0	0	0	0	0	0	0	4073000	0	0
MH0076_GL0011524;MH0095_GL0100206	Bacterial Non-GH Protein	6	4	15	16	11	12	12	13	0	0	2	2	0	2	0	2	0	0	1	1	0	0	1	1	0	0	9833400	4951700	0	0	24460000	15977000
MH0079_GL0010970;MH0126_GL0128792;MH0069_GL0010472;MH0152_GL0077484	Bacterial Non-GH Protein	5	4	1	1	0	1	2	3	1	0	0	0	0	0	0	0	1	0	0	0	0	0	0	0	4740700	0	0	0	0	0	0	0
MH0079_GL0031559	Bacterial Non-GH Protein	4	4	3	4	3	4	5	5	0	0	0	1	0	1	0	1	0	0	0	0	0	0	0	0	0	0	0	0	0	0	0	6241400
MH0420_GL0095267;MH0080_GL0076675	Bacterial Non-GH Protein	2	2	1	2	1	1	1	2	1	1	0	1	0	0	0	1	1	1	0	1	0	0	0	1	0	0	0	0	0	0	0	1616700
MH0083_GL0093270	Bacterial Non-GH Protein	0	0	1	1	0	0	5	5	0	0	1	1	0	5	0	5	0	0	1	1	0	0	5	5	0	0	0	0	0	0	68432000	113430000
sp|P01871|IGHM_HUMAN;P01871;sp|P04220|MUCB_HUMAN;P04220	Other Human Protein	4	6	5	7	4	5	3	3	4	6	5	7	4	3	5	3	4	6	5	7	4	5	3	3	173450000	148250000	856100000	1245000000	744380000	298650000	109180000	226000000
MH0085_GL0053898;MH0381_GL0018764	Glucosidase	0	18	0	18	0	18	1	16	0	1	0	1	0	0	0	0	0	1	0	1	0	0	0	0	0	0	0	58138000	0	0	0	0		Type 2
sp|P04406|G3P_HUMAN;P04406	Other Human Protein	6	7	6	6	5	6	6	6	6	7	6	6	5	6	6	6	6	7	6	6	5	6	6	6	212230000	146780000	91351000	140030000	105810000	100080000	165520000	151020000
CON__P02662	Contaminant - Other	1	4	3	3	2	3	2	1	1	4	3	3	2	2	3	1	1	4	3	3	2	3	2	1	0	144160000	5469800	4120500	6812800	5099600	7091000	0
T2D-192A_GL0021810;MH0402_GL0024002	Other Bacterial GH Protein	0	9	0	10	0	10	0	11	0	9	0	10	0	0	10	11	0	2	0	2	0	2	0	3	0	143470000	0	129810000	0	220950000	0	531600000
MH0086_GL0044825	Bacterial Non-GH Protein	4	5	6	5	2	4	3	2	1	1	2	1	0	1	0	1	0	0	0	0	0	0	0	0	0	0	8919400	0	0	0	0	0
V1.CD40-0_GL0133600	Unknown	7	7	6	7	2	2	6	8	7	7	6	7	2	6	2	8	7	7	6	7	2	2	6	8	203960000	142140000	205310000	95622000	53678000	49450000	143670000	71066000
MH0002_GL0002105;N085A_GL0086951;MH0414_GL0090636;DOM005_GL0026841;MH0198_GL0046261;MH0016_GL0004900;T2D-48A_GL0085176;MH0129_GL0007405;NLF006_GL0041201;MH0381_GL0134698;V1.UC26-4_GL0035109;MH0011_GL0011745;MH0127_GL0037208;O2.UC24-1_GL0164419;MH0407_GL0174691;MH0025_GL0041876	Bacterial Non-GH Protein	9	9	4	8	1	1	9	8	9	9	4	8	1	9	1	8	3	3	0	1	0	0	3	2	136080000	139650000	105100000	128610000	0	0	147420000	279660000
V1.UC53-0_GL0024756;MH0206_GL0033331;MH0086_GL0116500;O2.UC48-1_GL0179068;V1.UC28-0_GL0065875;T2D-157A_GL0050332;T2D-149A_GL0108023;NOM002_GL0070724;T2D-53A_GL0020757;O2.CD3-0-PT_GL0113025;DOF008_GL0036740;MH0188_GL0051444	Bacterial Non-GH Protein	3	4	2	4	2	4	4	3	1	1	0	1	0	1	1	0	1	1	0	1	0	1	1	0	0	0	0	0	0	3133000	0	0
T2D-149A_GL0068478;MH0375_GL0084796;MH0122_GL0041475;MH0060_GL0062708;MH0011_GL0055430;SZEY-58A_GL0029415;V1.FI07_GL0110903;MH0161_GL0076162;MH0062_GL0039997;MH0017_GL0034510;NLM031_GL0010810;T2D-12A_GL0027123;O2.UC47-1_GL0135390;MH0313_GL0092749;MH0054_GL0039297;MH0012_GL0231760;MH0454_GL0245358;MH0212_GL0064790;MH0313_GL0004376;MH0351_GL0060265;MH0366_GL0032708;MH0360_GL0136023;MH0244_GL0101168…	Bacterial Non-GH Protein	3	4	6	7	2	2	8	8	3	4	6	7	2	8	2	8	0	0	2	3	0	0	3	3	227690000	139060000	214220000	184090000	211190000	288440000	475990000	382940000
MH0087_GL0004799;V1.CD32-0_GL0008500;MH0206_GL0168517;MH0071_GL0050370;V1.UC16-0_GL0003690;V1.CD21-4_GL0050176;O2.UC35-0_GL0045692;O2.UC32-1_GL0017134;MH0246_GL0081913;MH0422_GL0079279;MH0239_GL0065227;MH0200_GL0186699;MH0345_GL0113990;MH0006_GL0132212;T2D-176A_GL0013677;N024A_GL0014724;O2.UC41-1_GL0169024;N083A_GL0020962;V1.UC55-0_GL0138691;V1.UC12-4_GL0014481;V1.FI34_GL0046441;O2.UC7-1_GL014594…	Bacterial Non-GH Protein	0	1	0	1	6	6	0	0	0	1	0	1	6	0	6	0	0	0	0	0	2	2	0	0	0	0	0	0	112950000	150690000	0	0
sp|P01780|HV307_HUMAN;P01780;sp|P01763|HV348_HUMAN;sp|P01762|HV311_HUMAN;sp|A0A0B4J1V1|HV321_HUMAN;A0A0B4J1V1;P01763;P01762	Other Human Protein	3	4	4	4	4	4	3	3	3	4	4	4	4	3	4	3	2	2	2	2	2	2	1	2	94163000	138460000	764640000	619140000	249980000	232210000	141520000	219820000
MH0087_GL0014198;MH0032_GL0035111;T2D-97A_GL0015462	Bacterial Non-GH Protein	9	8	15	16	14	15	13	13	2	1	3	3	3	3	3	3	0	0	0	0	0	0	0	0	0	0	22840000	22292000	135370000	131630000	60081000	55976000
MH0087_GL0014646	Other Bacterial GH Protein	0	0	0	5	0	10	0	9	0	0	0	5	0	0	10	9	0	0	0	5	0	10	0	9	0	0	0	15932000	0	227300000	0	120890000
MH0087_GL0015274	Bacterial Non-GH Protein	4	3	12	13	9	10	7	9	0	0	0	0	0	0	0	1	0	0	0	0	0	0	0	1	0	0	0	0	0	0	0	5913300
MH0087_GL0029662;MH0389_GL0079357;MH0006_GL0047392;V1.UC11-5_GL0098694;N037A_GL0072193;MH0239_GL0052995;MH0012_GL0198836;MH0003_GL0009350;MH0345_GL0086274;DOM012_GL0021177	Bacterial Non-GH Protein	2	2	3	3	1	1	5	5	0	0	0	1	0	1	0	1	0	0	0	1	0	0	1	1	0	0	0	0	0	0	0	6521200
MH0239_GL0015296;MH0150_GL0058162	Glucosidase	0	16	0	7	0	19	0	15	0	15	0	6	0	0	18	14	0	15	0	6	0	18	0	14	0	137860000	0	20668000	0	376920000	0	87706000		Type 1
V1.CD3-0-PN_GL0093754;V1.CD12-3_GL0117722	Bacterial Non-GH Protein	9	11	1	1	0	0	1	1	9	11	1	1	0	1	0	1	9	11	1	1	0	0	1	1	110790000	136380000	0	0	0	0	0	0
sp|P01877|IGHA2_HUMAN;P01877	Other Human Protein	8	7	9	10	9	8	7	6	2	2	2	3	2	2	2	2	2	2	2	3	2	2	2	2	189490000	135610000	541290000	514020000	281570000	380240000	82684000	63644000
MH0002_GL0032236	Glucuronidase	0	0	0	0	0	0	0	4	0	0	0	0	0	0	0	4	0	0	0	0	0	0	0	4	0	0	0	0	0	0	0	91019000	Loop 2
MH0088_GL0020015;MH0188_GL0025789	Bacterial Non-GH Protein	1	0	1	2	6	6	1	1	0	0	0	1	5	0	5	0	0	0	0	0	2	2	0	0	0	0	0	0	189050000	175410000	0	0
MH0088_GL0054186;MH0287_GL0008524;V1.CD46-0_GL0057744;MH0389_GL0110070;MH0370_GL0113432;MH0370_GL0024951;V1.FI36_GL0082644;V1.CD4-0-PT_GL0001911;O2.CD2-0-PT_GL0016459	Bacterial Non-GH Protein	0	1	0	1	4	4	1	1	0	1	0	1	1	1	1	1	0	1	0	1	1	1	1	1	0	0	0	0	0	0	0	1795100
MH0088_GL0109165;T2D-49A_GL0045761;MH0188_GL0121537;V1.UC26-4_GL0097939;V1.UC11-5_GL0110818;V1.CD21-0_GL0047952;T2D-62A_GL0037871;O2.UC41-1_GL0035440;MH0198_GL0145862;MH0188_GL0170778;V1.CD40-0_GL0099196;O2.CD1-0-PT_GL0054229	Bacterial Non-GH Protein	0	1	0	0	7	8	0	1	0	1	0	0	7	0	8	1	0	1	0	0	7	8	0	1	0	0	0	0	103380000	123140000	0	0
MH0088_GL0117539;MH0108_GL0090586;O2.UC41-1_GL0189935;MH0110_GL0025170	Bacterial Non-GH Protein	6	6	5	5	4	5	6	5	1	1	1	1	0	1	1	1	0	0	0	0	0	0	0	0	0	0	0	0	0	0	0	10641000
MH0068_GL0053216	Glucuronidase	0	4	0	5	0	3	0	5	0	2	0	2	0	0	1	3	0	1	0	2	0	1	0	2	0	132190000	0	90618000	0	0	0	67422000	Mini-Loop 1
T2D-135A_GL0050004;NOF013_GL0018595;MH0090_GL0066693;MH0055_GL0021291	Bacterial Non-GH Protein	1	0	1	2	1	0	3	3	1	0	1	2	1	3	0	3	1	0	1	2	1	0	3	3	0	0	0	5374200	0	0	12478000	18724000
MH0092_GL0059771	Unknown	0	0	0	0	0	0	1	2	0	0	0	0	0	1	0	2	0	0	0	0	0	0	1	2	0	0	0	0	0	0	0	12463000
V1.FI25_GL0042905;O2.UC31-0_GL0078909;O2.UC11-2_GL0007061	Bacterial Non-GH Protein	8	8	6	8	9	9	7	10	8	8	6	8	9	7	9	10	1	1	0	1	1	1	1	1	153520000	129890000	75656000	110800000	171340000	228980000	45729000	106910000
MH0092_GL0099085;MH0419_GL0106259;MH0382_GL0043659;O2.UC7-1_GL0171807;O2.UC48-0_GL0316528;NLM008_GL0010197;V1.UC50-1_GL0023593;O2.UC35-2_GL0066288;MH0377_GL0059157;MH0205_GL0152579;MH0396_GL0086283;V1.CD54-0_GL0090916;V1.UC38-0_GL0023139;O2.UC20-1_GL0062677;MH0247_GL0117870;MH0406_GL0194559;V1.FI20_GL0151698;MH0321_GL0126866;V1.FI04_GL0024672;V1.CD24-0_GL0159554;O2.UC50-2_GL0181113;V1.UC35-4_GL01…	Bacterial Non-GH Protein	7	7	7	7	7	7	7	7	1	1	1	1	1	1	1	1	0	0	0	0	0	0	0	0	0	0	0	0	0	0	0	46657000
MH0092_GL0132892;MH0351_GL0094949	Bacterial Non-GH Protein	0	1	1	1	5	5	1	2	0	1	1	1	5	1	5	2	0	1	1	1	5	5	1	2	0	0	0	0	82407000	403260000	0	25514000
MH0004_GL0010941	Other Bacterial GH Protein	0	5	0	4	0	5	0	5	0	1	0	1	0	0	2	2	0	1	0	1	0	2	0	2	0	129830000	0	31594000	0	599590000	0	16531000
MH0093_GL0019992;MH0265_GL0079486;NOF013_GL0038218;MH0314_GL0116822;MH0281_GL0120435;MH0047_GL0001144;MH0337_GL0006608;MH0407_GL0010779;MH0386_GL0053213;MH0321_GL0061663;MH0126_GL0130124;MH0069_GL0027381;MH0057_GL0015473;V1.CD40-0_GL0147731;V1.CD27-0_GL0122789;MH0192_GL0106733;MH0006_GL0030952	Bacterial Non-GH Protein	2	3	3	4	1	4	5	3	0	1	0	1	0	2	1	1	0	0	0	0	0	0	0	0	0	0	0	0	0	0	26309000	0
MH0098_GL0129777	Other Bacterial GH Protein	1	4	5	10	3	12	4	9	1	1	1	1	1	1	1	1	1	1	1	1	1	1	1	1	0	0	0	0	0	0	0	238570000
MH0099_GL0111635;SZEY-58A_GL0083072	Bacterial Non-GH Protein	0	0	11	9	0	0	11	11	0	0	11	9	0	11	0	11	0	0	11	9	0	0	11	11	0	0	147290000	111620000	0	0	219550000	201700000
MH0111_GL0104630;MH0100_GL0029530;MH0259_GL0035171;MH0441_GL0008801;T2D-33A_GL0070079;NLF002_GL0036803;MH0205_GL0087188	Bacterial Non-GH Protein	1	1	4	4	1	2	1	1	1	1	4	4	1	1	2	1	1	1	4	4	1	2	1	1	0	0	22031000	26756000	0	0	0	0
O2.UC15-2_GL0136796	Bacterial Non-GH Protein	8	8	7	8	3	3	8	9	6	6	6	6	2	6	2	7	2	2	2	2	0	0	2	2	118700000	128420000	123550000	159300000	10067000	7607700	200760000	340400000
MH0002_GL0029049	Other Bacterial GH Protein	0	8	0	5	0	4	0	11	0	8	0	5	0	0	4	11	0	2	0	2	0	1	0	4	0	127120000	0	20960000	0	23227000	0	145530000
MH0100_GL0158531;MH0191_GL0015452	Bacterial Non-GH Protein	1	1	2	2	1	0	0	0	1	1	2	2	1	0	0	0	1	1	2	2	1	0	0	0	0	0	12168000	14720000	0	0	0	0
MH0101_GL0046924;T2D-91A_GL0075280	Bacterial Non-GH Protein	3	3	5	6	4	4	7	5	0	0	0	0	0	1	0	1	0	0	0	0	0	0	0	0	0	0	0	0	0	0	0	2567900
MH0101_GL0104651	Bacterial Non-GH Protein	6	5	12	11	12	13	11	11	0	0	1	0	1	1	1	1	0	0	1	0	1	1	1	1	0	0	0	0	0	0	0	27652000
MH0141_GL0037895;NOF013_GL0040019;MH0415_GL0113105;MH0238_GL0048184	Bacterial Non-GH Protein	6	7	3	6	0	1	5	5	6	7	3	6	0	5	1	5	0	0	0	0	0	0	0	0	90279000	126360000	39174000	56562000	0	0	41476000	101570000
MH0108_GL0064452	Bacterial Non-GH Protein	4	6	10	10	8	10	8	9	0	1	1	0	0	1	1	1	0	0	0	0	0	0	0	0	0	0	0	0	0	0	0	21597000
MH0108_GL0077755	Unknown	0	0	1	1	0	0	0	0	0	0	1	1	0	0	0	0	0	0	1	1	0	0	0	0	0	0	0	3958500	0	0	0	0
MH0109_GL0026096	Glucosidase	0	12	0	14	0	2	0	17	0	1	0	1	0	0	0	3	0	0	0	0	0	0	0	1	0	0	0	0	0	0	0	41551000		Type 2
NLF005_GL0019320	Other Bacterial GH Protein	0	6	0	6	0	0	0	1	0	1	0	2	0	0	0	0	0	1	0	2	0	0	0	0	0	125210000	0	85795000	0	0	0	0
V1.UC54-0_GL0075740	Bacterial Non-GH Protein	6	5	5	4	4	6	4	4	6	5	5	4	4	4	6	4	1	1	1	0	0	1	0	0	147420000	124690000	49653000	63147000	117680000	120430000	69608000	95950000
MH0087_GL0041507	Unknown	0	4	0	34	0	3	0	1	0	4	0	34	0	0	3	1	0	4	0	33	0	3	0	0	0	122320000	0	783930000	0	13375000	0	0
MH0110_GL0036341	Bacterial Non-GH Protein	6	7	15	16	11	12	13	11	0	2	4	4	2	3	2	2	0	0	0	0	0	0	0	0	0	0	43117000	27849000	0	37385000	15347000	20428000
MH0111_GL0044849	Bacterial Non-GH Protein	0	0	1	3	0	0	0	0	0	0	0	1	0	0	0	0	0	0	0	1	0	0	0	0	0	0	0	2180400	0	0	0	0
MH0373_GL0134817;MH0111_GL0058619;MH0391_GL0097988	Bacterial Non-GH Protein	1	1	1	1	1	1	1	1	1	1	1	1	1	1	1	1	1	1	1	1	1	1	1	1	0	0	0	0	0	0	0	12468000
MH0117_GL0079310	Bacterial Non-GH Protein	6	6	5	5	4	3	5	5	1	1	0	0	0	0	0	1	0	0	0	0	0	0	0	0	0	0	0	0	0	0	0	2509300
O2.UC15-0_GL0049743;MH0118_GL0121712;V1.CD32-0_GL0132510;V1.UC30-0_GL0035330;O2.UC47-2_GL0088733;MH0377_GL0085747;V1.CD20-4_GL0082521;MH0251_GL0189979;V1.CD54-0_GL0084799;O2.UC7-1_GL0138865;O2.CD1-0-PT_GL0030617;MH0127_GL0074428;MH0280_GL0156307	Bacterial Non-GH Protein	5	6	6	8	7	7	8	8	0	1	1	2	2	2	2	2	0	0	0	0	0	0	0	0	0	0	0	19011000	12875000	17811000	15350000	23677000
MH0120_GL0020767;MH0402_GL0025819;N085A_GL0055574;T2D-48A_GL0099144;MH0333_GL0065276;MH0101_GL0077971;MH0038_GL0008735;MH0011_GL0060311;MH0011_GL0096126;MH0004_GL0027134;MH0025_GL0025390;MH0004_GL0034979;DOM005_GL0018118;MH0381_GL0172020;T2D-73A_GL0042172;MH0152_GL0037296;763034.HMPREF9446_03708;V1.UC57-0_GL0011033;MH0415_GL0097382;MH0378_GL0118800;V1.UC39-4_GL0055139;T2D-135A_GL0059587;O2.UC54-2…	Bacterial Non-GH Protein	2	2	4	6	1	2	5	5	0	0	1	1	0	0	0	0	0	0	0	0	0	0	0	0	0	0	0	2048000	0	0	0	0
MH0122_GL0000899;MH0193_GL0053065;O2.UC15-1_GL0030467;MH0111_GL0063201;MH0439_GL0228879;T2D-133A_GL0033880;MH0129_GL0011109;T2D-14A_GL0060556;MH0385_GL0107991;O2.UC9-1_GL0129519;V1.FI14_GL0134625;MH0364_GL0016194	Bacterial Non-GH Protein	8	8	8	8	7	8	5	6	1	1	1	1	1	0	1	0	0	0	0	0	0	0	0	0	0	0	0	0	0	16580000	0	0
MH0122_GL0010557;V1.CD49-0_GL0135347;MH0012_GL0192501;V1.UC47-4_GL0177029	Bacterial Non-GH Protein	4	3	5	5	3	4	2	3	1	1	1	1	1	1	1	1	1	1	1	1	1	1	1	1	0	0	0	0	0	0	0	769010
O2.UC26-0_GL0078265	Glucuronidase	0	1	0	6	0	5	0	8	0	0	0	5	0	0	4	7	0	0	0	5	0	4	0	7	0	0	0	25434000	0	69019000	0	352380000	No loop
MH0086_GL0000688;V1.CD15-3_GL0029262;O2.UC59-0_GL0107330;MH0105_GL0012983;MH0204_GL0212839;MH0140_GL0085747;MH0251_GL0120285;SZEY-69A_GL0061964;MH0292_GL0136678;MH0275_GL0122495;BGI-28A_GL0067985;MH0151_GL0015387;N051A_GL0051558;MH0088_GL0082995	Bacterial Non-GH Protein	6	6	4	4	6	6	2	4	3	3	0	0	3	1	3	1	0	0	0	0	0	0	0	0	149610000	119060000	0	0	124490000	66486000	0	0
MH0123_GL0013953	Other Bacterial GH Protein	0	7	0	7	0	7	0	0	0	1	0	1	0	0	1	0	0	1	0	1	0	1	0	0	0	0	0	0	0	16911000	0	0
sp|P62987|RL40_HUMAN;sp|P62979|RS27A_HUMAN;sp|P0CG47|UBB_HUMAN;sp|P0CG48|UBC_HUMAN;P62987;P62979;P0CG47;P0CG48	Other Human Protein	3	3	3	3	3	3	1	3	3	3	3	3	3	1	3	3	3	3	3	3	3	3	1	3	169580000	117250000	184270000	100820000	34135000	45897000	14716000	12877000
MH0124_GL0080609	Bacterial Non-GH Protein	3	2	1	1	1	0	2	2	1	0	0	0	0	1	0	1	1	0	0	0	0	0	1	1	0	0	0	0	0	0	0	4330200
MH0124_GL0120108	Bacterial Non-GH Protein	4	4	6	6	3	4	4	4	0	0	1	1	0	1	0	1	0	0	0	0	0	0	0	0	0	0	0	0	0	0	0	83095000
MH0124_GL0137595;V1.FI24_GL0146983;O2.UC8-1_GL0081086;V1.FI05_GL0034139;V1.CD54-0_GL0127443;V1.FI17_GL0205340	Other Bacterial GH Protein	1	0	0	10	0	10	0	0	1	0	0	10	0	0	10	0	1	0	0	6	0	6	0	0	0	0	0	52551000	0	45784000	0	0
MH0124_GL0142788	Glucosidase	0	1	0	3	0	0	0	1	0	0	0	1	0	0	0	0	0	0	0	1	0	0	0	0	0	0	0	1502200	0	0	0	0		Type 2
MH0127_GL0005012;MH0188_GL0080961;O2.UC35-0_GL0121612;MH0385_GL0090528;T2D-33A_GL0125895	Glucosidase	0	0	0	3	0	0	0	0	0	0	0	3	0	0	0	0	0	0	0	3	0	0	0	0	0	0	0	28783000	0	0	0	0		Type 1
sp|A8K7I4|CLCA1_HUMAN;A8K7I4	Other Human Protein	13	9	16	19	18	19	12	13	13	9	16	19	18	12	19	13	12	8	16	19	17	18	12	13	147210000	116820000	446070000	529120000	842480000	1026500000	253320000	329540000
MH0127_GL0094117;N056A_GL0035081	Bacterial Non-GH Protein	1	1	0	0	2	1	3	3	1	1	0	0	2	3	1	3	1	1	0	0	2	1	3	3	0	0	0	0	0	0	14072000	10162000
MH0358_GL0103072;O2.UC38-2_GL0033843;V1.UC3-0_GL0080907;V1.UC53-0_GL0077079;V1.FI36_GL0200843;ED15A_GL0070736;O2.UC14-1_GL0124158;MH0370_GL0081081;V1.UC58-0_GL0129974;MH0212_GL0082950;O2.UC11-1_GL0017690;O2.CD3-0-PT_GL0012177;O2.UC57-0_GL0105204;MH0437_GL0085015;DOF002_GL0009451;MH0445_GL0022135;NLM023_GL0021489;MH0203_GL0120569;MH0336_GL0082251;MH0212_GL0165724;O2.UC32-2_GL0074602;V1.UC52-1_GL01…	Bacterial Non-GH Protein	10	11	4	8	10	10	8	11	9	10	3	7	9	7	9	10	1	1	0	0	1	1	0	1	146770000	116790000	68168000	93918000	107180000	121030000	87000000	143450000
MH0131_GL0059553;O2.CD3-0-PT_GL0038521;V1.CD21-0_GL0022432;V1.FI34_GL0116278;O2.CD1-0-PT_GL0048513;MH0274_GL0152395;V1.CD54-0_GL0025588;V1.FI22_GL0110514;N042A_GL0087040	Bacterial Non-GH Protein	7	4	2	3	0	0	1	2	1	0	0	0	0	0	0	0	1	0	0	0	0	0	0	0	0	0	0	0	0	0	0	0
MH0131_GL0060113	Unknown	0	1	0	4	0	2	0	0	0	0	0	1	0	0	1	0	0	0	0	1	0	1	0	0	0	0	0	0	0	21942000	0	0
MH0131_GL0070873;MH0198_GL0184984;MH0200_GL0091639;O2.CD1-0-PT_GL0076021;T2D-65A_GL0023247;O2.UC35-0_GL0091831;MH0188_GL0036403;V1.CD55-0_GL0019245	Bacterial Non-GH Protein	4	4	4	4	3	5	4	4	0	0	0	1	0	0	1	0	0	0	0	1	0	1	0	0	0	0	0	0	0	101050000	0	0
MH0131_GL0132614	Bacterial Non-GH Protein	13	10	14	16	10	10	15	15	1	1	2	2	2	2	2	2	0	0	1	1	1	1	1	1	0	0	30732000	30274000	12954000	37339000	29137000	70870000
MH0131_GL0167816	Bacterial Non-GH Protein	6	6	6	5	5	5	6	6	1	1	1	0	0	1	0	1	0	0	0	0	0	0	0	0	0	0	0	0	0	0	0	5500600
MH0386_GL0191516;MH0132_GL0081471;MH0314_GL0128340;V1.UC41-0_GL0019707;O2.UC24-1_GL0054601;MH0192_GL0148246;MH0150_GL0100222;MH0239_GL0133280;MH0020_GL0003174	Bacterial Non-GH Protein	9	9	10	11	8	7	9	8	1	0	1	1	0	1	0	1	0	0	0	0	0	0	0	0	0	0	0	0	0	0	0	8183900
sp|Q86UP6|CUZD1_HUMAN;Q86UP6	Other Human Protein	4	5	4	6	5	6	5	4	4	5	4	6	5	5	6	4	4	5	4	6	5	6	5	4	91483000	115290000	329570000	219910000	627260000	631760000	90188000	79351000
sp|O60844|ZG16_HUMAN;O60844	Other Human Protein	4	4	4	4	3	4	4	4	4	4	4	4	3	4	4	4	4	4	4	4	3	4	4	4	260250000	111980000	565320000	379770000	38832000	41468000	86538000	83591000
MH0133_GL0064565	Bacterial Non-GH Protein	3	4	1	1	0	1	1	3	0	1	0	0	0	0	0	1	0	1	0	0	0	0	0	1	0	0	0	0	0	0	0	152720000
MH0133_GL0080622	Bacterial Non-GH Protein	0	0	4	5	0	1	0	0	0	0	1	1	0	0	0	0	0	0	1	1	0	0	0	0	0	0	0	41712000	0	0	0	0
MH0139_GL0041455	Bacterial Non-GH Protein	4	3	3	4	3	3	1	1	1	1	0	1	0	0	0	0	1	1	0	1	0	0	0	0	0	0	0	2800600	0	0	0	0
MH0140_GL0119224	Bacterial Non-GH Protein	5	6	5	7	1	1	6	7	2	2	3	3	1	3	0	3	0	0	0	0	0	0	0	0	0	0	29899000	54797000	0	0	27477000	98665000
MH0141_GL0027748;MH0066_GL0058173;V1.UC37-0_GL0016055;V1.FI14_GL0139180;O2.UC7-1_GL0007535;MH0135_GL0090189;MH0069_GL0052207;MH0002_GL0060311;MH0448_GL0008361	Bacterial Non-GH Protein	7	7	6	6	7	7	7	8	1	1	0	0	1	1	1	1	1	1	0	0	1	1	1	1	0	0	0	0	0	0	0	11430000
MH0239_GL0022416	Other Bacterial GH Protein	0	7	0	1	0	10	0	2	0	7	0	1	0	0	10	2	0	1	0	0	0	4	0	0	0	110740000	0	0	0	367220000	0	35170000
BGI001A_GL0017652;MH0006_GL0073829;MH0198_GL0058086;MH0277_GL0039423	Bacterial Non-GH Protein	13	16	20	21	16	16	20	18	7	10	14	14	9	13	10	12	0	0	0	0	0	0	0	0	166900000	109970000	375060000	380740000	167590000	245910000	432470000	426080000
MH0143_GL0090731	Bacterial Non-GH Protein	1	2	2	3	1	2	1	2	0	1	1	1	1	1	1	1	0	1	1	1	1	1	1	1	0	0	0	0	0	0	0	520330000
MH0333_GL0069706;MH0329_GL0052086;MH0447_GL0175575;O2.UC41-1_GL0001297;V1.CD29-0_GL0172680;MH0127_GL0096114;T2D-25A_GL0079582	Bacterial Non-GH Protein	7	7	1	4	4	5	3	3	7	7	1	4	4	3	5	3	5	5	1	3	4	4	3	3	126900000	109950000	0	28300000	48874000	63259000	36916000	69737000
MH0431_GL0199597;MH0149_GL0023818;MH0199_GL0048903;MH0128_GL0036211;O2.UC37-1_GL0100645;DLM014_GL0004997;MH0212_GL0026342;MH0234_GL0014147;MH0060_GL0056069;MH0203_GL0125000;O2.UC35-1_GL0002454;O2.UC5-1_GL0094660;DLM020_GL0025226;MH0267_GL0140264;O2.UC46-1_GL0133740;NOM025_GL0011089;MH0187_GL0073288;MH0136_GL0001468;MH0358_GL0064884;O2.UC22-0_GL0043052;NLM026_GL0015543;MH0257_GL0081994;MH0417_GL02…	Bacterial Non-GH Protein	1	0	6	6	0	0	4	5	0	0	1	1	0	0	0	0	0	0	1	1	0	0	0	0	0	0	0	10698000	0	0	0	0
MH0149_GL0131509;MH0187_GL0109875;T2D-22A_GL0087067;V1.CD3-3-PN_GL0071990;T2D-51A_GL0108212;N085A_GL0056784;MH0415_GL0177548;MH0274_GL0064412;T2D-12A_GL0019271;V1.UC15-0_GL0018799;NLF001_GL0009725;MH0309_GL0059112	Bacterial Non-GH Protein	4	4	4	4	4	4	5	5	0	0	0	0	0	0	0	1	0	0	0	0	0	0	0	0	0	0	0	0	0	0	0	5798300
MH0151_GL0081704;V1.FI15_GL0077788;O2.UC53-0_GL0179246;MH0204_GL0170218;V1.FI36_GL0092640;N037A_GL0130228;N026A_GL0000635;MH0403_GL0128061;MH0338_GL0038562;O2.UC22-0_GL0027160;MH0346_GL0065980;SZEY-29A_GL0039899;V1.FI07_GL0119291;V1.UC19-0_GL0057756;V1.FI03_GL0123069;O2.UC40-0_GL0100919;T2D-22A_GL0036676;MH0266_GL0037277;O2.UC40-1_GL0202013;V1.CD36-0_GL0137798;SZEY-48A_GL0082592;V1.CD46-0_GL00941…	Bacterial Non-GH Protein	3	3	0	2	0	1	0	0	1	1	0	1	0	0	0	0	1	1	0	1	0	0	0	0	0	0	0	4378700	0	0	0	0
V1.UC16-0_GL0085088;V1.UC53-0_GL0050095;V1.FI36_GL0038194;O2.UC15-1_GL0073125;O2.UC35-2_GL0023079;DOF008_GL0065677;O2.UC46-0_GL0108472	Bacterial Non-GH Protein	8	6	3	4	1	1	1	3	8	6	3	4	1	1	1	3	2	2	1	1	1	1	0	1	103210000	109180000	20135000	9742900	0	0	0	6827000
T2D-63A_GL0102980;V1.CD12-0_GL0049035	Other Bacterial GH Protein	0	9	0	0	0	1	0	6	0	8	0	0	0	0	0	5	0	8	0	0	0	0	0	5	0	105520000	0	0	0	0	0	90306000
T2D-198A_GL0045872;T2D-135A_GL0082415	Bacterial Non-GH Protein	9	10	0	0	0	0	0	0	9	10	0	0	0	0	0	0	9	10	0	0	0	0	0	0	147150000	103410000	0	0	0	0	0	0
MH0160_GL0067822;MH0109_GL0004093;MH0389_GL0097555;MH0165_GL0029237	Bacterial Non-GH Protein	1	2	7	9	4	4	0	1	1	2	7	9	4	0	4	1	1	2	6	7	4	4	0	1	0	0	197360000	257680000	29493000	23692000	0	0
O2.UC26-2_GL0041910	Glucuronidase	0	1	0	6	0	9	0	11	0	1	0	6	0	0	9	11	0	1	0	6	0	9	0	11	0	0	0	11659000	0	20146000	0	398810000	No loop
O2.UC8-2_GL0159749;MH0161_GL0039359;O2.UC27-1_GL0116032;V1.UC35-0_GL0109254;V1.FI06_GL0077061;SZEY-75A_GL0064747	Bacterial Non-GH Protein	5	6	6	5	6	6	4	7	1	1	1	1	1	1	1	1	1	1	1	1	1	1	1	1	0	0	0	0	0	0	0	1598600
MH0026_GL0054707;MH0267_GL0147916;MH0267_GL0106947;NOM023_GL0008712;N085A_GL0074368;N085A_GL0012768;MH0198_GL0105460;NOM010_GL0029456;V1.UC26-4_GL0085281;T2D-134A_GL0012529;V1.FI08_GL0110740;DOM014_GL0018444;V1.CD15-3_GL0000804;MH0415_GL0234091;MH0407_GL0015949;MH0097_GL0020346;MH0187_GL0089989;V1.UC40-0_GL0108999;MH0250_GL0017484;MH0281_GL0054039;MH0399_GL0079261;MH0430_GL0141593;MH0185_GL011999…	Bacterial Non-GH Protein	7	6	2	2	0	3	2	4	7	6	2	2	0	2	3	4	1	0	0	0	0	0	0	0	109970000	98487000	12989000	15559000	0	12042000	17623000	27393000
sp|P63261|ACTG_HUMAN;sp|P60709|ACTB_HUMAN;P63261;P60709;sp|Q6S8J3|POTEE_HUMAN;sp|A5A3E0|POTEF_HUMAN;Q6S8J3;A5A3E0;MH0288_GL0037579;MH0303_GL0087564;MH0272_GL0076022;sp|P0CG38|POTEI_HUMAN;P0CG38;MH0206_GL0170005;sp|Q9BYX7|ACTBM_HUMAN;sp|P0CG39|POTEJ_HUMAN;Q9BYX7;P0CG39	Other Human Protein	9	5	4	5	2	2	5	4	9	5	4	5	2	5	2	4	4	0	1	1	0	1	1	2	217740000	98271000	17861000	23744000	23035000	26648000	50338000	57950000
V1.UC52-0_GL0030887;MH0163_GL0113363	Bacterial Non-GH Protein	4	5	5	6	1	3	2	2	0	0	0	1	0	0	0	0	0	0	0	0	0	0	0	0	0	0	0	15991000	0	0	0	0
MH0164_GL0059831;MH0366_GL0052181;MH0012_GL0184688;MH0036_GL0054775	Bacterial Non-GH Protein	3	3	4	4	3	2	5	4	2	2	2	2	1	2	1	2	2	2	2	2	1	1	2	2	0	0	0	0	0	0	0	66281000
MH0415_GL0231923;MH0238_GL0113089;MH0165_GL0023895;MH0260_GL0020845;O2.UC55-0_GL0169262	Bacterial Non-GH Protein	0	0	2	2	1	1	2	2	0	0	2	2	1	2	1	2	0	0	2	2	1	1	2	2	0	0	21404000	0	0	0	27149000	24343000
sp|P05109|S10A8_HUMAN;P05109	Other Human Protein	3	3	4	2	0	1	4	4	3	3	4	2	0	4	1	4	3	3	4	2	0	1	4	4	131490000	93632000	89919000	46171000	0	0	41585000	25205000
MH0169_GL0120971	Bacterial Non-GH Protein	0	0	0	0	2	2	0	0	0	0	0	0	1	0	1	0	0	0	0	0	1	1	0	0	0	0	0	0	0	7063300	0	0
MH0172_GL0087900;V1.UC22-1_GL0026758;MH0391_GL0089053;MH0139_GL0093920;O2.UC40-2_GL0129057;MH0178_GL0071336;O2.UC6-0_GL0075672;NOM017_GL0002488;MH0185_GL0005861;MH0113_GL0080189;BGI003A_GL0101587;O2.UC2-0_GL0080771;MH0089_GL0102094	Unknown	4	4	2	1	3	3	5	4	1	1	1	0	0	3	0	2	0	0	1	0	0	0	1	0	0	0	0	0	0	0	39857000	37658000
MH0173_GL0071859	Bacterial Non-GH Protein	3	3	3	3	1	2	1	1	1	1	1	1	0	0	0	0	1	1	1	1	0	0	0	0	0	0	0	1898100	0	0	0	0
MH0174_GL0036486	Bacterial Non-GH Protein	0	0	0	0	0	0	0	1	0	0	0	0	0	0	0	1	0	0	0	0	0	0	0	1	0	0	0	0	0	0	0	0
MH0412_GL0074464;MH0176_GL0028889;O2.UC9-1_GL0170013;N062A_GL0045709	Glucosidase	0	2	0	4	0	1	0	2	0	0	0	2	0	0	0	0	0	0	0	2	0	0	0	0	0	0	0	31894000	0	0	0	0		Type 1
MH0069_GL0014002;V1.CD32-0_GL0088268;V1.CD21-0_GL0064854;MH0451_GL0092316;MH0432_GL0016743;MH0101_GL0101194;MH0308_GL0054991;SZEY-10A_GL0026931;O2.UC11-1_GL0165481;NLM027_GL0004204;V1.CD3-0-PT_GL0026234;T2D-8A_GL0046192;V1.FI17_GL0209838	Glucuronidase	0	3	4	22	2	14	2	19	0	0	0	13	0	1	4	10	0	0	0	9	0	3	1	7	0	0	0	3164100000	0	8253700	0	378030000	Loop 1
MH0415_GL0148933;MH0181_GL0054369;MH0224_GL0075355	Bacterial Non-GH Protein	1	2	4	4	2	0	4	4	0	1	1	1	0	1	0	1	0	1	1	1	0	0	1	1	0	0	0	0	0	0	0	12980000
MH0183_GL0168009;V1.CD8-0-PN_GL0173066;MH0212_GL0170127;O2.UC40-1_GL0008535;MH0220_GL0042896;MH0329_GL0138884;MH0212_GL0002764;DOM019_GL0085639;MH0092_GL0146323;MH0169_GL0133291;MH0024_GL0009078;MH0212_GL0137481;MH0369_GL0062307;MH0183_GL0149718;MH0247_GL0104102;MH0361_GL0032135;T2D-178A_GL0033646;MH0426_GL0110522;MH0169_GL0081617;MH0365_GL0149534;MH0191_GL0148596;MH0131_GL0159395;MH0049_GL004127…	Unknown	3	3	1	2	1	1	4	4	1	1	0	1	0	1	0	1	1	1	0	1	0	0	1	1	0	0	0	0	0	0	0	14492000
MH0187_GL0043654;NOF008_GL0038806;T2D-33A_GL0137246;MH0149_GL0030810	Bacterial Non-GH Protein	7	8	11	12	6	6	6	6	0	0	3	4	0	0	0	0	0	0	0	0	0	0	0	0	0	0	15007000	16020000	0	0	0	0
MH0188_GL0028315;T2D-49A_GL0047444;V1.CD20-4_GL0041078;T2D-51A_GL0071478	Bacterial Non-GH Protein	6	5	5	5	5	6	5	5	1	1	1	1	1	1	1	1	1	1	1	1	1	1	1	1	0	0	0	0	0	0	0	25828000
MH0110_GL0025297;657314.CK5_25200;MH0193_GL0194003;O2.UC11-2_GL0061237;MH0370_GL0079231;MH0373_GL0126221;V1.UC50-1_GL0199446;V1.UC35-4_GL0163018;MH0095_GL0093086;SZEY-93A_GL0020736;V1.CD32-0_GL0065737;O2.UC31-0_GL0100336;V1.UC37-0_GL0102601;MH0184_GL0095140;MH0402_GL0117674;MH0389_GL0145762;MH0075_GL0019814;N020A_GL0011908	Bacterial Non-GH Protein	6	10	9	11	12	13	15	15	6	10	9	11	12	15	13	15	0	0	0	0	0	2	2	2	93977000	90577000	130530000	199990000	148090000	232320000	145050000	240980000
MH0355_GL0251179;V1.UC57-0_GL0042900;O2.UC8-1_GL0155534;O2.UC41-1_GL0147267;O2.CD1-0-PT_GL0025395;MH0188_GL0064273	Bacterial Non-GH Protein	1	2	3	3	2	3	3	3	0	1	1	1	1	1	1	1	0	1	1	1	1	1	1	1	0	0	0	0	0	0	0	30295000
MH0188_GL0177728;O2.CD3-0-PT_GL0095526;MH0188_GL0054782;MH0111_GL0095926;MH0144_GL0150259	Bacterial Non-GH Protein	8	8	8	8	7	8	6	8	1	1	1	1	1	1	1	1	0	0	0	0	0	0	0	0	0	0	0	0	0	0	0	7259600
O2.CD3-0-PT_GL0040964;MH0370_GL0100179;MH0336_GL0016100;MH0233_GL0066343;MH0188_GL0192716	Bacterial Non-GH Protein	2	2	2	2	1	2	1	1	1	1	1	1	1	1	1	1	1	1	1	1	1	1	1	1	0	0	0	0	0	0	0	19424000
MH0012_GL0150149;MH0288_GL0174273	Bacterial Non-GH Protein	6	8	8	8	0	0	0	0	6	8	8	8	0	0	0	0	6	8	8	8	0	0	0	0	122010000	90541000	175180000	274340000	0	0	0	0
MH0189_GL0097792	Bacterial Non-GH Protein	4	3	4	5	3	3	4	4	1	0	1	1	0	0	0	0	1	0	1	1	0	0	0	0	0	0	0	11439000	0	0	0	0
MH0191_GL0069603	Bacterial Non-GH Protein	5	5	5	7	1	1	5	5	0	0	1	1	0	0	0	0	0	0	1	1	0	0	0	0	0	0	0	4546500	0	0	0	0
MH0191_GL0141003;MH0386_GL0176763	Glucosidase	0	1	0	22	0	16	0	10	0	1	0	22	0	0	16	10	0	1	0	22	0	16	0	10	0	0	0	1568000000	0	158830000	0	99578000		Type 1
MH0192_GL0066636;V1.FI12_GL0204064;MH0068_GL0020068	Bacterial Non-GH Protein	12	11	15	16	12	10	16	15	1	0	2	2	2	2	2	2	0	0	0	0	0	0	0	0	0	0	10306000	10924000	10018000	12654000	14629000	13895000
O2.UC30-1_GL0127814	Bacterial Non-GH Protein	4	5	2	4	2	2	2	2	4	5	2	4	2	2	2	2	4	5	2	4	2	2	2	2	69211000	90362000	39308000	58157000	48206000	61934000	28047000	46219000
sp|P06870|KLK1_HUMAN;P06870	Other Human Protein	3	3	3	2	3	3	2	2	3	3	3	2	3	2	3	2	3	3	3	2	3	3	2	2	113600000	86636000	60160000	58009000	44698000	49010000	75400000	106010000
SZEY-48A_GL0000513	Bacterial Non-GH Protein	6	6	0	0	0	0	0	0	6	6	0	0	0	0	0	0	6	6	0	0	0	0	0	0	139480000	84403000	0	0	0	0	0	0
MH0375_GL0104353;T2D-22A_GL0117595;T2D-8A_GL0020779;O2.UC5-1_GL0078516;DOM019_GL0083606;MH0025_GL0021829;T2D-108A_GL0103258;T2D-70A_GL0177400	Bacterial Non-GH Protein	10	11	1	2	1	1	1	0	10	11	1	2	1	1	1	0	10	11	1	2	1	1	1	0	110000000	82605000	0	0	0	0	0	0
MH0198_GL0005234	Other Bacterial GH Protein	0	1	0	18	1	18	2	9	0	1	0	18	1	2	18	9	0	1	0	15	1	15	2	8	0	0	0	70709000	0	699330000	4040500	31817000
MH0198_GL0034285;O2.UC24-1_GL0015589	Glucosidase	1	12	0	8	0	10	0	13	0	1	0	0	0	0	0	1	0	0	0	0	0	0	0	0	0	0	0	0	0	0	0	96972000		Type 2
MH0198_GL0079953	Bacterial Non-GH Protein	5	4	2	4	5	6	4	5	1	1	0	0	1	0	1	0	1	1	0	0	1	1	0	0	0	0	0	0	0	8791900	0	0
MH0198_GL0135858;T2D-110A_GL0031782;MH0025_GL0035859;V1.UC41-0_GL0002322;NOF010_GL0024786;MH0101_GL0032236;MH0068_GL0000482;MH0012_GL0022599	Bacterial Non-GH Protein	2	2	2	1	0	0	2	2	1	1	1	0	0	1	0	1	1	1	1	0	0	0	1	1	0	0	0	0	0	0	0	29320000
NLM010_GL0023102;SZEY-55A_GL0043539;SZEY-37A_GL0088878;T2D-106A_GL0012158;N047A_GL0008976;O2.UC59-0_GL0087776;NOF005_GL0067543;T2D-22A_GL0076878;NOM027_GL0022571;MH0268_GL0166528;DLM017_GL0025199;T2D-2A_GL0026014;NLM032_GL0072671;O2.UC7-0_GL0057155;NLF013_GL0021505;MH0364_GL0079863;SZEY-62A_GL0058218;MH0310_GL0041551;SZEY-37A_GL0083117	Glucuronidase	0	0	0	9	0	0	0	6	0	0	0	9	0	0	0	6	0	0	0	4	0	0	0	2	0	0	0	124530000	0	0	0	71079000	Mini-Loop 1
sp|Q08380|LG3BP_HUMAN;Q08380	Other Human Protein	6	5	8	9	7	7	5	3	6	5	8	9	7	5	7	3	6	5	8	9	7	7	5	3	145530000	79693000	230010000	133770000	65940000	128780000	22360000	30018000
MH0200_GL0030129;V1.UC55-0_GL0064727;MH0363_GL0154863	Bacterial Non-GH Protein	1	1	1	1	1	1	1	1	1	1	1	1	1	1	1	1	1	1	1	1	1	1	1	1	0	0	168760000	117130000	0	0	0	0
V1.FI07_GL0023727	Glucuronidase	0	1	0	2	0	0	0	2	0	1	0	1	0	0	0	1	0	1	0	1	0	0	0	1	0	0	0	0	0	0	0	21713000	Mini-Loop 1
N064A_GL0010807;V1.FI03_GL0022881;MH0386_GL0058602;MH0203_GL0082613;MH0092_GL0114468;MH0366_GL0013691;MH0230_GL0166180;MH0092_GL0134858;MH0011_GL0009376	Bacterial Non-GH Protein	1	2	2	2	0	0	2	2	1	1	1	1	0	1	0	1	1	1	1	1	0	0	1	1	0	0	0	0	0	0	0	1803700
MH0203_GL0121300;SZEY-22A_GL0074012;DLM013_GL0015058;V1.CD21-0_GL0024876;MH0450_GL0193118;MH0413_GL0165598;MH0276_GL0176579;MH0173_GL0110639;MH0069_GL0016877;MH0456_GL0009212;O2.UC48-0_GL0304849;DLM013_GL0009519;MH0244_GL0024488;MH0441_GL0242111;MH0384_GL0017503;MH0270_GL0035733	Bacterial Non-GH Protein	6	6	4	4	5	5	6	5	1	1	0	0	1	1	1	1	0	0	0	0	0	0	0	0	0	0	0	0	0	0	0	9387100
V1.CD2-0-PN_GL0010816;MH0230_GL0055863;V1.CD21-4_GL0064390	Glucuronidase	0	2	0	8	0	1	0	1	0	0	0	6	0	0	0	0	0	0	0	6	0	0	0	0	0	0	0	52494000	0	0	0	0	No loop
V1.UC21-4_GL0080079;O2.UC21-1_GL0104914;O2.UC53-2_GL0003407;O2.CD3-0-PT_GL0085043;V1.UC34-0_GL0049943;T2D-143A_GL0044272;DLM012_GL0023376;O2.UC19-1_GL0086144	Glucosidase	1	19	0	26	0	28	0	27	1	15	0	22	0	0	24	23	0	6	0	10	0	11	0	11	0	78188000	0	265710000	0	1363700000	0	763950000		Type 1
MH0205_GL0085020	Other Bacterial GH Protein	1	6	0	7	0	0	0	1	1	0	0	1	0	0	0	0	1	0	0	1	0	0	0	0	0	0	0	6778900	0	0	0	0
MH0205_GL0143714	Other Bacterial GH Protein	0	6	0	7	0	2	0	1	0	1	0	2	0	0	0	0	0	1	0	2	0	0	0	0	0	0	0	91657000	0	0	0	0
MH0206_GL0026808	Glucosidase	0	2	0	2	0	1	1	2	0	1	0	1	0	1	0	1	0	1	0	1	0	0	1	1	0	0	0	0	0	0	0	284610000		Type 2
MH0211_GL0026922;V1.CD30-0_GL0013170;MH0370_GL0131089;MH0362_GL0098715;MH0391_GL0020329;DLF013_GL0066108;MH0422_GL0017052;O2.UC41-1_GL0072495;MH0377_GL0203777;MH0143_GL0039283;V1.UC21-4_GL0115255	Bacterial Non-GH Protein	0	1	0	0	3	3	0	1	0	1	0	0	3	0	3	1	0	1	0	0	2	2	0	1	0	0	0	0	76649000	100380000	0	0
T2D-155A_GL0006484;MH0212_GL0033917;T2D-11A_GL0126031;MH0108_GL0077280;MH0006_GL0144292;DLM018_GL0004913;MH0276_GL0239654;O2.UC19-2_GL0074728;MH0440_GL0184855;MH0229_GL0054097;MH0203_GL0144821;MH0433_GL0085108;V1.CD6-0-PT_GL0023854;MH0377_GL0198930;MH0437_GL0163370;MH0405_GL0045666;MH0318_GL0045314;MH0436_GL0099152;MH0054_GL0015247;MH0221_GL0006669;MH0447_GL0231222;MH0437_GL0152656	Bacterial Non-GH Protein	1	2	3	3	0	0	4	4	0	1	1	1	0	0	0	0	0	0	0	0	0	0	0	0	0	0	0	9284600	0	0	0	0
MH0212_GL0126379	Other Bacterial GH Protein	0	0	0	4	0	3	0	1	0	0	0	1	0	0	0	0	0	0	0	1	0	0	0	0	0	0	0	18671000	0	0	0	0
MH0195_GL0133235	Other Bacterial GH Protein	0	3	0	4	0	2	0	3	0	2	0	3	0	0	1	2	0	2	0	3	0	1	0	2	0	78100000	0	177400000	0	43388000	0	109740000
MH0220_GL0123771;MH0020_GL0011630	Bacterial Non-GH Protein	6	6	5	6	4	6	6	7	0	0	0	0	0	0	0	1	0	0	0	0	0	0	0	1	0	0	0	0	0	0	0	5020700
MH0178_GL0046238;T2D-11A_GL0100260;BGI001A_GL0045542	Glucuronidase	0	4	5	11	2	18	3	10	0	0	0	1	0	1	1	0	0	0	0	0	0	0	0	0	0	0	0	0	0	1221600000	0	0	Loop 1
MH0222_GL0067122	Unknown	2	3	4	6	2	3	4	3	0	0	1	1	0	1	1	1	0	0	0	0	0	0	0	0	0	0	0	0	0	0	0	13813000
T2D-135A_GL0104071;V1.CD29-0_GL0003887;NOF013_GL0004422;MH0113_GL0096266;MH0337_GL0081767;DLM014_GL0062733;MH0328_GL0039723;MH0407_GL0120974;MH0321_GL0137433;MH0265_GL0057122;MH0057_GL0036645;MH0046_GL0051149;MH0005_GL0007077;MH0004_GL0032632;V1.UC17-2_GL0012135;MH0055_GL0027837;V1.CD1-3-PN_GL0029286;V1.UC30-0_GL0118383;MH0181_GL0006114	Bacterial Non-GH Protein	6	4	5	5	4	4	5	5	6	4	5	5	4	5	4	5	1	1	1	1	1	1	1	1	78449000	78049000	161300000	197250000	38828000	33634000	146270000	235280000
MH0229_GL0060908	Glucosidase	0	0	0	4	0	0	0	1	0	0	0	1	0	0	0	0	0	0	0	1	0	0	0	0	0	0	0	1449600	0	0	0	0		Type 2
MH0229_GL0176757;V1.UC37-0_GL0104458;V1.CD6-0-PT_GL0118330	Bacterial Non-GH Protein	2	0	2	2	2	2	1	2	1	0	1	1	0	0	0	1	1	0	1	1	0	0	0	1	0	0	0	0	0	0	0	3928100
MH0230_GL0074273;V1.FI18_GL0106719	Bacterial Non-GH Protein	0	0	0	0	0	0	3	1	0	0	0	0	0	3	0	1	0	0	0	0	0	0	3	1	0	0	0	0	0	0	13086000	0
MH0230_GL0119172;V1.UC3-0_GL0020313	Bacterial Non-GH Protein	1	2	1	2	1	1	0	1	1	1	1	1	1	0	1	1	1	1	1	1	1	1	0	1	0	0	0	0	0	0	0	805910
MH0230_GL0158260	Bacterial Non-GH Protein	1	1	3	5	0	0	7	6	0	1	0	2	0	3	0	3	0	0	0	1	0	0	1	1	0	0	0	6929000	0	0	77656000	74637000
CON__P02769	Contaminant - Other	8	9	6	7	4	6	15	7	8	9	6	7	4	15	6	7	7	7	5	6	3	6	13	6	65433000	77691000	44855000	37516000	57744000	68499000	194790000	38069000
O2.UC38-1_GL0068098;MH0422_GL0195886;V1.CD54-0_GL0012086;V1.FI04_GL0143118;V1.UC13-3_GL0118425;MH0420_GL0106148;MH0193_GL0113013;V1.UC50-1_GL0074676;O2.UC52-0_GL0037532	Bacterial Non-GH Protein	10	8	6	8	10	9	8	11	9	8	6	8	10	8	9	10	2	1	0	1	2	2	2	2	102260000	76862000	75619000	46752000	131830000	118800000	147190000	194130000
N052A_GL0007108;T2D-48A_GL0109451;MH0121_GL0056374;MH0004_GL0009419;N085A_GL0071199	Bacterial Non-GH Protein	5	5	7	7	5	4	7	6	5	5	7	7	5	7	4	6	0	0	2	2	0	0	1	1	92507000	74527000	210120000	209100000	32811000	39640000	289910000	414790000
V1.CD46-0_GL0107006;MH0239_GL0045815	Bacterial Non-GH Protein	7	7	7	7	6	7	6	8	1	1	1	1	1	1	1	1	1	1	1	1	1	1	1	1	0	0	0	0	0	0	0	18974000
MH0239_GL0079213	Bacterial Non-GH Protein	6	6	6	6	6	6	6	6	1	1	1	1	1	1	1	1	0	0	0	0	0	0	0	0	0	0	0	0	0	0	0	45011000
MH0366_GL0124223;MH0243_GL0126875;MH0187_GL0118818;MH0143_GL0137663;MH0037_GL0022489;MH0011_GL0097741;MH0004_GL0034409;DOM022_GL0030407;DOM005_GL0020576;T2D-135A_GL0101840;V1.UC46-0_GL0064157;V1.CD38-0_GL0061081;NOF013_GL0079111;MH0188_GL0154033;DOF007_GL0046848;MH0198_GL0133282;N085A_GL0074956;V1.FI15_GL0140004;MH0057_GL0038083;MH0430_GL0125657;MH0314_GL0009236;MH0126_GL0059958;MH0069_GL0089897;…	Bacterial Non-GH Protein	7	6	3	6	0	1	6	5	7	6	3	6	0	6	1	5	7	6	3	6	0	1	6	5	58241000	74206000	18564000	39198000	0	0	46913000	81184000
MH0243_GL0032573	Bacterial Non-GH Protein	1	1	1	1	1	1	1	1	1	1	1	1	1	1	1	1	1	1	1	1	1	1	1	1	0	0	0	0	0	0	0	66090000
MH0293_GL0172477;MH0274_GL0044406;MH0244_GL0108969;T2D-81A_GL0010335;N026A_GL0057816;O2.UC37-1_GL0086779;MH0185_GL0118033;MH0251_GL0110839	Bacterial Non-GH Protein	2	3	2	6	3	3	3	5	0	0	0	2	0	0	0	1	0	0	0	0	0	0	0	0	0	0	0	9111100	0	0	0	0
MH0244_GL0115966;DOM005_GL0024379;MH0012_GL0089997;T2D-113A_GL0007433;N087A_GL0004698;MH0440_GL0196324;MH0326_GL0070644;NOF010_GL0049388	Bacterial Non-GH Protein	4	2	4	7	1	1	7	6	1	0	0	1	0	1	0	1	0	0	0	0	0	0	0	0	0	0	0	0	0	0	0	2678100
MH0250_GL0004191	Bacterial Non-GH Protein	6	8	5	8	6	7	7	6	1	1	1	1	1	1	1	1	1	1	1	1	1	1	1	1	0	0	0	0	0	0	0	29152000
MH0250_GL0240278	Bacterial Non-GH Protein	1	0	0	0	1	1	1	0	1	0	0	0	0	0	0	0	1	0	0	0	0	0	0	0	2076600	0	0	0	0	0	0	0
sp|Q16819|MEP1A_HUMAN;Q16819	Other Human Protein	7	7	4	7	7	6	0	1	7	7	4	7	7	0	6	1	7	7	4	7	7	6	0	1	79836000	73622000	58203000	92394000	156870000	222760000	0	0
MH0084_GL0007284;T2D-135A_GL0112865;N013A_GL0082346;MH0356_GL0186141;NOF013_GL0055382;SZEY-59A_GL0047580;MH0003_GL0099583;NOF010_GL0082312;MH0239_GL0168447;MH0111_GL0033762;MH0012_GL0027540;O2.UC58-2_GL0033913;MH0430_GL0118485;MH0407_GL0206150;MH0281_GL0137595;MH0265_GL0051400;MH0181_GL0016731;MH0093_GL0070998;MH0057_GL0033789;MH0025_GL0081434;V1.UC55-4_GL0234550	Bacterial Non-GH Protein	5	4	4	6	2	2	6	5	2	2	2	3	1	3	0	3	2	2	2	3	1	0	3	3	79696000	73563000	35849000	34939000	0	0	95494000	59376000
sp|P12821|ACE_HUMAN;P12821	Other Human Protein	5	6	6	9	14	14	13	11	5	6	6	9	14	13	14	11	5	6	6	9	14	14	13	11	60998000	70969000	15903000	84651000	413180000	557400000	184120000	270100000
V1.CD52-0_GL0159952;MH0261_GL0084301;MH0267_GL0122652;V1.UC64-0_GL0120662;O2.UC26-2_GL0075538;MH0123_GL0062695;DOM017_GL0074050;MH0333_GL0070938;MH0101_GL0056593;V1.CD3-3-PN_GL0055179;MH0309_GL0055694;V1.UC51-4_GL0163331;DOM017_GL0023024	Bacterial Non-GH Protein	5	4	4	5	5	4	2	2	1	0	0	1	1	0	0	0	1	0	0	1	1	0	0	0	0	0	0	0	4334400	0	0	0
MH0264_GL0094191;MH0011_GL0096107	Bacterial Non-GH Protein	3	4	4	3	1	3	5	3	1	1	1	0	0	1	0	0	1	1	1	0	0	0	1	0	0	0	0	0	0	0	123340000	0
MH0267_GL0090011;T2D-135A_GL0100872	Glucosidase	0	14	0	16	0	2	0	16	0	1	0	2	0	0	0	2	0	0	0	1	0	0	0	1	0	0	0	36410000	0	0	0	29384000		Type 2
MH0267_GL0189635;N075A_GL0075368;T2D-12A_GL0013800;O2.UC41-1_GL0117123;MH0150_GL0126604;MH0054_GL0051226;MH0041_GL0024793;MH0060_GL0072794;NOM023_GL0009554;N064A_GL0011875	Bacterial Non-GH Protein	3	3	5	6	5	4	6	4	0	0	0	0	1	0	0	0	0	0	0	0	1	0	0	0	0	0	0	0	0	0	0	0
MH0268_GL0082510;MH0251_GL0134247;MH0193_GL0009758;O2.UC49-0_GL0160202;MH0339_GL0212972;MH0435_GL0115537;O2.UC56-0_GL0105551;V1.CD34-0_GL0162787	Bacterial Non-GH Protein	7	6	12	13	11	12	10	10	0	1	1	1	0	0	1	1	0	0	0	0	0	0	0	0	0	0	0	0	0	0	0	3175500
MH0268_GL0083982;T2D-109A_GL0146172;MH0086_GL0001064	Glucosidase	1	2	0	7	0	2	0	2	0	1	0	6	0	0	1	1	0	1	0	6	0	1	0	1	0	0	0	679620000	0	0	0	0		Type 1
MH0270_GL0089771;O2.UC28-1_GL0174977	Bacterial Non-GH Protein	5	5	5	7	4	5	2	1	0	1	0	1	0	0	0	0	0	0	0	0	0	0	0	0	0	0	0	3629800	0	0	0	0
MH0354_GL0031183;MH0270_GL0103434;O2.UC41-2_GL0015949	Bacterial Non-GH Protein	1	0	6	6	0	0	4	3	0	0	0	0	0	1	0	0	0	0	0	0	0	0	0	0	0	0	0	0	0	0	9669600	0
MH0271_GL0133192;MH0109_GL0030654	Bacterial Non-GH Protein	5	5	5	5	5	5	6	6	0	0	0	0	0	1	0	1	0	0	0	0	0	0	1	1	0	0	0	0	0	0	0	3010900
MH0271_GL0142757;MH0096_GL0093929	Bacterial Non-GH Protein	5	7	7	8	6	6	6	7	0	1	0	1	0	0	0	0	0	0	0	0	0	0	0	0	0	0	0	6411600	0	0	0	0
MH0272_GL0153976;MH0131_GL0135407	Bacterial Non-GH Protein	1	0	6	6	0	0	5	6	0	0	5	5	0	5	0	5	0	0	1	1	0	0	1	1	0	0	37272000	36793000	0	0	51606000	82278000
sp|Q14002|CEAM7_HUMAN;Q14002	Other Human Protein	4	4	4	3	3	4	0	0	4	4	4	3	3	0	4	0	4	4	4	3	3	4	0	0	108280000	70626000	107830000	113610000	55623000	44147000	0	0
MH0274_GL0015594	Other Bacterial GH Protein	0	7	0	5	0	3	0	9	0	0	0	0	0	0	0	1	0	0	0	0	0	0	0	1	0	0	0	0	0	0	0	66442000
V1.UC51-4_GL0052281;N042A_GL0075265;O2.UC3-2_GL0033882;V1.UC52-0_GL0144520;MH0088_GL0090144	Bacterial Non-GH Protein	2	3	4	5	4	5	6	6	2	3	4	5	4	6	5	6	1	2	2	3	3	3	4	4	65473000	66264000	54163000	50423000	57057000	55054000	76790000	131390000
MH0006_GL0072988;MH0385_GL0129792;MH0447_GL0200153	Glucosidase	1	10	0	1	0	0	0	13	1	8	0	0	0	0	0	12	1	8	0	0	0	0	0	12	0	65949000	0	0	0	0	0	290790000		Type 1
MH0276_GL0031974;O2.UC37-0_GL0094710;O2.UC18-1_GL0179660;O2.UC15-1_GL0021764	Bacterial Non-GH Protein	0	1	0	1	1	2	2	2	0	1	0	1	1	2	2	2	0	1	0	1	1	2	2	2	0	0	0	0	0	11616000	7960500	13348000
MH0276_GL0233441;V1.CD38-0_GL0114282	Bacterial Non-GH Protein	2	1	10	10	4	8	0	0	2	1	10	10	4	0	8	0	2	1	10	10	4	8	0	0	14992000	0	155280000	206010000	43645000	32607000	0	0
V1.UC47-4_GL0146516;MH0326_GL0013794;N085A_GL0013854;MH0188_GL0181618;MH0244_GL0002078;DOF003_GL0074228;MH0414_GL0114604;MH0143_GL0133978;V1.CD38-0_GL0131953;T2D-48A_GL0010362;T2D-135A_GL0072955;T2D-113A_GL0098210;MH0267_GL0037758;DOM005_GL0023957;MH0239_GL0083005;MH0152_GL0037294;MH0101_GL0055230;MH0028_GL0032046;MH0113_GL0000023;NOF013_GL0053112;O2.UC1-1_GL0125640;MH0055_GL0024953;N089A_GL01166…	Bacterial Non-GH Protein	6	7	6	8	4	4	8	6	6	7	6	8	4	8	4	6	1	1	1	1	1	1	1	1	63560000	64887000	40239000	69310000	15074000	25250000	104350000	127030000
O2.UC46-1_GL0033505	Bacterial Non-GH Protein	4	5	0	0	0	1	2	3	4	5	0	0	0	2	1	3	4	5	0	0	0	1	2	3	82106000	64489000	0	0	0	0	5623100	5810000
MH0284_GL0096315	Bacterial Non-GH Protein	4	4	4	5	3	4	5	3	0	0	0	1	0	1	0	0	0	0	0	1	0	0	1	0	0	0	0	0	0	0	10424000	0
T2D-62A_GL0003588;V1.CD3-0-PN_GL0134273;MH0447_GL0279480	Glucuronidase	0	5	0	4	0	4	0	5	0	1	0	0	0	0	0	0	0	1	0	0	0	0	0	0	0	63695000	0	0	0	0	0	0	No loop
V1.CD17-4_GL0084307	Glucuronidase	0	18	0	8	0	5	0	13	0	2	0	0	0	0	0	1	0	2	0	0	0	0	0	1	0	63651000	0	0	0	0	0	0	No loop
MH0288_GL0048586;NLM008_GL0021843;MH0439_GL0029603	Bacterial Non-GH Protein	5	6	8	10	6	7	2	4	0	1	0	1	0	0	0	0	0	0	0	0	0	0	0	0	0	0	0	6411100	0	0	0	0
sp|P01011|AACT_HUMAN;P01011	Other Human Protein	7	4	5	7	7	5	6	6	7	4	5	7	7	6	5	6	7	4	5	7	7	5	6	6	96079000	62803000	61997000	79675000	85988000	89188000	80796000	98585000
MH0001_GL0011670;V1.CD34-0_GL0011262	Glucosidase	0	6	0	3	0	16	0	4	0	2	0	0	0	0	12	0	0	1	0	0	0	4	0	0	0	62261000	0	0	0	262660000	0	0		Type 1
sp|P80188|NGAL_HUMAN;P80188	Other Human Protein	3	3	3	3	3	3	4	4	3	3	3	3	3	4	3	4	3	3	3	3	3	3	4	4	56596000	59488000	63793000	62963000	49096000	57990000	92877000	76473000
sp|P40879|S26A3_HUMAN;P40879	Other Human Protein	5	5	5	6	3	3	2	3	5	5	5	6	3	2	3	3	5	5	5	6	3	3	2	3	39815000	56790000	33829000	45105000	18639000	54236000	4710500	3848600
MH0298_GL0091968;MH0186_GL0030835	Bacterial Non-GH Protein	13	14	15	17	11	12	17	16	0	0	0	0	0	1	0	1	0	0	0	0	0	0	0	0	0	0	0	0	0	0	0	2940700
MH0301_GL0041359	Bacterial Non-GH Protein	3	2	3	2	1	0	2	2	1	1	1	1	0	1	0	1	1	1	1	1	0	0	1	1	0	0	0	0	0	0	0	5231000
MH0302_GL0047786	Glucosidase	0	10	0	12	0	2	0	13	0	1	0	1	0	0	0	1	0	1	0	1	0	0	0	1	0	0	0	0	0	0	0	9555500		Type 2
MH0303_GL0079397;V1.CD1-0-PN_GL0159298;O2.UC47-2_GL0021424	Bacterial Non-GH Protein	5	6	14	15	10	11	11	11	0	0	1	1	1	1	1	1	0	0	0	0	0	0	0	0	0	0	0	0	0	0	0	865570
MH0305_GL0100771	Bacterial Non-GH Protein	5	5	8	9	8	8	7	6	0	1	1	1	1	1	1	1	0	0	0	0	0	0	0	0	0	0	0	0	0	0	0	70223000
MH0308_GL0027577	Bacterial Non-GH Protein	3	4	2	3	4	4	1	2	0	1	0	1	0	0	0	0	0	1	0	1	0	0	0	0	0	0	0	8940800	0	0	0	0
MH0308_GL0096348;V1.UC13-3_GL0148331	Bacterial Non-GH Protein	7	7	11	11	8	7	8	9	0	0	1	1	0	0	0	1	0	0	0	0	0	0	0	0	0	0	0	0	0	0	0	1317000
MH0308_GL0100836	Bacterial Non-GH Protein	3	2	0	0	0	0	1	1	3	2	0	0	0	1	0	1	3	2	0	0	0	0	1	1	19744000	0	0	0	0	0	0	0
MH0308_GL0182276;MH0181_GL0085873;MH0144_GL0024475;MH0181_GL0064556;DLM004_GL0013489;V1.FI24_GL0001408	Bacterial Non-GH Protein	0	0	4	4	0	0	0	1	0	0	4	4	0	0	0	1	0	0	4	4	0	0	0	1	0	0	950840000	444490000	0	0	0	0
MH0309_GL0041150	Glucosidase	0	1	0	7	0	0	1	4	0	0	0	6	0	1	0	3	0	0	0	3	0	0	1	2	0	0	0	66383000	0	0	0	51976000		Type 2
T2D-48A_GL0123061;N085A_GL0009271	Bacterial Non-GH Protein	4	4	5	5	3	2	6	5	3	3	4	4	3	5	2	4	0	0	0	0	0	0	1	1	47118000	56787000	75201000	104840000	24476000	24559000	169590000	163740000
O2.UC48-0_GL0026590	Bacterial Non-GH Protein	3	4	2	3	0	0	3	4	3	4	2	3	0	3	0	4	3	4	2	3	0	0	3	4	45679000	56047000	17329000	16761000	0	0	0	15888000
SZEY-66A_GL0066199	Glucosidase	0	7	0	17	0	16	0	2	0	4	0	14	0	0	13	0	0	0	0	2	0	2	0	0	0	55416000	0	317870000	0	260850000	0	0		Type 1
MH0309_GL0108525	Bacterial Non-GH Protein	3	2	3	4	1	1	4	5	0	0	0	0	0	0	0	1	0	0	0	0	0	0	0	1	0	0	0	0	0	0	0	10190000
MH0309_GL0155114	Unknown	0	0	0	1	1	0	5	7	0	0	0	1	1	5	0	7	0	0	0	1	1	0	5	7	0	0	0	0	0	0	44707000	67833000
T2D-135A_GL0010089;MH0310_GL0076642;MH0415_GL0203731;V1.UC57-0_GL0215225;V1.CD38-0_GL0031123;T2D-135A_GL0021003;T2D-110A_GL0067720;NOM023_GL0003747;NOF013_GL0031085;MH0381_GL0145739;MH0238_GL0138772;MH0152_GL0006409	Bacterial Non-GH Protein	0	0	0	2	0	0	2	2	0	0	0	2	0	2	0	2	0	0	0	2	0	0	2	2	0	0	0	4930700	0	0	9901600	7994600
MH0314_GL0009219;MH0055_GL0069463	Glucosidase	0	6	0	4	0	4	0	5	0	1	0	1	0	0	1	1	0	1	0	1	0	1	0	1	0	0	0	0	0	0	0	30415000		Type 1;Type 2
MH0318_GL0059809	Bacterial Non-GH Protein	3	3	1	3	22	20	2	2	1	1	0	2	20	0	18	0	1	1	0	2	20	18	0	0	0	0	0	8886500	513040000	98619000	0	0
MH0318_GL0140812;V1.CD35-0_GL0044518;O2.UC37-0_GL0040837;O2.UC24-2_GL0129655;655811.HMPREF0078_1362;T2D-46A_GL0018242;MH0277_GL0055128;MH0275_GL0023893;MH0358_GL0046174;T2D-62A_GL0053634;SZEY-10A_GL0027684;O2.UC48-0_GL0026627;DLM013_GL0065453;MH0398_GL0063820;411467.BACCAP_01542;V1.CD37-4_GL0037087	Bacterial Non-GH Protein	2	2	1	2	0	0	1	1	1	1	0	1	0	1	0	1	1	1	0	1	0	0	1	1	0	0	0	0	0	0	0	1887100
O2.UC15-0_GL0065244	Glucuronidase	0	1	0	7	0	2	0	1	0	0	0	6	0	0	1	0	0	0	0	6	0	1	0	0	0	0	0	30442000	0	0	0	0	No loop
MH0284_GL0116366;MH0035_GL0038015;MH0456_GL0073832;T2D-187A_GL0096497;MH0389_GL0091261;MH0049_GL0043696;V1.FI10_GL0006312;518637.EUBIFOR_01208;V1.UC52-0_GL0165898	Bacterial Non-GH Protein	7	8	7	7	4	4	0	0	2	4	2	2	0	0	0	0	2	4	2	2	0	0	0	0	51621000	55328000	15971000	20511000	0	0	0	0
MH0055_GL0046639;MH0385_GL0034765;MH0329_GL0189239;MH0385_GL0110606;O2.UC12-2_GL0124162;NLM008_GL0047541	Bacterial Non-GH Protein	8	7	10	11	7	10	2	2	8	7	10	11	7	2	10	2	0	0	1	1	1	1	0	0	89894000	54014000	249000000	292360000	51862000	72714000	16222000	24893000
MH0329_GL0111253;MH0127_GL0045140;DOF008_GL0052059;DOF010_GL0002376;MH0310_GL0093428;MH0108_GL0046733	Bacterial Non-GH Protein	6	6	10	11	4	6	5	5	0	1	1	2	0	1	1	0	0	0	0	0	0	0	0	0	0	0	0	36061000	0	0	0	0
MH0333_GL0058034	Glucosidase	0	10	0	13	0	2	0	13	0	0	0	1	0	0	0	0	0	0	0	0	0	0	0	0	0	0	0	4251700	0	0	0	0		Type 2
MH0086_GL0023405	Bacterial Non-GH Protein	4	4	2	3	4	4	4	4	4	4	2	3	4	4	4	4	4	4	2	3	4	4	4	4	71198000	53952000	28325000	30532000	30635000	40016000	38962000	40754000
V1.CD46-0_GL0107005;O2.CD2-0-PT_GL0003285;MH0333_GL0091784;MH0370_GL0032429	Bacterial Non-GH Protein	2	2	1	3	2	1	2	1	1	0	0	1	0	0	0	0	1	0	0	1	0	0	0	0	0	0	0	19939000	0	0	0	0
O2.UC38-1_GL0149728;MH0333_GL0111653	Bacterial Non-GH Protein	1	0	0	0	0	0	0	0	1	0	0	0	0	0	0	0	1	0	0	0	0	0	0	0	10388000	0	0	0	0	0	0	0
MH0356_GL0190005	Bacterial Non-GH Protein	7	9	5	8	0	0	0	0	7	9	5	8	0	0	0	0	7	9	5	8	0	0	0	0	57896000	52630000	46594000	52541000	0	0	0	0
MH0335_GL0082025;O2.CD2-0-PT_GL0033647;V1.CD7-4_GL0105831;O2.UC48-0_GL0315299;MH0128_GL0076112;V1.FI14_GL0140100;MH0131_GL0109486;O2.UC14-1_GL0029020;O2.UC18-1_GL0157716;MH0370_GL0123811;O2.UC35-0_GL0137417;MH0143_GL0023235;O2.UC32-1_GL0028839;MH0246_GL0010003;411486.CLOM621_07813	Bacterial Non-GH Protein	1	2	2	1	3	3	2	3	1	2	2	1	3	2	3	3	1	2	2	1	3	3	2	3	0	0	0	0	18225000	15538000	9965000	12244000
MH0336_GL0092499	Bacterial Non-GH Protein	3	3	3	2	3	3	3	5	0	0	0	0	0	0	0	1	0	0	0	0	0	0	0	1	0	0	0	0	0	0	0	3042100
MH0337_GL0105979;MH0283_GL0006289;MH0168_GL0030721	Bacterial Non-GH Protein	7	7	11	12	11	11	12	10	1	0	0	0	0	2	0	2	0	0	0	0	0	0	0	0	0	0	0	0	0	0	16460000	9798200
MH0338_GL0026893	Other Bacterial GH Protein	0	1	0	2	0	0	0	0	0	0	0	1	0	0	0	0	0	0	0	1	0	0	0	0	0	0	0	7087100	0	0	0	0
MH0342_GL0128385;V1.CD34-0_GL0074451;MH0385_GL0098385	Bacterial Non-GH Protein	5	5	9	11	4	6	5	6	0	0	0	1	0	0	0	0	0	0	0	1	0	0	0	0	0	0	0	2774400	0	0	0	0
MH0345_GL0010663	Bacterial Non-GH Protein	3	3	3	3	2	0	1	2	1	1	1	1	1	0	0	1	0	0	0	0	0	0	0	0	0	0	0	0	0	0	0	14451000
MH0345_GL0041687	Bacterial Non-GH Protein	0	0	1	1	0	0	0	0	0	0	1	1	0	0	0	0	0	0	1	1	0	0	0	0	0	0	0	7156400	0	0	0	0
MH0345_GL0060733	Other Bacterial GH Protein	0	1	0	1	0	4	0	1	0	0	0	0	0	0	2	0	0	0	0	0	0	2	0	0	0	0	0	0	0	48262000	0	0
MH0345_GL0135309	Bacterial Non-GH Protein	1	2	2	2	2	2	3	4	0	0	0	0	0	0	0	1	0	0	0	0	0	0	0	1	0	0	0	0	0	0	0	13265000
MH0402_GL0101517	Other Bacterial GH Protein	0	3	0	1	0	0	0	3	0	3	0	1	0	0	0	3	0	3	0	1	0	0	0	3	0	51635000	0	0	0	0	0	18419000
V1.FI33_GL0121072;MH0350_GL0160060;O2.UC55-0_GL0149269;MH0272_GL0037217	Bacterial Non-GH Protein	0	0	2	3	0	1	0	0	0	0	2	3	0	0	1	0	0	0	2	2	0	0	0	0	0	0	0	18063000	0	0	0	0
MH0351_GL0017718	Bacterial Non-GH Protein	6	6	6	6	3	6	2	3	1	1	0	0	0	1	0	1	0	0	0	0	0	0	0	0	0	0	0	0	0	0	0	2891400
MH0354_GL0017731;MH0381_GL0145755;MH0402_GL0100033;MH0274_GL0032134;NOM004_GL0009845;MH0222_GL0040562;MH0115_GL0092410;MH0016_GL0031834;MH0431_GL0114039	Bacterial Non-GH Protein	6	6	8	9	5	6	10	9	1	1	1	1	1	2	0	1	0	0	0	0	0	0	0	0	0	0	0	0	0	0	96278000	0
MH0262_GL0106651;MH0193_GL0015237;V1.UC35-4_GL0121954;O2.UC18-1_GL0054166;MH0118_GL0125128;MH0196_GL0123918;MH0224_GL0048131;T2D-102A_GL0079073;O2.UC48-0_GL0237363;O2.UC38-1_GL0154717;MH0203_GL0172920	Bacterial Non-GH Protein	4	7	0	0	0	0	0	0	4	7	0	0	0	0	0	0	4	5	0	0	0	0	0	0	67090000	51469000	0	0	0	0	0	0
sp|P27487|DPP4_HUMAN;P27487	Other Human Protein	8	8	7	8	8	9	6	8	8	8	7	8	8	6	9	8	8	8	7	8	8	9	6	8	77177000	50601000	55998000	104130000	132300000	133020000	51654000	87269000
sp|P02768|ALBU_HUMAN;CON__P02768-1;P02768	Contaminant - Other	6	7	1	4	1	0	2	1	5	5	0	3	0	0	0	0	5	5	0	3	0	0	0	0	44664000	50000000	0	21714000	0	0	0	0
MH0359_GL0154558	Bacterial Non-GH Protein	5	6	10	10	9	8	9	7	0	0	1	1	0	0	1	0	0	0	1	1	0	1	0	0	0	0	0	0	0	5171900	0	0
MH0360_GL0012356	Bacterial Non-GH Protein	3	3	3	4	3	3	3	3	0	0	0	1	0	0	0	0	0	0	0	1	0	0	0	0	0	0	0	772720	0	0	0	0
MH0362_GL0000429	Bacterial Non-GH Protein	1	0	0	0	0	0	0	0	1	0	0	0	0	0	0	0	1	0	0	0	0	0	0	0	49187000	0	0	0	0	0	0	0
MH0362_GL0016476;MH0447_GL0016616;MH0446_GL0110832;V1.FI04_GL0108132;MH0313_GL0122712;O2.UC29-1_GL0126743;MH0395_GL0135308;V1.UC15-3_GL0000657;MH0406_GL0050856;MH0086_GL0086454;MH0021_GL0065770;MH0453_GL0074397;MH0385_GL0189347;MH0362_GL0062005;MH0182_GL0058092;MH0084_GL0024634;MH0043_GL0066809;MH0028_GL0012465;MH0011_GL0051427;V1.FI21_GL0035543;MH0446_GL0057198;MH0011_GL0051709;MH0212_GL0068413;…	Bacterial Non-GH Protein	4	3	4	3	3	2	3	4	1	0	1	0	0	0	0	1	0	0	0	0	0	0	0	0	0	0	0	0	0	0	0	1045600
MH0362_GL0131704;MH0244_GL0076969;MH0197_GL0128043;MH0370_GL0100181;V1.UC17-2_GL0107278;V1.UC26-4_GL0072732	Bacterial Non-GH Protein	2	1	1	2	2	2	1	0	1	0	0	1	1	1	1	0	1	0	0	1	0	0	0	0	0	0	0	785620	0	0	0	0
MH0363_GL0013820	Bacterial Non-GH Protein	2	2	2	2	2	2	2	2	1	1	1	1	1	1	1	1	1	1	1	1	1	1	1	1	0	0	0	0	0	0	0	13419000
MH0363_GL0040473	Bacterial Non-GH Protein	1	1	0	1	0	0	0	0	1	1	0	1	0	0	0	0	1	1	0	1	0	0	0	0	0	0	0	19082000	0	0	0	0
MH0365_GL0061992	Unknown	2	2	3	3	3	3	1	3	1	1	1	1	1	1	1	1	1	1	1	1	1	1	1	1	0	0	0	0	0	0	0	7564200
SZEY-39A_GL0026430	Unknown	7	7	1	0	1	1	5	2	7	7	1	0	1	5	1	2	0	1	0	0	0	0	0	0	81883000	49175000	0	0	0	0	15599000	18205000
T2D-135A_GL0114499;MH0367_GL0053207	Bacterial Non-GH Protein	1	2	1	3	0	0	2	3	0	1	0	2	0	1	0	2	0	1	0	1	0	0	1	1	0	0	0	3827600	0	0	0	12379000
MH0370_GL0023011	Bacterial Non-GH Protein	4	5	3	4	3	3	6	5	0	1	0	0	0	1	0	1	0	0	0	0	0	0	0	0	0	0	0	0	0	0	0	12429000
MH0370_GL0026965;O2.CD1-0-PT_GL0094791;O2.UC41-1_GL0179212;V1.UC2-4_GL0088670;BGI-33A_GL0009536;MH0192_GL0047795;MH0131_GL0164315;N088A_GL0065559;V1.FI29_GL0065511;O2.UC23-2_GL0124625;V1.CD43-0_GL0061145;MH0442_GL0016356;O2.CD3-0-PT_GL0163955;MH0360_GL0053463;V1.UC50-1_GL0151256;V1.UC54-0_GL0067210;MH0369_GL0144867	Bacterial Non-GH Protein	8	6	5	7	7	6	6	9	2	1	1	1	1	2	1	2	1	1	0	0	0	0	1	1	11565000	0	0	0	0	0	19852000	24110000
MH0092_GL0145387	Bacterial Non-GH Protein	2	2	3	2	1	1	5	5	2	2	3	2	1	5	1	5	0	0	0	0	0	0	0	0	82324000	48159000	20926000	21618000	13262000	13144000	36053000	54384000
T2D-135A_GL0072715	Bacterial Non-GH Protein	4	5	4	4	4	5	2	3	4	5	4	4	4	2	5	3	0	1	0	0	0	1	0	1	79566000	48124000	32266000	31540000	58698000	68802000	43629000	29020000
MH0059_GL0063244	Bacterial Non-GH Protein	2	2	0	1	0	0	1	1	2	2	0	1	0	1	0	1	2	2	0	1	0	0	1	1	48021000	46970000	0	0	0	0	0	0
MH0370_GL0130918	Bacterial Non-GH Protein	1	0	0	0	0	0	0	0	1	0	0	0	0	0	0	0	1	0	0	0	0	0	0	0	6425400	0	0	0	0	0	0	0
MH0373_GL0016988;MH0203_GL0241123;MH0012_GL0220581;O2.UC38-1_GL0033240	Bacterial Non-GH Protein	3	4	4	4	2	3	3	4	0	1	1	1	0	1	0	1	0	0	0	0	0	0	0	0	0	0	0	0	0	0	0	22088000
O2.UC7-1_GL0015069	Bacterial Non-GH Protein	11	7	9	13	1	0	6	7	11	7	9	13	1	6	0	7	9	6	7	11	0	0	4	6	65886000	45957000	98545000	78079000	0	0	23442000	29600000
MH0377_GL0039245	Glucosidase	0	6	0	10	0	10	0	2	0	0	0	1	0	0	1	0	0	0	0	1	0	1	0	0	0	0	0	0	0	33348000	0	0		Type 1
MH0379_GL0037829;O2.UC4-0_GL0003543	Bacterial Non-GH Protein	1	1	1	1	0	0	1	1	1	1	1	1	0	1	0	1	1	1	1	1	0	0	1	1	0	0	0	0	0	0	0	10647000
MH0061_GL0048129;MH0253_GL0219843;T2D-198A_GL0013747	Glucosidase	0	3	0	24	0	2	2	24	0	3	0	24	0	2	2	24	0	0	0	6	0	0	0	5	0	45512000	0	1210900000	0	0	0	1310000000		Type 2
sp|P30740|ILEU_HUMAN;P30740;sp|P50452|SPB8_HUMAN;sp|P50453|SPB9_HUMAN;sp|O75830|SPI2_HUMAN;P50452;P50453;O75830	Other Human Protein	6	8	7	7	6	7	5	7	6	8	7	7	6	5	7	7	6	8	7	7	6	7	5	7	33409000	44184000	38975000	35993000	58181000	85958000	26635000	30738000
MH0381_GL0072590;MH0016_GL0047404;MH0073_GL0043518;MH0407_GL0027115;MH0069_GL0018092	Bacterial Non-GH Protein	5	6	5	7	2	2	7	5	1	1	1	1	0	1	0	1	0	0	0	0	0	0	0	0	0	0	0	0	0	0	0	23603000
MH0381_GL0139391;MH0222_GL0189638;MH0379_GL0145420;MH0016_GL0011920;MH0333_GL0067471;MH0101_GL0007796	Glucosidase	1	11	0	7	0	7	0	12	0	1	0	0	0	0	0	1	0	0	0	0	0	0	0	0	0	0	0	0	0	0	0	321340000		Type 2
O2.UC48-0_GL0256181	Unknown	5	5	0	0	0	0	0	1	5	5	0	0	0	0	0	1	5	5	0	0	0	0	0	1	53521000	43629000	0	0	0	0	0	0
MH0385_GL0159230;DLM019_GL0058627;V1.UC13-3_GL0009937;V1.UC63-0_GL0201967	Bacterial Non-GH Protein	1	1	2	2	3	2	0	0	1	1	2	2	2	0	1	0	1	1	2	2	2	1	0	0	0	0	24494000	33887000	18913000	0	0	0
sp|P12830|CADH1_HUMAN;P12830	Other Human Protein	3	2	3	3	3	3	1	0	3	2	3	3	3	1	3	0	3	2	3	3	3	3	1	0	80172000	42059000	30253000	12128000	28250000	41020000	0	0
MH0389_GL0030631;O2.UC60-0_GL0104984	Glucosidase	0	4	0	5	0	3	0	5	0	1	0	1	0	0	1	1	0	1	0	1	0	1	0	1	0	0	0	0	0	0	0	201000000		Type 2
T2D-22A_GL0131822;MH0389_GL0133677;O2.UC13-0_GL0006635;V1.CD3-0-PN_GL0134229;MH0006_GL0060386;MH0014_GL0082366;MH0006_GL0210894;MH0006_GL0146667;MH0400_GL0010619;MH0362_GL0043480;N017A_GL0069068;MH0347_GL0094203;MH0316_GL0039921;V1.CD34-0_GL0005736;MH0394_GL0161118;V1.UC55-4_GL0142698;O2.UC30-1_GL0138478;V1.CD24-0_GL0069879;T2D-35A_GL0002881;T2D-187A_GL0094955;T2D-11A_GL0001632;O2.UC28-2_GL012422…	Bacterial Non-GH Protein	3	3	4	4	4	3	2	2	0	1	1	1	1	1	1	1	0	0	0	0	0	0	0	0	0	0	0	0	0	0	0	4179600
MH0389_GL0169885;O2.UC28-0_GL0069089;MH0204_GL0192059	Bacterial Non-GH Protein	6	6	6	5	7	7	6	6	0	0	0	0	1	0	1	0	0	0	0	0	0	0	0	0	0	0	0	0	0	8351800	0	0
MH0267_GL0061095;T2D-73A_GL0000733;O2.UC4-1_GL0110892;O2.UC30-1_GL0100925;NOF010_GL0024476;MH0275_GL0065942;MH0264_GL0057612;MH0260_GL0140233;MH0239_GL0000055;MH0221_GL0060760;MH0205_GL0040354;MH0203_GL0071601;MH0193_GL0185667;MH0049_GL0025273;MH0002_GL0036851;DOM022_GL0042651;DLM019_GL0054090;V1.UC49-1_GL0090679;MH0402_GL0159669;T2D-198A_GL0057590;MH0349_GL0172958;MH0393_GL0099798;MH0222_GL00652…	Bacterial Non-GH Protein	6	7	7	9	4	6	8	8	3	4	4	6	1	5	4	5	0	0	0	0	0	0	0	0	36534000	41806000	74108000	159170000	0	28016000	173090000	174160000
MH0203_GL0187241;O2.UC13-1_GL0076494;T2D-187A_GL0007360;V1.CD36-0_GL0050585;MH0383_GL0078874;MH0176_GL0013633;NLM010_GL0010502	Glucuronidase	0	2	0	11	0	2	0	7	0	0	0	10	0	0	0	5	0	0	0	5	0	0	0	2	0	0	0	74847000	0	0	0	29642000	No loop
MH0448_GL0197142;MH0415_GL0079754;MH0396_GL0108431;MH0408_GL0039088;MH0309_GL0089969;MH0132_GL0069053;O2.UC13-1_GL0057281;MH0374_GL0024997	Bacterial Non-GH Protein	1	1	2	2	0	0	5	5	0	0	0	1	0	2	0	2	0	0	0	0	0	0	0	0	0	0	0	0	0	0	24651000	15481000
MH0402_GL0003569;MH0243_GL0027414	Other Bacterial GH Protein	1	10	0	6	0	10	0	8	0	2	0	0	0	0	2	1	0	1	0	0	0	1	0	1	0	0	0	0	0	12410000	0	0
MH0402_GL0041298	Bacterial Non-GH Protein	1	3	2	3	3	2	3	2	0	1	1	1	1	1	1	1	0	1	1	1	1	1	1	1	0	0	0	0	0	0	0	8045900
MH0402_GL0062429	Bacterial Non-GH Protein	10	10	9	11	3	7	10	11	0	1	0	0	0	0	0	1	0	0	0	0	0	0	0	0	0	0	0	0	0	0	0	20674000
MH0402_GL0081364;V1.CD32-4_GL0119652;BGI003A_GL0106812;T2D-48A_GL0042986;NLF006_GL0004930;MH0038_GL0049041	Bacterial Non-GH Protein	2	1	0	0	0	0	0	1	2	1	0	0	0	0	0	1	2	1	0	0	0	0	0	1	7953300	0	0	0	0	0	0	0
MH0275_GL0144248	Other Bacterial GH Protein	0	8	0	7	0	0	0	1	0	8	0	7	0	0	0	1	0	2	0	1	0	0	0	0	0	40572000	0	39047000	0	0	0	0
MH0402_GL0116270	Bacterial Non-GH Protein	1	1	2	1	1	1	0	1	0	0	1	0	0	0	0	0	0	0	1	0	0	0	0	0	0	0	0	0	0	0	0	0
MH0403_GL0136097;V1.UC39-0_GL0010498	Bacterial Non-GH Protein	8	8	8	8	7	8	6	7	1	1	1	1	1	0	1	0	0	0	0	0	0	0	0	0	0	0	0	0	0	9762000	0	0
MH0414_GL0040113;MH0404_GL0064656;N087A_GL0059320;MH0333_GL0041706;MH0101_GL0103352;O2.UC56-0_GL0112411;O2.UC38-1_GL0079991;DOM019_GL0099982	Bacterial Non-GH Protein	6	6	2	3	0	3	3	6	0	0	0	0	0	0	0	1	0	0	0	0	0	0	0	0	0	0	0	0	0	0	0	0
MH0406_GL0015896	Bacterial Non-GH Protein	5	4	5	4	4	4	5	5	1	0	1	0	0	1	0	1	0	0	0	0	0	0	1	0	0	0	0	0	0	0	6550000	0
V1.UC5-0_GL0111718;MH0234_GL0004116;MH0428_GL0106450	Bacterial Non-GH Protein	5	4	8	8	3	5	3	3	5	4	8	8	3	3	5	3	0	0	3	3	1	2	0	0	62163000	40075000	204100000	175090000	39101000	41103000	47383000	81772000
MH0406_GL0139031;MH0445_GL0066110	Bacterial Non-GH Protein	6	7	12	13	12	13	11	9	0	0	0	0	1	0	1	0	0	0	0	0	0	0	0	0	0	0	0	0	0	4558200	0	0
MH0407_GL0133780;BGI-15A_GL0010950;MH0337_GL0114912;MH0158_GL0042197;MH0031_GL0040882;MH0009_GL0038779;MH0339_GL0086439;O2.UC28-1_GL0054731;MH0189_GL0017950;MH0118_GL0060573;MH0445_GL0026438;MH0437_GL0121464;V1.UC31-4_GL0142171;MH0090_GL0006070	Bacterial Non-GH Protein	9	7	13	14	9	10	11	10	1	1	1	1	0	1	0	1	0	0	0	0	0	0	0	0	0	0	0	0	0	0	0	1498600
MH0407_GL0139528;MH0143_GL0083186;NOF013_GL0058104	Bacterial Non-GH Protein	2	2	4	5	1	2	4	5	0	0	0	1	0	0	0	1	0	0	0	0	0	0	0	0	0	0	0	0	0	0	0	2907400
MH0407_GL0142364;V1.UC14-1_GL0084801	Unknown	1	1	1	1	1	1	2	2	0	0	0	0	0	1	0	1	0	0	0	0	0	0	1	1	0	0	0	0	0	0	0	96973000
V1.CD1-0-PN_GL0073475;V1.FI10_GL0034743;NLF009_GL0047697	Bacterial Non-GH Protein	4	5	10	11	6	8	11	10	4	5	10	11	6	11	8	10	0	0	0	0	0	0	0	0	30593000	39813000	256410000	279760000	94885000	111920000	771150000	1022700000
MH0003_GL0102912;MH0198_GL0129173	Glucuronidase	0	8	0	5	0	9	0	7	0	5	0	3	0	0	6	4	0	3	0	1	0	4	0	2	0	39448000	0	6792000	0	134860000	0	28044000	Mini-Loop 1
MH0414_GL0071575	Bacterial Non-GH Protein	2	1	1	2	1	1	2	2	1	0	0	0	0	0	0	0	1	0	0	0	0	0	0	0	1283400	0	0	0	0	0	0	0
MH0414_GL0074339;O2.UC29-1_GL0164645;MH0381_GL0042081;MH0222_GL0040869	Bacterial Non-GH Protein	6	6	5	6	5	4	7	6	1	1	0	1	0	1	0	1	0	0	0	0	0	0	0	0	0	0	0	0	0	0	0	18837000
MH0415_GL0055935;MH0163_GL0021196	Bacterial Non-GH Protein	7	7	7	9	4	5	8	8	1	1	1	1	0	1	0	1	0	0	0	0	0	0	0	0	0	0	0	0	0	0	0	5143900
MH0415_GL0178143;MH0077_GL0040461;MH0411_GL0030083;MH0097_GL0090701;MH0189_GL0023324;MH0264_GL0042968;MH0145_GL0101705;MH0175_GL0013186;MH0298_GL0109156;MH0391_GL0147959;MH0198_GL0110255;MH0329_GL0095465;MH0252_GL0224159;N038A_GL0047163;ED16A_GL0038963;MH0298_GL0113091;MH0437_GL0232143;MH0427_GL0046839;MH0158_GL0016039;MH0267_GL0164373;MH0407_GL0075574;BGI002A_GL0090162;MH0319_GL0114589;V1.CD38-0…	Unknown	4	3	3	3	2	2	5	4	1	1	0	0	1	1	1	1	1	1	0	0	1	1	1	1	0	0	0	0	0	0	0	9780600
MH0415_GL0210454;DOM013_GL0034020	Bacterial Non-GH Protein	1	0	7	7	0	0	3	3	1	0	7	7	0	3	0	3	0	0	0	0	0	0	0	0	0	0	26498000	41376000	0	0	38259000	79955000
MH0416_GL0095299;SZEY-74A_GL0046550;MH0111_GL0039985	Bacterial Non-GH Protein	0	0	2	4	0	0	0	0	0	0	1	1	0	0	0	0	0	0	1	1	0	0	0	0	0	0	0	11149000	0	0	0	0
MH0419_GL0053670	Bacterial Non-GH Protein	3	5	3	7	5	5	6	6	0	1	0	1	0	2	0	1	0	0	0	0	0	0	0	0	0	0	0	0	0	0	0	1288400
MH0421_GL0142722	Glucosidase	2	11	0	12	0	12	1	4	0	1	0	1	0	0	1	0	0	0	0	0	0	0	0	0	0	0	0	0	0	75530000	0	0		Type 1
MH0422_GL0130076;O2.UC28-2_GL0009776	Bacterial Non-GH Protein	4	4	4	4	4	4	4	4	1	1	1	1	1	1	1	1	1	1	1	1	1	1	1	1	0	0	0	0	0	0	0	5094200
V1.UC17-0_GL0030508;V1.CD49-0_GL0054954;MH0051_GL0032463	Bacterial Non-GH Protein	7	7	6	6	5	6	5	6	1	1	0	0	0	0	0	0	1	1	0	0	0	0	0	0	0	39392000	0	0	0	0	0	0
MH0433_GL0079729	Bacterial Non-GH Protein	2	1	2	2	1	1	1	2	1	1	1	1	1	1	0	1	1	1	1	1	1	0	1	1	0	0	0	0	0	0	0	23644000
MH0438_GL0078902	Bacterial Non-GH Protein	3	3	2	3	3	3	4	5	0	0	0	0	0	1	0	1	0	0	0	0	0	0	1	1	0	0	0	0	0	0	0	6249200
MH0452_GL0004688;MH0441_GL0093504;O2.UC32-0_GL0040682	Bacterial Non-GH Protein	0	0	1	1	0	0	0	0	0	0	1	1	0	0	0	0	0	0	1	1	0	0	0	0	0	0	0	14953000	0	0	0	0
MH0442_GL0199411	Bacterial Non-GH Protein	7	6	12	13	11	11	11	9	1	0	1	1	0	1	0	1	0	0	0	0	0	0	0	0	0	0	0	0	0	0	0	347370
MH0013_GL0018466	Glucosidase	0	9	0	15	0	6	1	15	0	9	0	15	0	1	6	15	0	2	0	6	0	2	0	7	0	39036000	0	186450000	0	166390000	0	193920000		Type 2
DLM013_GL0002845;T2D-31A_GL0079972	Bacterial Non-GH Protein	5	4	1	0	1	1	0	1	5	4	1	0	1	0	1	1	5	4	1	0	1	1	0	1	31310000	38069000	0	0	0	0	0	0
MH0453_GL0035804;MH0333_GL0121497;MH0270_GL0082631;NLM026_GL0035716;V1.UC40-0_GL0130575;V1.FI35_GL0041213;N047A_GL0010919;T2D-6A_GL0026333;V1.FI06_GL0132119;O2.UC17-1_GL0120526;V1.FI21_GL0077448;MH0179_GL0002190;O2.UC21-1_GL0069971	Bacterial Non-GH Protein	1	1	5	5	1	1	4	4	0	0	1	1	0	0	0	0	0	0	1	1	0	0	0	0	0	0	0	5395200	0	0	0	0
V1.UC50-1_GL0015081;O2.UC31-1_GL0030012;MH0457_GL0135558;V1.FI17_GL0089300	Bacterial Non-GH Protein	0	1	1	2	1	0	1	1	0	0	0	1	0	0	0	1	0	0	0	1	0	0	0	1	0	0	0	0	0	0	0	13457000
MH0458_GL0024307	Glucosidase	0	1	0	0	0	0	0	2	0	0	0	0	0	0	0	1	0	0	0	0	0	0	0	1	0	0	0	0	0	0	0	14207000		Type 2
MH0462_GL0146369;NOF010_GL0066694;N085A_GL0033844	Bacterial Non-GH Protein	5	5	9	11	6	8	11	10	1	1	1	1	1	1	1	1	0	0	0	0	0	0	0	0	0	0	0	0	0	0	0	231760000
MH0002_GL0039389;MH0116_GL0105028;MH0111_GL0032067	Bacterial Non-GH Protein	7	7	7	8	3	6	2	1	2	3	2	3	0	0	1	0	2	3	2	3	0	1	0	0	65715000	37568000	19338000	20077000	0	0	0	0
N020A_GL0072634;V1.CD38-0_GL0021760;T2D-135A_GL0116720;MH0267_GL0068816	Bacterial Non-GH Protein	3	4	4	7	2	4	7	8	0	0	0	0	0	1	1	0	0	0	0	0	0	1	1	0	0	0	0	0	0	9381900	0	0
MH0162_GL0058027;MH0009_GL0052223	Bacterial Non-GH Protein	5	6	7	9	4	6	4	5	2	2	3	3	1	2	2	3	0	0	0	0	0	0	0	0	34923000	37350000	17177000	35200000	0	12002000	6420400	12797000
N032A_GL0028271	Bacterial Non-GH Protein	0	2	4	6	2	2	3	2	0	0	0	1	0	0	0	0	0	0	0	1	0	0	0	0	0	0	0	21530000	0	0	0	0
N035A_GL0009872;MH0448_GL0074549	Unknown	1	1	2	1	1	0	4	3	1	1	2	1	1	4	0	3	1	1	2	1	1	0	4	3	0	0	0	0	0	0	23193000	20650000
MH0356_GL0178150;T2D-22A_GL0014686;T2D-8A_GL0098755;T2D-70A_GL0116047	Glucosidase	1	13	2	15	1	2	1	8	0	2	0	1	0	0	0	0	0	1	0	0	0	0	0	0	0	37348000	0	0	0	0	0	0		Type 2
N085A_GL0004543;T2D-122A_GL0057075;MH0298_GL0130723;NOF013_GL0081193;MH0328_GL0038264;MH0267_GL0148899;MH0101_GL0091442;MH0068_GL0028514;MH0012_GL0052005;MH0006_GL0040558;DOM022_GL0032397	Bacterial Non-GH Protein	0	1	1	1	0	0	4	4	0	1	1	1	0	4	0	4	0	1	1	1	0	0	3	3	0	0	0	0	0	0	30752000	43328000
MH0162_GL0152812;MH0006_GL0152623;V1.UC47-4_GL0042240;O2.UC12-1_GL0042227;MH0288_GL0174253;MH0088_GL0054362;MH0012_GL0145794;DOF010_GL0001464;MH0035_GL0011151;O2.UC30-1_GL0012518;O2.UC28-0_GL0117866;O2.UC8-0_GL0141476;MH0358_GL0029049;MH0451_GL0003797;MH0200_GL0108965;T2D-51A_GL0153538;O2.UC27-0_GL0068000;MH0006_GL0160956;MH0247_GL0140818;MH0055_GL0060017;MH0224_GL0083316;MH0308_GL0027510;MH0031_…	Bacterial Non-GH Protein	6	6	5	6	3	3	3	4	3	3	2	3	0	0	0	1	1	1	1	1	0	0	0	0	65278000	36884000	0	23693000	0	0	0	0
sp|Q9UGM3|DMBT1_HUMAN;Q9UGM3	Other Human Protein	2	4	2	4	5	5	1	1	2	4	2	4	5	1	5	1	2	4	2	4	5	5	1	1	0	36750000	32462000	34516000	534530000	227380000	0	0
N085A_GL0032794	Bacterial Non-GH Protein	12	16	19	20	16	16	19	17	0	0	1	1	1	1	1	1	0	0	0	0	0	0	0	0	0	0	0	0	0	0	0	22588000
T2D-48A_GL0092646;N085A_GL0041498	Bacterial Non-GH Protein	0	0	0	0	0	0	1	2	0	0	0	0	0	0	0	1	0	0	0	0	0	0	0	1	0	0	0	0	0	0	0	11975000
T2D-105A_GL0119985;NOF010_GL0024477;N086A_GL0031918;MH0068_GL0022019;MH0435_GL0136625;MH0355_GL0001861;MH0070_GL0072312;MH0005_GL0007715;MH0108_GL0033589;NOF013_GL0009632;V1.UC57-0_GL0180295;T2D-63A_GL0011251;T2D-48A_GL0100452;O2.UC24-2_GL0131756;MH0381_GL0028310;MH0222_GL0065261;MH0125_GL0104517;MH0101_GL0004801;MH0093_GL0077233;MH0046_GL0031746;MH0020_GL0034345;MH0457_GL0137509;T2D-133A_GL00841…	Bacterial Non-GH Protein	3	2	5	5	3	3	7	4	0	0	1	1	0	1	1	1	0	0	0	0	0	0	0	0	0	0	0	0	0	0	0	1287300
N087A_GL0112129;MH0016_GL0072217;MH0006_GL0148386	Bacterial Non-GH Protein	10	9	9	12	3	7	11	12	1	0	0	2	0	2	0	2	0	0	0	0	0	0	0	0	0	0	0	0	0	0	0	16722000
T2D-105A_GL0117588;ED19A_GL0021068;T2D-135A_GL0058471;MH0058_GL0037933	Bacterial Non-GH Protein	4	3	2	3	1	1	2	2	4	3	2	3	1	2	1	2	1	1	0	1	0	0	0	0	80246000	36618000	50157000	60314000	0	0	26710000	25774000
MH0086_GL0119127	Glucosidase	1	21	0	21	0	16	0	14	0	1	0	2	0	0	2	0	0	1	0	2	0	2	0	0	0	36617000	0	6586700	0	0	0	0		Type 1
NLF014_GL0039242;O2.UC50-0_GL0275022	Bacterial Non-GH Protein	13	11	15	18	11	10	16	14	0	1	1	1	1	1	1	1	0	0	0	0	0	0	0	0	0	0	0	0	0	0	0	31672000
V1.UC22-1_GL0049161;V1.CD18-0_GL0078668;MH0305_GL0063695;MH0006_GL0064180	Bacterial Non-GH Protein	3	5	0	1	0	0	0	0	3	5	0	1	0	0	0	0	3	5	0	1	0	0	0	0	56074000	35268000	0	0	0	0	0	0
NLM003_GL0014164;T2D-135A_GL0080151	Bacterial Non-GH Protein	5	6	5	7	3	3	8	6	0	1	0	1	0	1	0	1	0	1	0	1	0	0	1	1	0	0	0	0	0	0	0	8723500
sp|P06312|KV401_HUMAN;P06312	Other Human Protein	4	4	4	4	4	4	3	3	4	4	4	4	4	3	4	3	4	4	4	4	4	4	3	3	59864000	34580000	90562000	90830000	51821000	51505000	29687000	35174000
T2D-135A_GL0085762;NOF013_GL0080170;NLM008_GL0007879;MH0020_GL0032279	Bacterial Non-GH Protein	3	3	6	8	2	2	7	10	0	0	0	0	0	0	0	1	0	0	0	0	0	0	0	0	0	0	0	0	0	0	0	22042000
658655.HMPREF0988_01270;ED12A_GL0043416	Glucuronidase	0	7	0	8	0	6	0	8	0	1	0	2	0	0	1	3	0	0	0	2	0	0	0	2	0	0	0	16739000	0	0	0	35818000	No loop
NLM017_GL0071276;MH0127_GL0048100	Bacterial Non-GH Protein	4	6	11	12	11	11	10	6	0	0	1	1	1	1	1	0	0	0	0	0	0	0	0	0	0	0	0	0	0	2409200	0	0
T2D-102A_GL0130490;NLM029_GL0061391	Bacterial Non-GH Protein	0	0	1	1	0	0	1	1	0	0	1	1	0	1	0	1	0	0	1	1	0	0	1	1	0	0	0	0	0	0	0	8553700
O2.UC27-1_GL0049257;O2.UC1-2_GL0081272;O2.UC48-0_GL0308404;NLM031_GL0047917	Bacterial Non-GH Protein	1	1	0	1	0	0	0	0	1	1	0	1	0	0	0	0	1	1	0	1	0	0	0	0	0	0	0	2213600	0	0	0	0
NOF007_GL0065773	Other Bacterial GH Protein	0	6	0	8	0	5	1	8	0	0	0	0	0	0	1	0	0	0	0	0	0	1	0	0	0	0	0	0	0	24118000	0	0
NOF013_GL0058763	Bacterial Non-GH Protein	6	6	5	5	4	3	6	6	1	1	1	0	1	1	0	1	0	0	0	0	0	0	0	0	0	0	0	0	0	0	0	40631000
sp|P40199|CEAM6_HUMAN;P40199	Other Human Protein	3	4	4	4	4	3	4	4	2	3	3	3	3	3	3	3	2	3	3	3	3	3	3	3	71614000	34403000	142930000	85514000	37190000	34082000	49160000	52827000
NOM002_GL0070408	Glucosidase	0	5	0	3	0	13	0	4	0	0	0	0	0	0	1	0	0	0	0	0	0	0	0	0	0	0	0	0	0	13705000	0	0		Type 1
NOM008_GL0005041	Bacterial Non-GH Protein	3	2	3	3	2	2	4	4	0	0	0	0	0	1	0	1	0	0	0	0	0	0	1	1	0	0	0	0	0	0	0	7103400
NOM009_GL0086915	Bacterial Non-GH Protein	6	7	5	6	2	4	3	3	0	1	0	1	0	0	0	0	0	1	0	1	0	0	0	0	0	0	0	942290	0	0	0	0
NOM014_GL0023636	Bacterial Non-GH Protein	8	7	7	6	1	2	9	10	2	1	2	3	0	3	0	4	0	0	0	0	0	0	0	1	23471000	0	31731000	45297000	0	0	29817000	56324000
NOM027_GL0048353;MH0421_GL0152628	Bacterial Non-GH Protein	0	0	3	4	1	1	0	0	0	0	3	4	1	0	1	0	0	0	3	4	1	1	0	0	0	0	12599000	13702000	0	0	0	0
sp|O00268|TAF4_HUMAN;O00268	Other Human Protein	1	1	0	0	1	0	0	0	1	1	0	0	1	0	0	0	1	1	0	0	1	0	0	0	0	0	0	0	2344900	0	0	0
sp|O00541|PESC_HUMAN;O00541	Other Human Protein	0	0	0	1	0	0	0	0	0	0	0	1	0	0	0	0	0	0	0	1	0	0	0	0	0	0	0	912830	0	0	0	0
sp|O00560|SDCB1_HUMAN;O00560	Other Human Protein	0	1	1	2	0	0	0	0	0	1	1	2	0	0	0	0	0	1	1	2	0	0	0	0	0	0	0	6263100	0	0	0	0
sp|O14493|CLD4_HUMAN;sp|O95484|CLD9_HUMAN;sp|P56747|CLD6_HUMAN;sp|O15551|CLD3_HUMAN;O14493;O95484;P56747;O15551	Other Human Protein	0	1	1	1	1	1	0	0	0	1	1	1	1	0	1	0	0	1	1	1	1	1	0	0	0	0	0	0	0	13556000	0	0
sp|O14863|ZNT4_HUMAN;O14863	Other Human Protein	0	1	0	0	0	1	1	1	0	1	0	0	0	1	1	1	0	1	0	0	0	1	1	1	0	0	0	0	0	0	0	18383000
sp|O14983|AT2A1_HUMAN;sp|P16615|AT2A2_HUMAN;O14983;P16615	Other Human Protein	0	1	0	1	0	0	1	1	0	1	0	1	0	1	0	1	0	1	0	1	0	0	1	1	0	0	0	0	0	0	0	62901000
sp|P08962|CD63_HUMAN;P08962	Other Human Protein	2	2	2	1	2	2	1	0	2	2	2	1	2	1	2	0	2	2	2	1	2	2	1	0	45246000	33562000	10039000	0	0	0	0	0
sp|O15455|TLR3_HUMAN;O15455	Other Human Protein	0	1	0	0	0	0	0	1	0	1	0	0	0	0	0	1	0	1	0	0	0	0	0	1	0	0	0	0	0	0	0	7319300
O2.CD1-0_GL0071396	Bacterial Non-GH Protein	2	1	4	4	1	2	1	0	1	0	1	1	0	0	1	0	1	0	1	1	0	1	0	0	0	0	0	0	0	1267500	0	0
O2.CD1-0_GL0094602	Bacterial Non-GH Protein	7	6	8	8	4	7	2	2	1	1	1	1	0	1	0	0	0	0	0	0	0	0	0	0	0	0	0	0	0	0	1415800	0
O2.CD3-0-PT_GL0000106	Bacterial Non-GH Protein	6	6	11	11	11	11	9	8	0	0	1	1	1	0	1	0	0	0	1	1	1	1	0	0	0	0	0	0	0	10848000	0	0
sp|P01619|KV320_HUMAN;P01619	Other Human Protein	2	2	2	3	2	3	2	3	2	2	2	3	2	2	3	3	1	1	2	2	1	2	1	2	67311000	32334000	0	234530000	105960000	190190000	82865000	64388000
O2.CD3-0-PT_GL0107955	Other Bacterial GH Protein	0	7	0	2	0	6	0	3	0	1	0	1	0	0	0	1	0	1	0	1	0	0	0	1	0	0	0	0	0	0	0	7065400
V1.FI05_GL0081193;O2.CD3-0-PT_GL0153670;MH0426_GL0006040;MH0054_GL0038658;MH0407_GL0213692;MH0329_GL0131607;V1.CD7-0_GL0017552;O2.UC7-0_GL0014944;DOM026_GL0040458;MH0124_GL0100684	Bacterial Non-GH Protein	6	7	7	8	5	6	4	5	0	1	1	2	0	0	0	0	0	1	1	2	0	0	0	0	0	0	0	12261000	0	0	0	0
O2.UC1-2_GL0099302;V1.FI10_GL0017188;MH0136_GL0080104;NLM021_GL0008302;MH0332_GL0053303;MH0069_GL0029854;N005A_GL0027104;MH0188_GL0158998;O2.UC11-0_GL0008495;T2D-189A_GL0039812;MH0413_GL0066655;T2D-207A_GL0074416;MH0092_GL0009174;NLM009_GL0007115	Bacterial Non-GH Protein	1	1	5	6	2	2	2	3	1	1	2	3	1	2	1	2	0	0	1	1	0	0	0	0	0	0	23218000	32801000	0	0	0	0
O2.UC13-2_GL0069734	Bacterial Non-GH Protein	0	0	1	1	1	0	1	1	0	0	1	1	1	1	0	1	0	0	1	1	1	0	1	1	0	0	0	0	0	0	0	2146700
MH0274_GL0008807;V1.CD40-0_GL0172501;O2.CD3-0-PT_GL0079212;MH0327_GL0034040;MH0096_GL0071850;MH0197_GL0150924;V1.UC52-0_GL0111040;V1.UC33-0_GL0040852	Bacterial Non-GH Protein	6	11	11	12	9	10	11	12	2	3	3	4	0	1	2	2	0	0	0	0	0	0	0	0	0	31669000	26148000	24402000	0	19974000	0	19483000
O2.UC15-1_GL0019701;V1.CD21-0_GL0013384;V1.UC55-0_GL0188058;V1.UC50-1_GL0076609;O2.UC20-1_GL0063107;MH0088_GL0019267	Bacterial Non-GH Protein	0	1	0	2	5	5	0	1	0	0	0	1	1	0	1	1	0	0	0	1	1	1	0	1	0	0	0	0	0	0	0	1341200
O2.UC15-1_GL0064800	Bacterial Non-GH Protein	3	4	4	5	4	4	5	5	0	1	1	1	1	1	1	1	0	1	1	1	1	1	1	1	0	0	0	0	0	0	0	7353200
O2.UC15-1_GL0123131	Bacterial Non-GH Protein	7	6	15	16	11	13	11	11	0	0	1	1	0	0	0	0	0	0	0	0	0	0	0	0	0	0	0	6791900	0	0	0	0
sp|P08861|CEL3B_HUMAN;P08861	Other Human Protein	6	6	10	10	10	10	11	12	4	4	8	8	8	9	8	9	4	4	8	8	8	8	9	9	41185000	31560000	632830000	965770000	865440000	667880000	1879000000	1139300000
O2.UC17-1_GL0099902;O2.UC40-0_GL0044906;O2.CD2-0_GL0022604	Bacterial Non-GH Protein	2	2	19	22	1	2	19	20	2	2	19	22	1	19	2	20	1	1	15	18	0	1	15	16	17238000	0	71901000	66192000	0	12553000	401470000	842840000
O2.UC2-2_GL0049109;O2.UC17-1_GL0135676;V1.UC52-1_GL0027950;V1.UC16-0_GL0048499;O2.UC27-0_GL0109125;MH0020_GL0035930;MH0131_GL0040021;MH0420_GL0031669	Bacterial Non-GH Protein	2	3	3	3	3	2	2	3	1	1	1	1	1	1	1	1	0	0	0	0	0	0	0	0	0	0	0	0	0	0	0	6572600
sp|Q9UKN1|MUC12_HUMAN;Q9UKN1	Other Human Protein	3	4	4	2	0	0	0	0	3	4	4	2	0	0	0	0	3	4	4	2	0	0	0	0	31603000	31202000	72369000	47796000	0	0	0	0
O2.UC19-1_GL0053446	Bacterial Non-GH Protein	5	5	10	10	8	10	9	9	0	0	0	0	0	1	0	0	0	0	0	0	0	0	1	0	0	0	0	0	0	0	1882300	0
MH0106_GL0010143	Glucuronidase	0	8	1	15	0	6	0	1	0	0	0	2	0	0	0	0	0	0	0	2	0	0	0	0	0	0	0	41775000	0	0	0	0	Mini-Loop 1
O2.UC19-2_GL0062932	Bacterial Non-GH Protein	4	4	4	4	4	4	5	5	0	0	0	0	0	1	0	1	0	0	0	0	0	0	1	1	0	0	0	0	0	0	0	11082000
O2.UC2-1_GL0129180	Glucosidase	0	8	0	9	0	10	0	11	0	0	0	0	0	0	0	1	0	0	0	0	0	0	0	1	0	0	0	0	0	0	0	2478700		Type 1
O2.UC21-1_GL0049687	Bacterial Non-GH Protein	1	2	2	2	1	1	2	3	0	1	0	0	0	0	0	1	0	1	0	0	0	0	0	1	0	0	0	0	0	0	0	679380000
O2.UC21-2_GL0027423;V1.CD46-0_GL0015724	Bacterial Non-GH Protein	0	1	1	1	2	2	0	1	0	0	0	1	0	0	0	0	0	0	0	1	0	0	0	0	0	0	0	3785000	0	0	0	0
N087A_GL0109978;MH0402_GL0221662;MH0095_GL0003306;MH0087_GL0045322;MH0016_GL0076265;MH0414_GL0117101;MH0093_GL0007842;T2D-113A_GL0007483;MH0381_GL0023806;MH0179_GL0038097;MH0106_GL0114806;DOM005_GL0007783;MH0056_GL0045902;T2D-22A_GL0070210;N085A_GL0051667;MH0198_GL0129747;MH0152_GL0012622;MH0011_GL0067009;MH0379_GL0152972;MH0101_GL0101334;MH0038_GL0041534;NOF010_GL0047542;MH0274_GL0130256;T2D-73A…	Bacterial Non-GH Protein	4	5	4	5	0	0	5	6	4	5	4	5	0	5	0	6	3	3	3	3	0	0	3	4	24334000	30211000	23963000	28955000	0	0	83718000	112860000
MH0122_GL0074085	Glucuronidase	0	5	0	11	0	9	0	1	0	0	0	0	0	0	2	0	0	0	0	0	0	0	0	0	0	0	0	0	0	75731000	0	0	Mini-Loop 1
O2.UC26-0_GL0079549	Other Bacterial GH Protein	0	0	0	3	0	3	0	5	0	0	0	3	0	0	3	5	0	0	0	2	0	2	0	4	0	0	0	14754000	0	15865000	0	114760000
O2.UC26-0_GL0080036	Other Bacterial GH Protein	1	1	0	4	0	3	0	14	1	0	0	3	0	0	3	13	1	0	0	3	0	3	0	13	0	0	0	2913500	0	5156300	0	242350000
O2.UC26-1_GL0038440;MH0299_GL0005464	Bacterial Non-GH Protein	14	12	9	11	8	7	10	12	1	1	0	0	0	0	0	1	1	1	0	0	0	0	0	1	0	0	0	0	0	0	0	2403300
sp|P98073|ENTK_HUMAN;P98073	Other Human Protein	6	5	9	8	7	7	4	5	6	5	9	8	7	4	7	5	6	5	9	8	7	7	4	5	57810000	29823000	73570000	61465000	85735000	101230000	35871000	37368000
O2.UC28-1_GL0019122	Unknown	0	0	1	2	0	0	2	2	0	0	0	1	0	1	0	1	0	0	0	1	0	0	1	1	0	0	0	0	0	0	0	7784400
O2.UC28-2_GL0191778	Bacterial Non-GH Protein	0	0	0	2	0	0	0	0	0	0	0	2	0	0	0	0	0	0	0	2	0	0	0	0	0	0	0	5430300	0	0	0	0
O2.UC29-1_GL0061036	Bacterial Non-GH Protein	0	0	0	0	0	0	3	3	0	0	0	0	0	3	0	3	0	0	0	0	0	0	3	3	0	0	0	0	0	0	111020000	107690000
O2.UC29-2_GL0108601	Bacterial Non-GH Protein	1	1	2	2	0	0	5	5	0	0	0	0	0	1	0	1	0	0	0	0	0	0	1	1	0	0	0	0	0	0	0	29492000
O2.UC30-1_GL0096915	Bacterial Non-GH Protein	0	0	1	1	0	0	0	0	0	0	1	1	0	0	0	0	0	0	1	1	0	0	0	0	0	0	0	5642900	0	0	0	0
MH0252_GL0193341;MH0012_GL0095889;MH0006_GL0100285;MH0457_GL0020778;MH0057_GL0014418	Bacterial Non-GH Protein	8	8	7	8	5	6	9	8	2	2	1	1	1	2	2	2	0	0	0	0	0	0	0	0	24274000	29765000	0	0	0	43145000	0	32516000
O2.UC31-0_GL0142426	Other Bacterial GH Protein	0	11	0	11	1	8	0	15	0	1	0	1	0	0	0	2	0	1	0	1	0	0	0	2	0	0	0	0	0	0	0	200140000
O2.UC32-1_GL0122392;MH0155_GL0051627;N087A_GL0008859	Bacterial Non-GH Protein	4	5	7	8	5	5	9	8	0	0	0	1	0	2	0	1	0	0	0	1	0	0	2	1	0	0	0	0	0	0	22031000	0
O2.UC32-1_GL0152846;MH0057_GL0040988	Bacterial Non-GH Protein	7	9	12	14	11	11	14	12	0	0	0	0	0	1	0	1	0	0	0	0	0	0	0	0	0	0	0	0	0	0	0	12238000
DOF010_GL0017831	Glucuronidase	0	1	1	2	1	1	0	1	0	0	0	1	0	0	0	0	0	0	0	1	0	0	0	0	0	0	0	789840	0	0	0	0	Loop 1
O2.UC36-0_GL0006966	Bacterial Non-GH Protein	9	9	9	13	3	7	11	12	0	0	0	1	0	0	0	1	0	0	0	1	0	0	0	1	0	0	0	0	0	0	0	7274100
O2.UC37-1_GL0058278;V1.CD52-0_GL0168048	Other Bacterial GH Protein	0	0	1	2	1	1	0	0	0	0	1	1	1	0	0	0	0	0	1	1	1	0	0	0	0	0	0	0	506980	0	0	0
MH0011_GL0063744;MH0385_GL0063465;T2D-133A_GL0085920;MH0137_GL0055968;MH0257_GL0143142;MH0421_GL0009204;T2D-112A_GL0010023;T2D-62A_GL0054127;MH0373_GL0188376	Bacterial Non-GH Protein	5	6	10	12	6	7	2	4	4	5	9	11	6	1	6	3	0	0	1	1	0	0	0	0	54419000	29395000	128480000	175050000	42251000	71130000	0	9324000
NLM005_GL0027231	Bacterial Non-GH Protein	1	2	2	2	0	0	2	2	1	2	2	2	0	2	0	2	1	1	1	1	0	0	1	1	0	29241000	27234000	18357000	0	0	25932000	24021000
O2.UC41-0_GL0133038;V1.CD52-0_GL0142102	Bacterial Non-GH Protein	0	0	2	4	0	0	0	0	0	0	2	4	0	0	0	0	0	0	1	1	0	0	0	0	0	0	36824000	22332000	0	0	0	0
O2.UC41-1_GL0100987	Bacterial Non-GH Protein	0	0	1	1	0	0	1	1	0	0	1	1	0	1	0	1	0	0	1	1	0	0	1	1	0	0	0	0	0	0	0	7129300
MH0361_GL0110335;MH0179_GL0026818;DOM005_GL0014566;DLM013_GL0013569;MH0062_GL0014111;MH0144_GL0037675	Bacterial Non-GH Protein	2	2	0	0	0	0	0	0	2	2	0	0	0	0	0	0	2	2	0	0	0	0	0	0	48203000	29238000	0	0	0	0	0	0
O2.UC43-2_GL0030526	Bacterial Non-GH Protein	0	0	2	4	0	0	0	0	0	0	2	4	0	0	0	0	0	0	1	2	0	0	0	0	0	0	21947000	33848000	0	0	0	0
MH0058_GL0059005;MH0321_GL0096992;MH0407_GL0077233	Bacterial Non-GH Protein	2	2	3	4	2	2	4	3	2	2	3	4	2	4	2	3	0	0	1	1	0	0	1	1	29308000	29043000	60570000	55106000	11402000	18304000	98851000	92788000
O2.UC46-1_GL0082851	Other Bacterial GH Protein	0	3	0	1	1	2	0	3	0	1	0	0	1	0	0	1	0	1	0	0	1	0	0	1	0	0	0	0	0	0	0	14422000
O2.UC46-1_GL0091470	Other Bacterial GH Protein	0	4	0	3	0	4	0	3	0	1	0	0	0	0	1	1	0	1	0	0	0	1	0	1	0	0	0	0	0	0	0	17756000
MH0129_GL0082798;MH0011_GL0076267;DOF008_GL0065902;MH0006_GL0083887;T2D-150A_GL0116009;MH0447_GL0189250;O2.UC48-0_GL0155094;MH0200_GL0063949;V1.UC5-3_GL0142474;MH0126_GL0012003;V1.UC58-4_GL0244465	Bacterial Non-GH Protein	6	6	7	5	5	5	6	5	2	2	3	2	1	2	1	1	0	0	0	0	0	0	0	0	71536000	28180000	16601000	13902000	0	0	21264000	0
O2.UC48-0_GL0113384	Bacterial Non-GH Protein	2	0	0	0	0	0	0	0	2	0	0	0	0	0	0	0	2	0	0	0	0	0	0	0	63970000	0	0	0	0	0	0	0
V1.CD3-0-PN_GL0048808;O2.UC48-0_GL0135226;V1.UC14-1_GL0007557;O2.UC49-0_GL0184470;V1.UC13-3_GL0064871;V1.UC11-5_GL0189749;V1.FI05_GL0068606;944560.HMPREF9058_2418;V1.FI28_GL0120270;N088A_GL0126753	Bacterial Non-GH Protein	2	0	1	1	0	0	0	0	2	0	1	1	0	0	0	0	2	0	1	1	0	0	0	0	4859400	0	0	0	0	0	0	0
MH0381_GL0039627;MH0222_GL0133650	Glucosidase	0	13	0	17	0	3	0	18	0	2	0	3	0	0	0	4	0	1	0	1	0	0	0	1	0	28104000	0	84375000	0	0	0	95927000		Type 2
MH0073_GL0029047;MH0220_GL0034388	Glucuronidase	0	8	1	16	0	8	0	1	0	8	1	16	0	0	8	1	0	0	0	1	0	0	0	0	0	27918000	0	1161700000	0	305870000	0	0	Mini-Loop 1
O2.UC5-1_GL0078163;T2D-112A_GL0011319;V1.CD20-0_GL0020091	Bacterial Non-GH Protein	7	7	6	6	7	6	7	7	1	1	0	0	1	1	0	1	0	0	0	0	0	0	0	0	0	0	0	0	0	0	0	29043000
V1.CD38-0_GL0131644;O2.UC52-0_GL0115105;T2D-135A_GL0016492	Bacterial Non-GH Protein	5	5	5	5	5	5	3	3	1	1	1	1	1	1	1	1	1	1	1	1	1	1	1	1	0	0	0	0	0	0	0	7944500
O2.UC57-0_GL0016379	Glucosidase	0	24	1	19	1	17	0	26	0	1	0	1	1	0	0	2	0	1	0	1	1	0	0	2	0	0	0	13941000	0	0	0	84565000		Type 2
O2.UC57-0_GL0066276	Other Bacterial GH Protein	1	13	0	14	0	6	0	15	0	1	0	0	0	0	0	1	0	1	0	0	0	0	0	1	0	0	0	0	0	0	0	18684000
O2.UC57-2_GL0097093	Bacterial Non-GH Protein	1	1	1	2	1	1	0	0	0	0	0	1	0	0	0	0	0	0	0	1	0	0	0	0	0	0	0	648690	0	0	0	0
O2.UC57-2_GL0134721	Bacterial Non-GH Protein	5	5	8	8	3	5	3	3	0	0	1	1	0	0	0	0	0	0	1	1	0	0	0	0	0	0	0	5460800	0	0	0	0
O2.UC7-0_GL0027861	Glucosidase	0	10	0	12	0	2	0	14	0	1	0	1	0	0	0	3	0	1	0	1	0	0	0	3	0	0	0	0	0	0	0	96871000		Type 2
sp|Q9UQQ1|NALDL_HUMAN;Q9UQQ1	Other Human Protein	2	5	4	5	5	5	2	4	2	5	4	5	5	2	5	4	2	5	4	5	5	5	2	4	19266000	27901000	23577000	19290000	42176000	53704000	17206000	14676000
O2.UC8-2_GL0201664;MH0302_GL0093322;V1.UC55-4_GL0130969;MH0379_GL0070721;MH0086_GL0044828;MH0246_GL0112802;MH0191_GL0191285;MH0003_GL0068907;N011A_GL0069416;MH0389_GL0025621;T2D-70A_GL0077696	Bacterial Non-GH Protein	2	2	2	2	1	2	1	0	1	1	1	1	0	1	1	0	1	1	1	1	0	1	1	0	0	0	0	0	0	9272200	0	0
MH0002_GL0076888;T2D-135A_GL0075837;MH0010_GL0001485;NOF013_GL0033841;MH0388_GL0035444	Unknown	4	2	8	13	1	4	16	18	4	2	8	13	1	16	4	18	2	0	3	9	0	1	10	13	28724000	27738000	63213000	49584000	0	22829000	186200000	282090000
sp|O43895|XPP2_HUMAN;O43895	Other Human Protein	0	0	0	3	2	3	0	3	0	0	0	3	2	0	3	3	0	0	0	3	2	3	0	3	0	0	0	1944000	15329000	21101000	0	2522300
sp|O60635|TSN1_HUMAN;O60635	Other Human Protein	1	1	1	1	0	1	0	0	1	1	1	1	0	0	1	0	1	1	1	1	0	1	0	0	0	0	0	46331000	0	0	0	0
sp|Q99880|H2B1L_HUMAN;sp|Q99879|H2B1M_HUMAN;sp|Q99877|H2B1N_HUMAN;sp|Q93079|H2B1H_HUMAN;sp|Q8N257|H2B3B_HUMAN;sp|Q5QNW6|H2B2F_HUMAN;sp|Q16778|H2B2E_HUMAN;sp|P62807|H2B1C_HUMAN;sp|P58876|H2B1D_HUMAN;sp|P57053|H2BFS_HUMAN;sp|P33778|H2B1B_HUMAN;sp|P23527|H2B1O_HUMAN;sp|P06899|H2B1J_HUMAN;sp|O60814|H2B1K_HUMAN;Q99880;Q99879;Q99877;Q93079;Q8N257;Q5QNW6;Q16778;P62807;P58876;P57053;P33778;P23527;P06899;…	Other Human Protein	0	0	0	0	0	0	1	0	0	0	0	0	0	1	0	0	0	0	0	0	0	0	1	0	0	0	0	0	0	0	3704100	0
MH0014_GL0052552	Other Bacterial GH Protein	0	15	0	11	0	13	0	15	0	2	0	2	0	0	2	2	0	2	0	2	0	2	0	2	0	27231000	0	14708000	0	19008000	0	114260000
sp|O75112|LDB3_HUMAN;O75112	Other Human Protein	0	0	1	0	0	0	0	0	0	0	1	0	0	0	0	0	0	0	1	0	0	0	0	0	0	0	4463800	0	0	0	0	0
sp|O94953|KDM4B_HUMAN;O94953	Other Human Protein	0	1	1	1	0	0	0	0	0	1	1	1	0	0	0	0	0	1	1	1	0	0	0	0	0	0	0	2902200	0	0	0	0
sp|O95497|VNN1_HUMAN;O95497	Other Human Protein	0	0	0	2	1	2	0	1	0	0	0	2	1	0	2	1	0	0	0	2	1	2	0	1	0	0	0	7040200	0	7197000	0	0
sp|P00441|SODC_HUMAN;P00441	Other Human Protein	2	1	2	2	2	2	2	2	2	1	2	2	2	2	2	2	2	1	2	2	2	2	2	2	55804000	0	115690000	161100000	237970000	204490000	59903000	67031000
sp|P00915|CAH1_HUMAN;P00915	Other Human Protein	2	0	1	1	2	2	2	2	2	0	1	1	2	2	2	2	2	0	1	1	2	2	2	2	0	0	0	0	16706000	11265000	0	0
sp|P01008|ANT3_HUMAN;P01008	Other Human Protein	2	1	1	0	1	1	1	1	2	1	1	0	1	1	1	1	2	1	1	0	1	1	1	1	4613800	0	0	0	0	0	0	0
CON__ENSEMBL:ENSP00000377550;sp|P13646|K1C13_HUMAN;CON__P13646-1;P13646	Contaminant - Keratin	8	8	6	7	3	6	3	3	3	3	2	3	0	0	3	0	0	0	0	0	0	0	0	0	59268000	27226000	69489000	16778000	0	16372000	0	0
sp|P01825|HV459_HUMAN;sp|A0A0C4DH41|HV461_HUMAN;A0A0C4DH41;sp|P06331|HV434_HUMAN;sp|P01824|HV439_HUMAN;P01825;P06331;P01824;sp|A0A075B6R2|HV404_HUMAN;A0A075B6R2	Other Human Protein	1	2	2	2	1	2	2	1	1	2	2	2	1	2	2	1	1	2	2	2	1	2	2	1	0	26020000	239050000	204900000	0	61599000	37345000	0
sp|P01040|CYTA_HUMAN;P01040	Other Human Protein	1	1	0	1	0	1	1	1	1	1	0	1	0	1	1	1	1	1	0	1	0	1	1	1	0	0	0	0	0	0	0	7469600
sp|Q9H3R2|MUC13_HUMAN;Q9H3R2	Other Human Protein	3	3	3	3	1	2	1	1	3	3	3	3	1	1	2	1	3	3	3	3	1	2	1	1	31375000	25992000	40830000	26951000	0	26008000	0	0
sp|P01594|KV133_HUMAN;sp|P01593|KVD33_HUMAN;P01594;P01593	Other Human Protein	1	1	1	1	1	1	1	1	1	1	1	1	1	1	1	1	1	1	1	1	1	1	1	1	0	0	0	0	0	0	0	9233200
sp|P01599|KV117_HUMAN;P01599	Other Human Protein	0	0	1	2	0	0	0	0	0	0	1	2	0	0	0	0	0	0	1	2	0	0	0	0	0	0	0	6507500	0	0	0	0
sp|P01602|KV105_HUMAN;P01602	Other Human Protein	0	1	1	1	0	0	0	1	0	1	1	1	0	0	0	1	0	1	1	1	0	0	0	1	0	0	0	0	0	0	0	4250000
CON__Q9QWL7;sp|Q04695|K1C17_HUMAN;CON__Q04695;Q04695	Contaminant - Keratin	4	8	5	6	3	4	6	7	0	2	0	1	0	0	0	1	0	2	0	1	0	0	0	1	0	25990000	0	0	0	0	0	0
sp|P01700|LV147_HUMAN;P01700	Other Human Protein	1	1	1	1	1	1	0	0	1	1	1	1	1	0	1	0	1	1	1	1	1	1	0	0	0	0	0	0	0	45656000	0	0
sp|P01701|LV151_HUMAN;P01701	Other Human Protein	0	0	1	1	1	0	1	1	0	0	1	1	1	1	0	1	0	0	1	1	1	0	1	1	0	0	0	0	0	0	0	3413800
sp|P01704|LV214_HUMAN;P01704	Other Human Protein	0	0	1	1	0	0	0	0	0	0	1	1	0	0	0	0	0	0	1	1	0	0	0	0	0	0	0	29741000	0	0	0	0
sp|P01709|LV208_HUMAN;P01709	Other Human Protein	0	0	1	1	1	1	0	1	0	0	1	1	1	0	1	1	0	0	1	1	1	1	0	1	0	0	0	0	0	0	0	3480800
sp|P01714|LV319_HUMAN;P01714	Other Human Protein	0	2	2	2	2	2	2	1	0	2	2	2	2	2	2	1	0	2	2	2	2	2	2	1	0	0	23872000	78038000	17739000	21427000	0	0
sp|P01742|HV169_HUMAN;P01742	Other Human Protein	0	0	1	1	0	0	0	1	0	0	1	1	0	0	0	1	0	0	1	1	0	0	0	1	0	0	0	0	0	0	0	8459100
sp|P01743|HV146_HUMAN;P01743	Other Human Protein	0	0	1	1	1	1	1	1	0	0	1	1	1	1	1	1	0	0	1	1	1	1	1	1	0	0	0	0	0	0	0	1684500
sp|P01768|HV330_HUMAN;sp|P01764|HV323_HUMAN;P01768;P01764	Other Human Protein	2	2	2	2	2	2	2	2	1	1	1	1	1	1	1	1	1	1	1	1	1	1	1	1	0	0	0	0	0	0	0	9561000
sp|P01766|HV313_HUMAN;P01766	Other Human Protein	2	2	1	2	2	1	1	1	1	1	0	1	1	0	0	0	1	1	0	1	1	0	0	0	0	0	0	0	2800400	0	0	0
sp|P48594|SPB4_HUMAN;sp|P29508|SPB3_HUMAN;P48594;P29508	Other Human Protein	4	3	3	3	0	1	2	2	4	3	3	3	0	2	1	2	4	3	3	3	0	1	2	2	29023000	25417000	15538000	18092000	0	0	11438000	13836000
sp|P01782|HV309_HUMAN;P01782	Other Human Protein	1	2	3	3	2	2	1	1	0	1	2	2	1	0	1	0	0	1	2	2	1	1	0	0	0	0	67386000	65761000	0	0	0	0
sp|P01814|HV270_HUMAN;P01814	Other Human Protein	0	0	1	1	0	0	0	0	0	0	1	1	0	0	0	0	0	0	1	1	0	0	0	0	0	0	0	6700500	0	0	0	0
sp|P01817|HV205_HUMAN;P01817	Other Human Protein	0	0	1	1	0	0	0	0	0	0	1	1	0	0	0	0	0	0	1	1	0	0	0	0	0	0	0	11565000	0	0	0	0
T2D-113A_GL0053366;N087A_GL0101755;MH0381_GL0101130;MH0016_GL0048906;T2D-177A_GL0050690;N085A_GL0016470;MH0267_GL0069301;MH0002_GL0045080;MH0108_GL0002266;DOM022_GL0078580;MH0004_GL0031269;MH0195_GL0099690;MH0040_GL0051080;DOM017_GL0060804;V1.UC26-4_GL0172664;MH0239_GL0070658;MH0012_GL0006019;MH0333_GL0057422;V1.UC52-1_GL0146416;MH0402_GL0036768;O2.UC24-2_GL0107305;N104A_GL0070941;V1.UC44-0_GL003…	Bacterial Non-GH Protein	3	4	1	4	0	0	4	5	3	4	1	4	0	4	0	5	3	4	1	4	0	0	4	5	23521000	25248000	0	16576000	0	0	19578000	40842000
MH0103_GL0079162;T2D-135A_GL0069398;MH0267_GL0049227;MH0206_GL0101823;MH0054_GL0032472;MH0003_GL0083599;NLM005_GL0060675;MH0388_GL0087572;T2D-105A_GL0105890;V1.UC41-0_GL0049345;MH0114_GL0024063;N066A_GL0034543;V1.UC35-0_GL0136112;T2D-135A_GL0108490;V1.CD38-0_GL0186910;MH0090_GL0111741;MH0246_GL0127810;MH0013_GL0036786;T2D-22A_GL0125371;MH0354_GL0113153;MH0189_GL0076502;MH0012_GL0145098;MH0009_GL0…	Bacterial Non-GH Protein	5	4	1	3	0	0	4	5	5	4	1	3	0	4	0	5	2	2	1	2	0	0	2	2	34079000	24717000	0	10514000	0	0	16032000	42926000
sp|P01857|IGHG1_HUMAN;P01857	Other Human Protein	2	2	2	3	2	2	1	1	1	1	1	2	1	1	1	1	1	1	1	1	1	1	1	1	0	0	0	144170000	0	0	0	0
NOF013_GL0073069;MH0002_GL0038002;T2D-109A_GL0052074;V1.CD38-0_GL0179700;T2D-73A_GL0034297;MH0239_GL0167473;MH0012_GL0013648;N089A_GL0098273;MH0155_GL0071147;O2.UC38-2_GL0043138;MH0325_GL0026081	Bacterial Non-GH Protein	4	4	2	4	0	0	4	4	4	4	2	4	0	4	0	4	1	1	0	1	0	0	1	1	24977000	24268000	17852000	15433000	0	0	26839000	30137000
MH0406_GL0089710	Other Bacterial GH Protein	0	9	0	4	0	4	0	8	0	3	0	1	0	0	1	1	0	3	0	1	0	1	0	1	0	23928000	0	0	0	0	0	0
DLM018_GL0068485	Bacterial Non-GH Protein	9	8	13	17	9	11	7	7	7	6	9	12	6	5	7	5	0	0	0	1	0	0	0	0	25988000	23701000	219400000	171600000	155700000	182190000	82220000	85309000
sp|P0CG06|LAC3_HUMAN;sp|P0CG05|LAC2_HUMAN;sp|P0CF74|LAC6_HUMAN;P0CG06;P0CG05;P0CF74;sp|A0M8Q6|LAC7_HUMAN;A0M8Q6	Other Human Protein	3	3	3	3	3	3	3	3	1	1	1	1	1	1	1	1	1	1	1	1	1	1	1	1	26844000	23637000	234810000	408230000	67328000	258360000	6600500	12682000
MH0010_GL0042018;MH0270_GL0132451;V1.CD30-0_GL0044089;MH0037_GL0028219;SZEY-09A_GL0045502;T2D-107A_GL0027584;NLF013_GL0058544;V1.CD20-4_GL0162056;O2.UC31-1_GL0059813;O2.UC26-1_GL0050709;O2.UC15-1_GL0109384;O2.UC12-1_GL0080717;O2.CD3-0-PT_GL0033039;MH0443_GL0031554;MH0071_GL0018976;MH0008_GL0036612;MH0001_GL0008388;O2.UC15-0_GL0031445;O2.UC17-2_GL0098591;MH0131_GL0041155;T2D-26A_GL0138148;O2.UC30-…	Bacterial Non-GH Protein	5	4	7	7	6	4	1	2	5	4	7	7	6	1	4	2	1	1	3	3	2	1	0	0	26772000	23369000	49010000	128150000	18638000	28970000	0	7355300
sp|P02794|FRIH_HUMAN;P02794	Other Human Protein	2	1	2	2	3	3	2	2	2	1	2	2	3	2	3	2	2	1	2	2	3	3	2	2	6361200	0	0	5879500	9164700	13267000	6614600	0
sp|P04040|CATA_HUMAN;P04040	Other Human Protein	0	0	0	0	0	0	2	0	0	0	0	0	0	2	0	0	0	0	0	0	0	0	2	0	0	0	0	0	0	0	42367000	0
sp|P04054|PA21B_HUMAN;P04054	Other Human Protein	1	1	2	2	3	2	3	1	1	1	2	2	3	3	2	1	1	1	2	2	3	2	3	1	0	0	47151000	58800000	31888000	21091000	247490000	0
sp|P04080|CYTB_HUMAN;P04080	Other Human Protein	1	0	0	1	0	0	0	0	1	0	0	1	0	0	0	0	1	0	0	1	0	0	0	0	0	0	0	1668800	0	0	0	0
sp|P04118|COL_HUMAN;P04118	Other Human Protein	1	1	2	1	2	2	1	1	1	1	2	1	2	1	2	1	1	1	2	1	2	2	1	1	0	0	6124200	0	57223000	0	0	0
sp|P04179|SODM_HUMAN;P04179	Other Human Protein	0	0	0	0	2	2	0	0	0	0	0	0	2	0	2	0	0	0	0	0	2	2	0	0	0	0	0	0	0	20089000	0	0
V1.FI24_GL0034549;MH0175_GL0101900	Bacterial Non-GH Protein	5	7	7	7	7	7	4	4	2	3	3	3	3	1	3	1	0	0	0	0	0	0	0	0	30642000	23232000	161250000	125580000	94983000	93401000	0	0
sp|P04279|SEMG1_HUMAN;P04279	Other Human Protein	1	0	2	17	0	0	1	1	1	0	2	17	0	1	0	1	1	0	2	14	0	0	1	1	0	0	1053200	823900000	0	0	0	0
O2.UC4-2_GL0000649;MH0239_GL0009354;O2.UC48-0_GL0268583;V1.UC50-1_GL0022416	Bacterial Non-GH Protein	3	2	3	2	3	3	3	3	3	2	3	2	3	3	3	3	2	1	2	2	2	2	2	2	24587000	23230000	12460000	15138000	28876000	36264000	39895000	33995000
sp|P09923|PPBI_HUMAN;P09923;sp|P05187|PPB1_HUMAN;P05187;sp|P10696|PPBN_HUMAN;P10696	Other Human Protein	6	5	14	16	10	9	12	14	6	5	14	16	10	12	9	14	6	5	14	16	10	9	12	14	19698000	22358000	400650000	567020000	229390000	299660000	218400000	379610000
MH0370_GL0085991	Bacterial Non-GH Protein	2	3	1	2	0	0	1	1	2	3	1	2	0	1	0	1	2	3	1	2	0	0	1	1	20796000	21843000	0	21425000	0	0	0	11713000
sp|Q15111|PLCL1_HUMAN;Q15111;sp|Q9UPR0|PLCL2_HUMAN;Q9UPR0	Other Human Protein	1	2	1	1	1	1	2	2	1	2	1	1	1	2	1	2	1	2	1	1	1	1	2	2	0	21651000	0	0	0	0	15708000	17742000
sp|P05166|PCCB_HUMAN;P05166	Other Human Protein	0	0	0	0	1	0	0	0	0	0	0	0	1	0	0	0	0	0	0	0	1	0	0	0	0	0	0	0	662660	0	0	0
sp|P05451|REG1A_HUMAN;P05451;sp|P48304|REG1B_HUMAN;P48304	Other Human Protein	0	0	2	3	0	0	1	1	0	0	2	3	0	1	0	1	0	0	2	3	0	0	1	1	0	0	120480000	83495000	0	0	0	0
T2D-68A_GL0058435;O2.UC24-2_GL0003856;MH0398_GL0211480;MH0185_GL0095373;MH0118_GL0104358;MH0052_GL0001104;DLM018_GL0002688;N009A_GL0016797;MH0189_GL0155846;MH0090_GL0058466	Bacterial Non-GH Protein	3	3	3	2	1	0	2	2	2	2	1	1	1	0	0	0	2	2	1	1	1	0	0	0	7188700	21628000	0	0	0	0	0	0
sp|O15273|TELT_HUMAN;O15273	Other Human Protein	1	2	0	2	0	1	0	1	1	2	0	2	0	0	1	1	1	2	0	2	0	1	0	1	0	21599000	0	4057300	0	0	0	0
V1.CD29-0_GL0134727;V1.CD3-0-PN_GL0096280;MH0239_GL0082759	Bacterial Non-GH Protein	4	3	2	7	4	5	3	4	4	3	2	7	4	3	5	4	4	3	2	7	4	5	3	4	34563000	21545000	23847000	24229000	42618000	43242000	35828000	52638000
sp|A0A0C4DH31|HV118_HUMAN;A0A0C4DH31;sp|P23083|HV102_HUMAN;P23083	Other Human Protein	1	2	2	2	2	2	1	1	1	2	2	2	2	1	2	1	1	2	2	2	2	2	1	1	0	21401000	50894000	101270000	25249000	28282000	0	0
sp|P06748|NPM_HUMAN;P06748	Other Human Protein	1	1	1	1	1	1	1	0	1	1	1	1	1	1	1	0	1	1	1	1	1	1	1	0	0	0	0	0	0	4862100	0	0
435590.BVU_0563;MH0434_GL0014125	Bacterial Non-GH Protein	3	7	3	7	1	1	12	13	3	7	3	7	1	12	1	13	3	7	3	7	1	1	12	13	18029000	20942000	13587000	13162000	0	0	81432000	124130000
sp|P07148|FABPL_HUMAN;P07148	Other Human Protein	0	1	1	0	1	1	0	0	0	1	1	0	1	0	1	0	0	1	1	0	1	1	0	0	0	0	0	0	0	7416800	0	0
sp|P07437|TBB5_HUMAN;sp|Q9BVA1|TBB2B_HUMAN;sp|Q13885|TBB2A_HUMAN;sp|P68371|TBB4B_HUMAN;P07437;Q9BVA1;Q13885;P68371	Other Human Protein	0	1	0	0	0	0	1	0	0	1	0	0	0	1	0	0	0	1	0	0	0	0	1	0	0	0	0	0	0	0	1321300	0
T2D-26A_GL0045760;MH0196_GL0176084	Glucosidase	1	6	1	7	1	4	1	7	0	1	0	0	0	0	0	0	0	1	0	0	0	0	0	0	0	20778000	0	0	0	0	0	0		Type 2
MH0003_GL0052996	Bacterial Non-GH Protein	4	5	2	6	0	1	6	10	4	5	2	6	0	6	1	10	4	5	2	6	0	1	6	10	15844000	20762000	45175000	9349500	0	0	41812000	66606000
MH0161_GL0030747	Glucuronidase	0	1	0	4	0	0	0	1	0	0	0	3	0	0	0	0	0	0	0	3	0	0	0	0	0	0	0	16654000	0	0	0	0	Mini-Loop 1
sp|P08238|HS90B_HUMAN;sp|P14625|ENPL_HUMAN;P08238;P14625	Other Human Protein	0	0	0	0	0	0	1	1	0	0	0	0	0	1	0	1	0	0	0	0	0	0	1	1	0	0	0	0	0	0	0	5218000
MH0288_GL0165765;MH0157_GL0012420;MH0022_GL0014169;MH0035_GL0031645;MH0437_GL0240936;MH0069_GL0045718;MH0169_GL0139913	Bacterial Non-GH Protein	6	6	5	6	1	2	2	2	2	2	1	2	0	0	0	0	0	0	0	0	0	0	0	0	0	20673000	0	26064000	0	0	0	0
MH0002_GL0028993;T2D-133A_GL0070709	Bacterial Non-GH Protein	3	4	0	0	0	0	3	4	3	4	0	0	0	3	0	4	3	4	0	0	0	0	3	4	19657000	20560000	0	0	0	0	13986000	21329000
MH0290_GL0142605	Bacterial Non-GH Protein	4	3	2	3	0	1	0	0	4	3	2	3	0	0	1	0	2	2	1	2	0	0	0	0	23467000	20419000	19702000	5951400	0	0	0	0
MH0407_GL0195768;V1.CD46-0_GL0017469	Bacterial Non-GH Protein	2	4	4	5	2	4	3	3	2	4	4	5	2	3	4	3	0	0	0	0	0	0	0	0	0	20397000	10553000	12147000	0	19133000	11365000	10921000
MH0381_GL0057347;MH0097_GL0030098;MH0101_GL0075281;MH0264_GL0088618;MH0037_GL0004997;MH0012_GL0132801;MH0427_GL0033674;O2.UC58-2_GL0112834;MH0415_GL0167118;MH0351_GL0110946;MH0407_GL0170503;O2.UC14-2_GL0042778	Bacterial Non-GH Protein	14	14	12	16	9	11	13	12	2	2	0	2	0	2	1	2	0	0	0	0	0	0	0	0	23703000	20207000	0	9969600	0	0	12170000	13229000
MH0012_GL0209171;T2D-135A_GL0101898;MH0012_GL0046318;MH0128_GL0026123;N009A_GL0068940;N013A_GL0060784	Bacterial Non-GH Protein	3	3	6	7	4	5	7	5	3	3	6	7	4	7	5	5	0	0	1	1	0	1	1	1	14111000	19781000	122090000	116190000	34089000	24409000	67856000	136430000
O2.CD3-0-PT_GL0059910;MH0211_GL0196112;MH0092_GL0135814;O2.UC57-0_GL0095295;N083A_GL0033089;O2.UC47-2_GL0002025;V1.CD48-0_GL0116666;O2.UC4-1_GL0149469;O2.UC50-2_GL0123432;O2.UC49-0_GL0169895;O2.UC30-1_GL0055187;MH0419_GL0197363;MH0087_GL0039082;MH0071_GL0045075;MH0116_GL0116313;N082A_GL0069551;V1.FI26_GL0230117;MH0286_GL0137885;MH0434_GL0152835;SZEY-30A_GL0040916;MH0204_GL0156789	Bacterial Non-GH Protein	3	3	4	5	3	4	5	4	2	2	2	2	2	2	2	2	1	1	1	1	1	1	1	1	20275000	19412000	20660000	62307000	27305000	18773000	18011000	19104000
sp|P10599|THIO_HUMAN;P10599	Other Human Protein	1	1	0	1	0	0	1	0	1	1	0	1	0	1	0	0	1	1	0	1	0	0	1	0	0	0	0	0	0	0	8756400	0
sp|P10809|CH60_HUMAN;P10809	Other Human Protein	0	0	0	0	0	0	1	0	0	0	0	0	0	1	0	0	0	0	0	0	0	0	1	0	0	0	0	0	0	0	707850	0
sp|P11055|MYH3_HUMAN;P11055	Other Human Protein	4	5	3	3	0	0	4	5	1	1	1	0	0	0	0	1	1	1	1	0	0	0	0	1	0	0	0	0	0	0	0	533410
sp|P11279|LAMP1_HUMAN;P11279	Other Human Protein	0	1	1	1	2	2	1	1	0	1	1	1	2	1	2	1	0	1	1	1	2	2	1	1	0	0	0	0	23746000	20800000	0	0
N085A_GL0024921	Glucosidase	0	12	1	10	0	11	0	11	0	1	0	0	0	0	0	0	0	0	0	0	0	0	0	0	0	19203000	0	0	0	0	0	0		Type 2
sp|A0A0B4J1V0|HV315_HUMAN;A0A0B4J1V0;sp|A0A0B4J1Y9|HV372_HUMAN;sp|A0A0B4J1V6|HV373_HUMAN;A0A0B4J1Y9;A0A0B4J1V6	Other Human Protein	2	3	3	3	3	3	3	3	2	3	3	3	3	3	3	3	2	3	3	3	3	3	3	3	23877000	19189000	294520000	279010000	53350000	55296000	56071000	38929000
BGI-33A_GL0016758	Bacterial Non-GH Protein	2	2	1	1	0	0	1	1	2	2	1	1	0	1	0	1	2	2	1	1	0	0	1	1	15841000	19179000	0	0	0	0	0	0
sp|P13473|LAMP2_HUMAN;P13473	Other Human Protein	1	1	1	1	1	1	1	1	1	1	1	1	1	1	1	1	1	1	1	1	1	1	1	1	0	0	0	0	0	0	0	5823600
V1.UC26-4_GL0006663	Bacterial Non-GH Protein	1	2	1	2	0	1	0	1	1	2	1	2	0	0	1	1	0	1	0	1	0	1	0	1	0	18926000	9511900	0	0	0	0	0
sp|P13688|CEAM1_HUMAN;P13688	Other Human Protein	2	2	2	2	1	1	1	1	1	1	1	1	0	0	0	0	1	1	1	1	0	0	0	0	0	0	0	5782300	0	0	0	0
MH0067_GL0022153;MH0415_GL0076256;T2D-134A_GL0073877;MH0179_GL0052311;MH0247_GL0027170;O2.UC48-1_GL0159108;T2D-22A_GL0025756;MH0066_GL0065947;MH0446_GL0204745	Bacterial Non-GH Protein	6	7	7	6	5	7	7	7	2	3	3	3	1	3	3	3	0	1	1	1	0	1	1	1	0	18877000	92295000	83653000	0	16824000	94090000	172520000
sp|P01859|IGHG2_HUMAN;sp|P01861|IGHG4_HUMAN;P01859;P01861	Other Human Protein	2	3	2	2	2	2	2	2	2	3	2	2	2	2	2	2	0	1	0	0	0	0	1	1	15953000	18801000	78967000	53411000	38089000	26722000	0	0
sp|Q9H190|SDCB2_HUMAN;Q9H190	Other Human Protein	3	3	3	3	1	2	0	0	3	3	3	3	1	0	2	0	3	3	3	3	1	2	0	0	13149000	18785000	34690000	26623000	0	11333000	0	0
MH0100_GL0059514;NOF005_GL0098607;T2D-33A_GL0004452;O2.UC4-2_GL0043382;DOM010_GL0038220;NLM023_GL0008939;T2D-140A_GL0050531;V1.CD25-4_GL0124078;MH0339_GL0088663;ED10A_GL0005892;DOF004_GL0026324	Bacterial Non-GH Protein	4	3	7	8	3	3	2	3	4	3	7	8	3	2	3	3	2	2	5	6	2	2	2	2	23633000	18438000	391530000	520190000	24623000	23756000	7098400	10810000
MH0133_GL0037821	Unknown	2	4	3	4	0	0	0	0	2	4	3	4	0	0	0	0	2	4	3	4	0	0	0	0	21351000	18257000	63761000	66597000	0	0	0	0
sp|P15882|CHIN_HUMAN;P15882	Other Human Protein	0	1	0	0	0	0	0	1	0	1	0	0	0	0	0	1	0	1	0	0	0	0	0	1	0	0	0	0	0	0	0	10373000
sp|P15924|DESP_HUMAN;P15924	Other Human Protein	3	2	2	3	2	0	4	1	3	2	2	3	2	4	0	1	3	2	2	3	2	0	4	1	6998700	0	0	4830400	0	0	4175800	0
sp|P15941|MUC1_HUMAN;P15941	Other Human Protein	2	1	2	2	1	1	0	0	2	1	2	2	1	0	1	0	2	1	2	2	1	1	0	0	10070000	0	18223000	0	0	0	0	0
V1.FI24_GL0171320;MH0377_GL0106168;MH0123_GL0020865;MH0322_GL0134344	Bacterial Non-GH Protein	4	4	9	11	8	10	3	3	4	4	9	11	8	3	10	3	0	2	4	5	4	6	0	1	19850000	18036000	111280000	125170000	42073000	63102000	7763000	6220400
sp|P19013|K2C4_HUMAN;CON__P19013;P19013	Contaminant - Keratin	5	5	5	6	5	4	2	2	3	3	3	3	2	0	2	0	2	2	2	2	1	1	0	0	24109000	17105000	37172000	13653000	8037400	10353000	0	0
MH0370_GL0042621;N085A_GL0065514;T2D-35A_GL0036820	Bacterial Non-GH Protein	4	5	0	1	0	0	4	4	4	5	0	1	0	4	0	4	4	5	0	1	0	0	4	4	30248000	17022000	0	0	0	0	13004000	16808000
sp|P84085|ARF5_HUMAN;sp|P18085|ARF4_HUMAN;sp|P84077|ARF1_HUMAN;sp|P61204|ARF3_HUMAN;P84085;P18085;P84077;P61204	Other Human Protein	0	1	0	1	0	0	0	1	0	1	0	1	0	0	0	1	0	1	0	1	0	0	0	1	0	0	0	0	0	0	0	2361000
sp|P19075|TSN8_HUMAN;P19075	Other Human Protein	1	1	1	1	1	1	1	1	1	1	1	1	1	1	1	1	1	1	1	1	1	1	1	1	0	0	0	0	0	0	0	4952900
V1.FI31_GL0028666;T2D-73A_GL0000732;O2.UC31-1_GL0133930	Bacterial Non-GH Protein	3	2	4	4	3	2	6	4	3	2	4	4	3	6	2	4	0	0	0	0	0	0	0	1	26704000	16600000	37129000	118280000	17093000	37515000	154640000	264230000
sp|P20929|NEBU_HUMAN;P20929	Other Human Protein	1	0	0	0	1	1	0	1	1	0	0	0	1	0	1	1	1	0	0	0	1	1	0	1	0	0	0	0	0	0	0	426130
sp|P20933|ASPG_HUMAN;P20933	Other Human Protein	0	0	0	1	1	0	1	0	0	0	0	1	1	1	0	0	0	0	0	1	1	0	1	0	0	0	0	0	0	0	10335000	0
sp|P21926|CD9_HUMAN;P21926	Other Human Protein	1	1	1	1	1	1	0	0	1	1	1	1	1	0	1	0	1	1	1	1	1	1	0	0	0	0	0	0	0	8226600	0	0
sp|P24539|AT5F1_HUMAN;P24539	Other Human Protein	0	0	0	0	0	1	0	0	0	0	0	0	0	0	1	0	0	0	0	0	0	1	0	0	0	0	0	0	0	0	0	0
sp|P24821|TENA_HUMAN;P24821	Other Human Protein	0	0	0	0	0	0	1	0	0	0	0	0	0	1	0	0	0	0	0	0	0	0	1	0	0	0	0	0	0	0	15989000	0
sp|P24855|DNAS1_HUMAN;P24855	Other Human Protein	1	0	0	1	0	2	0	0	1	0	0	1	0	0	2	0	1	0	0	1	0	2	0	0	0	0	0	0	0	34766000	0	0
sp|P25311|ZA2G_HUMAN;P25311	Other Human Protein	1	1	0	1	0	0	0	0	1	1	0	1	0	0	0	0	1	1	0	1	0	0	0	0	0	0	0	4370700	0	0	0	0
sp|P13533|MYH6_HUMAN;P13533;sp|P12883|MYH7_HUMAN;P12883;sp|Q9H6N6|MYH16_HUMAN;Q9H6N6	Other Human Protein	6	8	4	6	0	1	5	6	2	3	1	2	0	0	0	1	2	3	1	2	0	0	0	1	37431000	16559000	0	5361600	0	0	0	0
MH0253_GL0172427;MH0408_GL0263927	Bacterial Non-GH Protein	6	6	6	6	5	4	6	5	1	1	1	1	1	1	0	1	0	0	0	0	0	0	0	0	53951000	16471000	8077300	9291500	0	0	0	34085000
O2.UC48-1_GL0017143;MH0158_GL0052323;MH0452_GL0225946;537013.CLOSTMETH_02126;T2D-11A_GL0081890;MH0234_GL0024281;V1.UC58-4_GL0113166	Bacterial Non-GH Protein	2	3	4	3	4	3	5	4	1	2	1	1	2	1	1	1	0	0	0	0	0	0	0	0	0	16428000	0	0	38792000	0	0	0
sp|P28223|5HT2A_HUMAN;P28223	Other Human Protein	1	1	1	1	1	1	1	1	1	1	1	1	1	1	1	1	1	1	1	1	1	1	1	1	0	0	0	0	0	0	0	4097200000
MH0002_GL0074611;V1.UC47-4_GL0025067;O2.UC12-1_GL0069300;MH0288_GL0011442;MH0203_GL0098427;MH0443_GL0082139;T2D-31A_GL0046418;V1.CD3-0-PT_GL0077119;NLF002_GL0047876;V1.CD3-0-PN_GL0016979;V1.FI33_GL0110811;MH0221_GL0038625	Bacterial Non-GH Protein	3	4	4	4	3	2	2	1	3	4	4	4	3	2	2	1	0	1	1	1	1	1	0	0	38506000	16405000	47869000	30198000	8447100	9252700	4571900	0
sp|P30622|CLIP1_HUMAN;P30622	Other Human Protein	0	0	1	1	0	0	0	0	0	0	1	1	0	0	0	0	0	0	1	1	0	0	0	0	0	0	0	8953700	0	0	0	0
MH0153_GL0126914;V1.CD38-0_GL0138256;V1.UC11-5_GL0153845;NOM023_GL0032312;MH0267_GL0076519;O2.UC48-1_GL0014383;O2.UC56-0_GL0140560;DOF010_GL0027509;T2D-135A_GL0043893;MH0452_GL0228157	Bacterial Non-GH Protein	6	5	2	4	2	3	3	3	3	2	0	1	1	0	2	0	3	2	0	1	1	2	0	0	57393000	16380000	0	0	0	8843300	0	0
MH0014_GL0095925	Bacterial Non-GH Protein	5	6	15	17	13	14	9	10	2	3	10	12	9	5	9	5	0	0	0	0	0	0	0	0	14471000	16317000	98311000	197190000	135120000	104370000	66723000	77680000
sp|Q9Y243|AKT3_HUMAN;sp|P31749|AKT1_HUMAN;Q9Y243;P31749	Other Human Protein	1	1	1	1	1	1	1	1	1	1	1	1	1	1	1	1	1	1	1	1	1	1	1	1	0	0	0	0	0	0	0	143220000
sp|P31944|CASPE_HUMAN;P31944	Other Human Protein	1	1	0	1	1	0	1	1	1	1	0	1	1	1	0	1	1	1	0	1	1	0	1	1	0	0	0	0	0	0	0	1289800
sp|P32455|GBP1_HUMAN;P32455	Other Human Protein	1	1	1	1	1	1	0	1	1	1	1	1	1	0	1	1	1	1	1	1	1	1	0	1	0	0	0	0	0	0	0	32322000
sp|P35030|TRY3_HUMAN;P35030	Other Human Protein	3	3	2	3	3	3	3	3	1	1	0	1	1	1	1	1	1	1	0	1	1	1	1	1	0	0	0	0	0	0	0	30352000
sp|Q9UI47|CTNA3_HUMAN;sp|P35221|CTNA1_HUMAN;Q9UI47;P35221	Other Human Protein	0	0	0	0	0	1	0	1	0	0	0	0	0	0	1	1	0	0	0	0	0	1	0	1	0	0	0	0	0	0	0	4597000
MH0014_GL0112152;MH0274_GL0068730	Bacterial Non-GH Protein	0	3	0	6	0	19	0	1	0	3	0	6	0	0	19	1	0	3	0	6	0	19	0	1	0	16186000	0	23109000	0	569950000	0	0
sp|P35244|RFA3_HUMAN;P35244	Other Human Protein	1	0	0	0	0	0	0	0	1	0	0	0	0	0	0	0	1	0	0	0	0	0	0	0	5831900	0	0	0	0	0	0	0
MH0026_GL0024394;MH0177_GL0036569;MH0128_GL0018799;N085A_GL0082944;O2.UC57-0_GL0055201;MH0264_GL0092864;T2D-110A_GL0011466;MH0407_GL0210566;T2D-22A_GL0107111;MH0192_GL0118984;V1.CD15-3_GL0143207;MH0274_GL0179642;MH0239_GL0010550;MH0091_GL0100229;MH0314_GL0031114;MH0243_GL0078503;MH0204_GL0222666;MH0281_GL0104955;MH0140_GL0061404;MH0135_GL0074436;MH0057_GL0022099;MH0054_GL0063265;MH0012_GL0027870;…	Bacterial Non-GH Protein	5	2	5	8	1	1	7	7	5	2	5	8	1	7	1	7	0	0	0	0	0	0	0	0	12735000	16138000	11170000	30263000	0	0	47758000	44363000
sp|P38646|GRP75_HUMAN;P38646	Other Human Protein	0	0	0	0	1	1	0	1	0	0	0	0	1	0	1	1	0	0	0	0	1	1	0	1	0	0	0	0	0	0	0	4038500
V1.FI17_GL0189698	Bacterial Non-GH Protein	2	2	3	3	2	1	1	0	1	2	3	3	2	1	1	0	0	1	1	1	1	0	1	0	0	15012000	110270000	64431000	44969000	0	0	0
sp|P40763|STAT3_HUMAN;P40763	Other Human Protein	0	0	0	0	1	1	0	0	0	0	0	0	1	0	1	0	0	0	0	0	1	1	0	0	0	0	0	0	0	35294000	0	0
sp|P40818|UBP8_HUMAN;P40818	Other Human Protein	0	0	0	1	0	0	0	0	0	0	0	1	0	0	0	0	0	0	0	1	0	0	0	0	0	0	0	101160000	0	0	0	0
sp|Q53GD3|CTL4_HUMAN;Q53GD3	Other Human Protein	4	4	4	4	2	3	1	1	4	4	4	4	2	1	3	1	4	4	4	4	2	3	1	1	9550700	14844000	41693000	31927000	9103600	14304000	0	0
sp|P47893|OR3A2_HUMAN;sp|P47888|OR3A3_HUMAN;P47893;P47888	Other Human Protein	1	1	1	1	1	1	1	1	1	1	1	1	1	1	1	1	1	1	1	1	1	1	1	1	0	0	0	0	0	0	0	187530000
sp|P48047|ATPO_HUMAN;P48047	Other Human Protein	0	1	0	1	0	1	0	0	0	1	0	1	0	0	1	0	0	1	0	1	0	1	0	0	0	0	0	0	0	2718400	0	0
sp|P48052|CBPA2_HUMAN;P48052	Other Human Protein	1	1	0	0	1	1	0	0	1	1	0	0	1	0	1	0	1	1	0	0	1	1	0	0	0	0	0	0	0	2684800	0	0
MH0203_GL0229393;N056A_GL0030416;O2.UC15-0_GL0032178;V1.UC11-5_GL0071633;MH0330_GL0001729;T2D-45A_GL0108670;V1.UC5-3_GL0104900;MH0298_GL0091276;O2.UC41-0_GL0123359;DLM010_GL0055996;V1.CD37-4_GL0115906	Bacterial Non-GH Protein	7	9	9	12	9	10	10	9	2	3	2	3	2	2	2	1	0	0	0	0	0	0	0	0	4461600	14626000	9565200	13727000	5046600	20630000	5878600	0
sp|P51608|MECP2_HUMAN;P51608	Other Human Protein	1	1	0	0	1	0	0	0	1	1	0	0	1	0	0	0	1	1	0	0	1	0	0	0	0	0	0	0	1711300	0	0	0
sp|Q13133|NR1H3_HUMAN;sp|P55055|NR1H2_HUMAN;Q13133;P55055	Other Human Protein	0	1	0	1	0	0	0	1	0	1	0	1	0	0	0	1	0	1	0	1	0	0	0	1	0	0	0	0	0	0	0	20020000
V1.CD14-0_GL0091287;O2.UC14-2_GL0147652;O2.UC22-0_GL0049911;MH0040_GL0007968	Bacterial Non-GH Protein	4	5	9	9	0	0	0	1	4	5	9	9	0	0	0	1	4	5	9	9	0	0	0	1	16498000	14552000	332020000	414550000	0	0	0	0
sp|P56470|LEG4_HUMAN;P56470	Other Human Protein	1	1	1	1	1	1	1	1	1	1	1	1	1	1	1	1	1	1	1	1	1	1	1	1	0	0	0	0	0	0	0	3875500
V1.UC5-0_GL0043555	Bacterial Non-GH Protein	2	2	3	5	1	2	5	6	2	2	3	5	1	5	2	6	0	0	0	0	0	0	0	1	12304000	14534000	17243000	19832000	0	0	32164000	124110000
sp|P60174|TPIS_HUMAN;P60174	Other Human Protein	1	0	0	0	0	0	0	0	1	0	0	0	0	0	0	0	1	0	0	0	0	0	0	0	7978600	0	0	0	0	0	0	0
V1.FI13_GL0100159;V1.CD21-0_GL0063243;V1.CD32-0_GL0117227	Bacterial Non-GH Protein	5	4	2	2	1	0	4	3	3	3	0	0	0	2	0	2	3	3	0	0	0	0	2	2	19477000	14407000	0	0	0	0	10831000	18862000
sp|P61626|LYSC_HUMAN;P61626	Other Human Protein	1	1	1	1	1	0	0	1	1	1	1	1	1	0	0	1	1	1	1	1	1	0	0	1	0	0	0	0	0	0	0	7300000
sp|P61966|AP1S1_HUMAN;P61966	Other Human Protein	0	0	1	1	0	1	1	1	0	0	1	1	0	1	1	1	0	0	1	1	0	1	1	1	0	0	0	0	0	0	0	3096400
sp|P62328|TYB4_HUMAN;P62328	Other Human Protein	0	0	0	0	0	0	1	0	0	0	0	0	0	1	0	0	0	0	0	0	0	0	1	0	0	0	0	0	0	0	0	0
sp|P63267|ACTH_HUMAN;sp|P68133|ACTS_HUMAN;sp|P68032|ACTC_HUMAN;sp|P62736|ACTA_HUMAN;P63267;P68133;P68032;P62736	Other Human Protein	6	6	4	5	2	1	5	3	1	1	1	1	0	1	0	1	1	1	1	1	0	0	1	1	0	0	0	0	0	0	0	48477000
742723.HMPREF9477_00804;MH0239_GL0125431;MH0101_GL0034643;O2.CD2-0-PT_GL0067536;V1.UC13-3_GL0049049;O2.UC11-2_GL0002206;V1.UC35-4_GL0018000	Bacterial Non-GH Protein	6	5	5	6	5	5	7	6	1	2	1	1	0	2	1	2	0	0	0	0	0	0	0	0	0	14341000	0	0	0	0	0	39703000
sp|Q6NXT2|H3C_HUMAN;sp|Q71DI3|H32_HUMAN;sp|Q16695|H31T_HUMAN;sp|P84243|H33_HUMAN;sp|P68431|H31_HUMAN;Q6NXT2;Q71DI3;Q16695;P84243;P68431	Other Human Protein	1	1	1	1	1	0	1	1	1	1	1	1	1	1	0	1	1	1	1	1	1	0	1	1	0	0	0	0	0	0	0	11824000
sp|A0A0C4DH38|HV551_HUMAN;A0A0C4DH38	Other Human Protein	1	2	3	3	2	3	1	1	1	2	3	3	2	1	3	1	1	2	3	3	2	3	1	1	0	14259000	40375000	51218000	26483000	32266000	0	0
sp|P78310|CXAR_HUMAN;P78310	Other Human Protein	1	0	1	2	1	1	0	0	1	0	1	2	1	0	1	0	1	0	1	2	1	1	0	0	0	0	0	2888600	0	0	0	0
MH0086_GL0085334	Glucosidase	0	4	0	4	0	4	0	1	0	2	0	2	0	0	2	0	0	1	0	1	0	1	0	0	0	14209000	0	0	0	25105000	0	0		Type 1
sp|P80748|LV321_HUMAN;P80748	Other Human Protein	0	1	3	3	2	1	0	0	0	1	3	3	2	0	1	0	0	1	3	3	2	1	0	0	0	0	24059000	23250000	0	0	0	0
sp|P81605|DCD_HUMAN;P81605	Other Human Protein	2	1	2	2	2	2	2	2	2	1	2	2	2	2	2	2	2	1	2	2	2	2	2	2	45817000	0	33596000	32805000	27973000	23066000	41781000	33841000
N009A_GL0012129;T2D-135A_GL0099393;MH0298_GL0176223;N085A_GL0082228;MH0057_GL0044056;MH0102_GL0044951;MH0192_GL0066494;N006A_GL0003440;MH0105_GL0002387;MH0076_GL0012504;MH0003_GL0003989;MH0368_GL0091325;V1.UC41-0_GL0056247;MH0435_GL0158724;MH0314_GL0169036;MH0243_GL0033203;MH0069_GL0005868;MH0014_GL0002275;O2.UC40-2_GL0097842;MH0025_GL0070476;MH0407_GL0011672;MH0281_GL0123508;MH0265_GL0054720;MH0…	Bacterial Non-GH Protein	2	5	14	17	10	10	15	15	2	5	14	17	10	15	10	15	1	2	6	7	3	3	6	6	8991800	14204000	212110000	309770000	70746000	89835000	318070000	484750000
MH0006_GL0031858;V1.UC7-0_GL0007679;MH0243_GL0059551;MH0014_GL0035301;O2.UC1-1_GL0093610;MH0003_GL0076051;MH0415_GL0212493;MH0126_GL0025406;MH0238_GL0130999;V1.UC54-0_GL0210550	Bacterial Non-GH Protein	3	4	6	10	2	4	8	11	2	3	5	9	2	7	3	10	0	0	0	0	0	0	0	0	5580600	13903000	16453000	73101000	3295800	9736800	36305000	165690000
sp|Q01523|DEF5_HUMAN;Q01523	Other Human Protein	1	1	1	0	1	1	1	1	1	1	1	0	1	1	1	1	1	1	1	0	1	1	1	1	0	0	0	0	0	0	0	4522600
sp|Q02383|SEMG2_HUMAN;Q02383	Other Human Protein	0	0	0	13	0	0	0	0	0	0	0	10	0	0	0	0	0	0	0	10	0	0	0	0	0	0	0	199190000	0	0	0	0
sp|P31151|S10A7_HUMAN;P31151;sp|Q86SG5|S1A7A_HUMAN;Q86SG5	Other Human Protein	2	2	2	2	1	2	1	2	2	2	2	2	1	1	2	2	2	2	2	2	1	2	1	2	55396000	13860000	12530000	9317600	0	6700400	0	8454900
MH0087_GL0040866;V1.UC12-4_GL0031595;MH0192_GL0161359;MH0340_GL0003244	Bacterial Non-GH Protein	3	4	7	7	6	6	6	8	3	4	7	7	6	6	6	8	3	4	7	7	6	6	6	8	20395000	13694000	40511000	46643000	46677000	44085000	34331000	64927000
sp|Q03154|ACY1_HUMAN;Q03154	Other Human Protein	1	1	2	0	4	7	1	1	1	1	2	0	4	1	7	1	1	1	2	0	4	7	1	1	0	0	7650800	0	53867000	30520000	0	0
sp|Q03403|TFF2_HUMAN;Q03403	Other Human Protein	1	0	1	1	1	1	0	0	1	0	1	1	1	0	1	0	1	0	1	1	1	1	0	0	0	0	0	0	0	2308200	0	0
sp|Q07654|TFF3_HUMAN;Q07654	Other Human Protein	1	1	1	1	1	1	0	0	1	1	1	1	1	0	1	0	1	1	1	1	1	1	0	0	0	0	0	0	0	10576000	0	0
MH0168_GL0025519;MH0110_GL0028400;T2D-142A_GL0049594;NLM022_GL0033747	Bacterial Non-GH Protein	2	1	0	0	1	1	0	0	2	1	0	0	1	0	1	0	2	1	0	0	1	1	0	0	70335000	13294000	0	0	27278000	16405000	0	0
sp|Q08499|PDE4D_HUMAN;Q08499	Other Human Protein	1	1	0	1	0	1	0	0	1	1	0	1	0	0	1	0	1	1	0	1	0	1	0	0	0	0	0	1457500	0	0	0	0
sp|Q08554|DSC1_HUMAN;Q08554	Other Human Protein	0	0	0	0	0	0	1	0	0	0	0	0	0	1	0	0	0	0	0	0	0	0	1	0	0	0	0	0	0	0	0	0
sp|Q12864|CAD17_HUMAN;Q12864	Other Human Protein	1	1	1	1	1	1	0	0	1	1	1	1	1	0	1	0	1	1	1	1	1	1	0	0	0	0	0	0	0	42674000	0	0
N085A_GL0023957;MH0381_GL0180231;MH0113_GL0029589;MH0028_GL0067833;T2D-51A_GL0036069;MH0407_GL0130360;MH0290_GL0028061;MH0274_GL0164127;MH0149_GL0136555;MH0106_GL0028916;MH0101_GL0005706;N085A_GL0055680;MH0265_GL0041981;MH0337_GL0073775;O2.UC9-0_GL0066638;T2D-8A_GL0071665;DOM019_GL0095683;N088A_GL0077449;MH0323_GL0167955;T2D-105A_GL0036034;O2.UC57-2_GL0128988;T2D-135A_GL0042099;MH0267_GL0153097;M…	Bacterial Non-GH Protein	1	2	2	3	1	2	3	3	1	2	2	3	1	3	2	3	0	1	1	1	0	1	1	1	0	13287000	25895000	69056000	0	13490000	30336000	45501000
sp|P68871|HBB_HUMAN;P68871;CON__P02070;sp|P69892|HBG2_HUMAN;sp|P69891|HBG1_HUMAN;sp|P02100|HBE_HUMAN;sp|P02042|HBD_HUMAN;CON__Q3SX09;P69892;P69891;P02100;P02042	Contaminant - Other	2	2	0	2	0	0	1	0	2	2	0	2	0	1	0	0	2	2	0	2	0	0	1	0	11520000	13247000	0	0	0	0	0	0
sp|Q14188|TFDP2_HUMAN;Q14188	Other Human Protein	1	1	1	1	1	1	1	1	1	1	1	1	1	1	1	1	1	1	1	1	1	1	1	1	0	0	0	0	0	0	0	407630000
sp|Q14315|FLNC_HUMAN;Q14315;sp|P21333|FLNA_HUMAN;P21333	Other Human Protein	1	1	1	1	1	3	4	4	1	1	1	1	1	4	3	4	1	1	1	1	1	3	4	4	0	0	0	0	0	13898000	29572000	46046000
sp|Q14508|WFDC2_HUMAN;Q14508	Other Human Protein	0	1	0	0	1	1	0	0	0	1	0	0	1	0	1	0	0	1	0	0	1	1	0	0	0	0	0	0	0	1129200	0	0
sp|Q14CN2|CLCA4_HUMAN;Q14CN2	Other Human Protein	3	2	2	1	3	2	0	0	2	1	2	1	2	0	1	0	2	1	2	1	2	1	0	0	10913000	0	3263600	0	4517000	0	0	0
sp|Q8WWA0|ITLN1_HUMAN;Q8WWA0;sp|Q8WWU7|ITLN2_HUMAN;Q8WWU7	Other Human Protein	3	2	3	4	2	1	3	4	3	2	3	4	2	3	1	4	3	2	3	4	2	1	3	4	29338000	12925000	12809000	36312000	13968000	0	24468000	34377000
sp|Q15399|TLR1_HUMAN;sp|Q9Y2C9|TLR6_HUMAN;Q15399;Q9Y2C9	Other Human Protein	1	1	1	1	1	1	1	1	1	1	1	1	1	1	1	1	1	1	1	1	1	1	1	1	0	0	0	0	0	0	0	232160000
sp|Q5D862|FILA2_HUMAN;CON__Q5D862;Q5D862	Contaminant - Other	2	3	1	3	0	0	3	1	2	3	1	3	0	3	0	1	2	3	1	3	0	0	3	1	16450000	12923000	0	8019700	0	0	26897000	0
MH0154_GL0028983;V1.CD21-0_GL0020607;V1.UC38-4_GL0116890;V1.FI18_GL0037529	Bacterial Non-GH Protein	1	3	4	5	1	4	0	1	1	3	4	5	1	0	4	1	1	3	4	5	1	4	0	1	0	12688000	69337000	68477000	0	19572000	0	0
sp|Q2KHR3|QSER1_HUMAN;Q2KHR3	Other Human Protein	1	1	1	1	1	1	1	1	1	1	1	1	1	1	1	1	1	1	1	1	1	1	1	1	0	0	0	0	0	0	0	58006000
V1.UC54-0_GL0078471;O2.UC46-1_GL0016162;O2.UC48-0_GL0287867	Bacterial Non-GH Protein	3	4	1	1	1	0	1	2	3	4	1	1	1	1	0	2	3	4	1	1	1	0	1	2	49606000	12368000	0	0	0	0	0	7014500
sp|Q562R1|ACTBL_HUMAN;Q562R1	Other Human Protein	2	3	2	3	1	1	2	1	0	1	1	1	0	1	0	0	0	1	1	1	0	0	1	0	0	0	0	0	0	0	16768000	0
sp|Q5T2N8|ATD3C_HUMAN;sp|Q5T9A4|ATD3B_HUMAN;Q5T2N8;Q5T9A4	Other Human Protein	1	1	1	1	1	1	1	1	1	1	1	1	1	1	1	1	1	1	1	1	1	1	1	1	0	0	0	0	0	0	0	9707300
sp|Q5T7N2|LITD1_HUMAN;Q5T7N2	Other Human Protein	1	1	1	1	1	1	1	1	1	1	1	1	1	1	1	1	1	1	1	1	1	1	1	1	0	0	0	0	0	0	0	12019000
sp|Q5VUG0|SMBT2_HUMAN;Q5VUG0	Other Human Protein	0	0	0	1	0	0	1	0	0	0	0	1	0	1	0	0	0	0	0	1	0	0	1	0	0	0	0	0	0	0	0	0
MH0288_GL0054326;V1.CD3-0_GL0011621	Bacterial Non-GH Protein	2	4	1	1	0	0	5	8	2	4	1	1	0	5	0	8	2	4	1	1	0	0	5	8	11188000	12331000	0	0	0	0	18764000	57073000
sp|Q64LD2|WDR25_HUMAN;Q64LD2	Other Human Protein	1	1	1	1	1	1	1	1	1	1	1	1	1	1	1	1	1	1	1	1	1	1	1	1	0	0	0	0	0	0	0	49246000
sp|Q68DE3|USF3_HUMAN;Q68DE3	Other Human Protein	0	0	1	0	1	1	1	0	0	0	1	0	1	1	1	0	0	0	1	0	1	1	1	0	0	0	0	0	0	5657400	0	0
sp|Q68E01|INT3_HUMAN;Q68E01	Other Human Protein	1	1	1	1	1	1	1	1	1	1	1	1	1	1	1	1	1	1	1	1	1	1	1	1	0	0	0	0	0	0	0	155910000
sp|Q6GPI1|CTRB2_HUMAN;Q6GPI1;sp|P17538|CTRB1_HUMAN;P17538	Other Human Protein	3	1	2	3	3	3	3	4	3	1	2	3	3	3	3	4	3	1	2	3	3	3	3	4	9982400	0	8204100	5855800	18864000	30309000	36056000	18529000
sp|Q6GTS8|P20D1_HUMAN;Q6GTS8	Other Human Protein	0	1	0	1	0	0	0	0	0	1	0	1	0	0	0	0	0	1	0	1	0	0	0	0	0	0	0	565510	0	0	0	0
sp|Q6IA69|NADE_HUMAN;Q6IA69	Other Human Protein	1	1	1	1	1	1	1	1	1	1	1	1	1	1	1	1	1	1	1	1	1	1	1	1	0	0	0	0	0	0	0	12988000
sp|Q6IWH7|ANO7_HUMAN;Q6IWH7	Other Human Protein	1	1	1	1	1	1	1	1	1	1	1	1	1	1	1	1	1	1	1	1	1	1	1	1	0	0	0	0	0	0	0	62781000
sp|Q6P587|FAHD1_HUMAN;Q6P587	Other Human Protein	0	0	0	1	0	1	0	0	0	0	0	1	0	0	1	0	0	0	0	1	0	1	0	0	0	0	0	2064500	0	0	0	0
sp|Q6TDP4|KLH17_HUMAN;Q6TDP4	Other Human Protein	1	1	1	1	1	1	1	1	1	1	1	1	1	1	1	1	1	1	1	1	1	1	1	1	0	0	0	0	0	0	0	39758000
sp|Q6UWV6|ENPP7_HUMAN;Q6UWV6	Other Human Protein	0	1	1	1	1	1	0	1	0	1	1	1	1	0	1	1	0	1	1	1	1	1	0	1	0	0	0	0	0	0	0	3914600
sp|Q6UX06|OLFM4_HUMAN;Q6UX06	Other Human Protein	2	2	3	4	2	1	0	2	2	2	3	4	2	0	1	2	2	2	3	4	2	1	0	2	0	0	0	20675000	0	0	0	0
sp|Q6ZMU1|C3P1_HUMAN;Q6ZMU1	Other Human Protein	1	1	1	1	1	1	1	1	1	1	1	1	1	1	1	1	1	1	1	1	1	1	1	1	0	0	0	0	0	0	0	13525000
V1.CD32-0_GL0049619	Bacterial Non-GH Protein	0	3	1	12	1	2	0	26	0	3	1	11	1	0	2	25	0	1	0	3	0	0	0	6	0	11675000	0	20843000	0	5448000	0	3773700000
sp|Q6ZQQ6|WDR87_HUMAN;Q6ZQQ6	Other Human Protein	0	0	0	1	0	0	0	0	0	0	0	1	0	0	0	0	0	0	0	1	0	0	0	0	0	0	0	2575300	0	0	0	0
sp|Q7Z6J2|GRASP_HUMAN;Q7Z6J2	Other Human Protein	1	1	1	1	0	1	0	0	1	1	1	1	0	0	1	0	1	1	1	1	0	1	0	0	0	0	0	0	0	717430	0	0
sp|Q86TI0|TBCD1_HUMAN;Q86TI0	Other Human Protein	0	0	0	0	0	0	1	1	0	0	0	0	0	1	0	1	0	0	0	0	0	0	1	1	0	0	0	0	0	0	0	30319000
V1.UC32-0_GL0163299	Glucosidase	2	6	0	16	0	1	1	2	2	5	0	15	0	1	0	1	2	5	0	15	0	0	1	1	4977700	11538000	0	191210000	0	0	0	0		Type 1
sp|Q86UQ4|ABCAD_HUMAN;Q86UQ4	Other Human Protein	0	0	1	1	0	0	0	0	0	0	1	1	0	0	0	0	0	0	1	1	0	0	0	0	0	0	0	3879700	0	0	0	0
sp|Q86YH2|Z280B_HUMAN;Q86YH2	Other Human Protein	0	0	1	0	0	0	0	0	0	0	1	0	0	0	0	0	0	0	1	0	0	0	0	0	0	0	0	0	0	0	0	0
sp|Q8IVM0|CCD50_HUMAN;Q8IVM0	Other Human Protein	0	0	1	1	1	1	1	1	0	0	1	1	1	1	1	1	0	0	1	1	1	1	1	1	0	0	0	0	0	0	0	21663000
sp|Q8IZJ1|UNC5B_HUMAN;Q8IZJ1	Other Human Protein	1	1	1	1	1	1	1	1	1	1	1	1	1	1	1	1	1	1	1	1	1	1	1	1	0	0	0	0	0	0	0	16163000
sp|Q8N5N4|CC022_HUMAN;Q8N5N4	Other Human Protein	1	0	0	0	1	1	0	0	1	0	0	0	1	0	1	0	1	0	0	0	1	1	0	0	0	0	0	0	0	27227000	0	0
sp|Q8NA61|SPERT_HUMAN;Q8NA61	Other Human Protein	0	0	0	1	0	0	0	0	0	0	0	1	0	0	0	0	0	0	0	1	0	0	0	0	0	0	0	5048500	0	0	0	0
sp|Q8NCB2|CAMKV_HUMAN;Q8NCB2	Other Human Protein	0	0	0	1	0	0	0	0	0	0	0	1	0	0	0	0	0	0	0	1	0	0	0	0	0	0	0	1419300	0	0	0	0
sp|Q8NEM2|SHCBP_HUMAN;Q8NEM2	Other Human Protein	1	1	1	1	1	1	1	1	1	1	1	1	1	1	1	1	1	1	1	1	1	1	1	1	0	0	0	0	0	0	0	14156000
sp|Q8NF91|SYNE1_HUMAN;Q8NF91	Other Human Protein	0	0	0	1	0	0	0	0	0	0	0	1	0	0	0	0	0	0	0	1	0	0	0	0	0	0	0	0	0	0	0	0
sp|Q8NFJ5|RAI3_HUMAN;Q8NFJ5	Other Human Protein	1	1	1	1	1	1	0	0	1	1	1	1	1	0	1	0	1	1	1	1	1	1	0	0	0	0	0	0	0	27663000	0	0
sp|Q8TBZ5|ZN502_HUMAN;Q8TBZ5	Other Human Protein	0	1	0	2	1	1	0	1	0	1	0	2	1	0	1	1	0	1	0	2	1	1	0	1	0	0	0	4404700	0	0	0	0
sp|Q8TC59|PIWL2_HUMAN;Q8TC59	Other Human Protein	1	1	1	1	0	1	0	0	1	1	1	1	0	0	1	0	1	1	1	1	0	1	0	0	0	0	0	0	0	4230200	0	0
sp|Q8TCT0|CERK1_HUMAN;Q8TCT0	Other Human Protein	0	0	1	1	1	1	0	0	0	0	1	1	1	0	1	0	0	0	1	1	1	1	0	0	0	0	0	0	0	26053000	0	0
sp|Q8WTW3|COG1_HUMAN;Q8WTW3	Other Human Protein	1	1	1	0	1	1	1	0	1	1	1	0	1	1	1	0	1	1	1	0	1	1	1	0	0	0	0	0	0	115630000	0	0
sp|P98088|MUC5A_HUMAN;P98088	Other Human Protein	2	2	1	2	1	1	1	0	2	2	1	2	1	1	1	0	2	2	1	2	1	1	1	0	15476000	11518000	0	2409200	0	0	0	0
sp|Q02413|DSG1_HUMAN;Q02413	Other Human Protein	3	2	2	3	2	0	3	1	3	2	2	3	2	3	0	1	3	2	2	3	2	0	3	1	6391800	11443000	5776500	7722400	4756200	0	10686000	0
sp|Q8WZA0|LZIC_HUMAN;Q8WZA0	Other Human Protein	0	0	0	1	1	0	1	1	0	0	0	1	1	1	0	1	0	0	0	1	1	0	1	1	0	0	0	0	0	0	0	3119000
sp|Q969Q4|ARL11_HUMAN;Q969Q4	Other Human Protein	0	0	0	1	0	0	0	0	0	0	0	1	0	0	0	0	0	0	0	1	0	0	0	0	0	0	0	0	0	0	0	0
sp|Q969X1|LFG3_HUMAN;Q969X1	Other Human Protein	1	1	0	1	0	0	0	0	1	1	0	1	0	0	0	0	1	1	0	1	0	0	0	0	0	0	0	3475900	0	0	0	0
sp|Q96BY6|DOC10_HUMAN;Q96BY6	Other Human Protein	1	0	0	1	0	0	2	1	1	0	0	1	0	2	0	1	1	0	0	1	0	0	2	1	0	0	0	0	0	0	5440100	0
sp|Q96QA5|GSDMA_HUMAN;Q96QA5	Other Human Protein	0	1	0	1	0	0	1	0	0	1	0	1	0	1	0	0	0	1	0	1	0	0	1	0	0	0	0	0	0	0	4442300	0
sp|Q96ST2|IWS1_HUMAN;Q96ST2	Other Human Protein	0	1	1	1	1	1	1	1	0	1	1	1	1	1	1	1	0	1	1	1	1	1	1	1	0	0	0	0	0	0	0	1797600
sp|Q99102|MUC4_HUMAN;Q99102	Other Human Protein	0	1	1	2	0	0	0	0	0	1	1	2	0	0	0	0	0	1	1	2	0	0	0	0	0	0	0	10477000	0	0	0	0
sp|Q99459|CDC5L_HUMAN;Q99459	Other Human Protein	1	1	1	1	1	1	1	2	1	1	1	1	1	1	1	2	1	1	1	1	1	1	1	2	0	0	0	0	0	0	0	33513000
sp|Q99832|TCPH_HUMAN;Q99832	Other Human Protein	1	1	1	1	1	1	1	1	1	1	1	1	1	1	1	1	1	1	1	1	1	1	1	1	0	0	0	0	0	0	0	88560000
V1.UC38-0_GL0013064	Bacterial Non-GH Protein	1	2	2	1	0	0	1	1	1	2	2	1	0	1	0	1	1	2	2	1	0	0	1	1	0	11122000	0	0	0	0	0	0
sp|Q9BT23|LIMD2_HUMAN;Q9BT23	Other Human Protein	0	1	0	1	0	0	0	0	0	1	0	1	0	0	0	0	0	1	0	1	0	0	0	0	0	0	0	5010600	0	0	0	0
MH0003_GL0070364	Bacterial Non-GH Protein	3	2	0	0	0	0	0	0	3	2	0	0	0	0	0	0	3	2	0	0	0	0	0	0	20045000	11031000	0	0	0	0	0	0
sp|Q9BYF1|ACE2_HUMAN;Q9BYF1	Other Human Protein	1	1	0	0	1	0	0	0	1	1	0	0	1	0	0	0	1	1	0	0	1	0	0	0	0	0	0	0	1190000	0	0	0
MH0391_GL0115705	Glucuronidase	0	3	0	6	1	1	0	1	0	2	0	5	1	0	0	0	0	2	0	2	1	0	0	0	0	10959000	0	157570000	0	0	0	0	No loop
sp|Q9GZT5|WN10A_HUMAN;Q9GZT5	Other Human Protein	0	0	0	0	0	0	1	1	0	0	0	0	0	1	0	1	0	0	0	0	0	0	1	1	0	0	0	0	0	0	0	8376800
sp|Q9H079|KTBL1_HUMAN;Q9H079	Other Human Protein	0	1	0	0	1	0	0	0	0	1	0	0	1	0	0	0	0	1	0	0	1	0	0	0	0	0	0	0	721020	0	0	0
SZEY-40A_GL0042419	Bacterial Non-GH Protein	1	1	0	0	0	0	0	0	1	1	0	0	0	0	0	0	1	1	0	0	0	0	0	0	0	10824000	0	0	0	0	0	0
sp|Q9H227|GBA3_HUMAN;Q9H227	Other Human Protein	0	0	0	1	0	1	0	0	0	0	0	1	0	0	1	0	0	0	0	1	0	1	0	0	0	0	0	0	0	142360000	0	0
MH0287_GL0110830	Bacterial Non-GH Protein	8	7	8	8	1	2	6	6	2	3	3	3	0	0	0	0	0	1	1	1	0	0	0	0	22831000	10725000	37769000	36724000	0	0	0	0
sp|Q9H5I1|SUV92_HUMAN;Q9H5I1	Other Human Protein	1	1	1	1	1	1	1	1	1	1	1	1	1	1	1	1	1	1	1	1	1	1	1	1	0	0	0	0	0	0	0	61086000
sp|Q9H8L6|MMRN2_HUMAN;Q9H8L6	Other Human Protein	1	1	1	1	1	1	1	1	1	1	1	1	1	1	1	1	1	1	1	1	1	1	1	1	0	0	0	0	0	0	0	158310000
sp|Q9HAT2|SIAE_HUMAN;Q9HAT2	Other Human Protein	0	1	1	0	0	0	0	1	0	1	1	0	0	0	0	1	0	1	1	0	0	0	0	1	0	0	0	0	0	0	0	3525100
sp|Q9HBB8|CDHR5_HUMAN;Q9HBB8	Other Human Protein	0	1	0	1	1	1	1	0	0	1	0	1	1	1	1	0	0	1	0	1	1	1	1	0	0	0	0	0	0	21347000	0	0
sp|Q9HC84|MUC5B_HUMAN;Q9HC84	Other Human Protein	0	0	1	1	0	0	0	0	0	0	1	1	0	0	0	0	0	0	1	1	0	0	0	0	0	0	0	756510	0	0	0	0
sp|Q9HCC0|MCCB_HUMAN;Q9HCC0	Other Human Protein	0	0	0	0	2	1	0	1	0	0	0	0	2	0	1	1	0	0	0	0	2	1	0	1	0	0	0	0	15589000	0	0	0
sp|Q9HCY8|S10AE_HUMAN;Q9HCY8	Other Human Protein	1	1	0	0	0	0	1	0	1	1	0	0	0	1	0	0	1	1	0	0	0	0	1	0	0	0	0	0	0	0	998500	0
sp|Q9NQA3|WASH6_HUMAN;Q9NQA3	Other Human Protein	0	1	1	1	0	0	1	1	0	1	1	1	0	1	0	1	0	1	1	1	0	0	1	1	0	0	0	0	0	0	0	3127300
sp|Q9NQW6|ANLN_HUMAN;Q9NQW6	Other Human Protein	1	1	1	1	1	1	1	1	1	1	1	1	1	1	1	1	1	1	1	1	1	1	1	1	0	0	0	0	0	0	0	1184000
sp|Q9NR71|ASAH2_HUMAN;Q9NR71	Other Human Protein	0	0	0	1	2	3	0	1	0	0	0	1	2	0	3	1	0	0	0	1	2	3	0	1	0	0	0	0	0	20244000	0	0
sp|P08779|K1C16_HUMAN;CON__P08779;P08779;CON__A2A4G1;CON__Q9Z2K1;CON__Q3ZAW8;CON__P19001;sp|P35900|K1C20_HUMAN;CON__P35900;CON__Q9D312;P35900	Contaminant - Keratin	10	14	9	15	9	4	12	8	3	5	2	7	3	5	0	3	3	4	2	6	3	0	5	3	12021000	10666000	7632300	45881000	14516000	0	10434000	6873200
sp|Q9NWL6|ASND1_HUMAN;Q9NWL6	Other Human Protein	0	0	0	1	0	0	0	0	0	0	0	1	0	0	0	0	0	0	0	1	0	0	0	0	0	0	0	0	0	0	0	0
MH0086_GL0013198;V1.CD24-0_GL0043029;V1.UC33-0_GL0033868;T2D-15A_GL0051225;MH0148_GL0077509;O2.UC28-2_GL0177333;T2D-19A_GL0078228;MH0409_GL0178324;MH0096_GL0048643	Bacterial Non-GH Protein	6	8	6	8	5	5	5	7	2	3	2	3	1	1	1	2	0	0	0	0	0	0	0	0	19464000	10573000	7294300	10772000	0	0	0	10972000
sp|Q9NZT1|CALL5_HUMAN;Q9NZT1	Other Human Protein	1	0	1	0	0	0	0	0	1	0	1	0	0	0	0	0	1	0	1	0	0	0	0	0	0	0	2023100	0	0	0	0	0
sp|Q9UGJ0|AAKG2_HUMAN;Q9UGJ0	Other Human Protein	0	0	0	1	1	1	0	0	0	0	0	1	1	0	1	0	0	0	0	1	1	1	0	0	0	0	0	0	0	10989000	0	0
T2D-52A_GL0011105	Bacterial Non-GH Protein	1	2	0	1	0	0	0	0	1	2	0	1	0	0	0	0	1	2	0	1	0	0	0	0	0	10563000	0	0	0	0	0	0
sp|Q9UKF2|ADA30_HUMAN;Q9UKF2	Other Human Protein	0	1	0	1	0	0	0	0	0	1	0	1	0	0	0	0	0	1	0	1	0	0	0	0	0	0	0	6151600	0	0	0	0
T2D-31A_GL0007216	Other Bacterial GH Protein	0	3	0	1	0	2	0	1	0	1	0	0	0	0	0	0	0	1	0	0	0	0	0	0	0	9747900	0	0	0	0	0	0
MH0133_GL0048584;V1.CD48-0_GL0092362;MH0211_GL0070016;SZEY-43A_GL0062620	Other Bacterial GH Protein	0	5	0	12	0	2	0	0	0	5	0	12	0	0	2	0	0	0	0	0	0	0	0	0	0	9746400	0	172710000	0	3478400	0	0
sp|Q9UL36|ZN236_HUMAN;Q9UL36	Other Human Protein	1	0	1	1	1	1	1	1	1	0	1	1	1	1	1	1	1	0	1	1	1	1	1	1	0	0	0	0	0	0	0	312420000
sp|Q9UM22|EPDR1_HUMAN;Q9UM22	Other Human Protein	0	1	0	0	1	1	1	1	0	1	0	0	1	1	1	1	0	1	0	0	1	1	1	1	0	0	0	0	0	0	0	3205200
sp|Q9UPS8|ANR26_HUMAN;Q9UPS8	Other Human Protein	1	0	0	0	0	0	0	1	1	0	0	0	0	0	0	1	1	0	0	0	0	0	0	1	0	0	0	0	0	0	0	67286000
sp|P19961|AMY2B_HUMAN;P19961;sp|P04745|AMY1_HUMAN;P04745;CON__Q3MHH8	Other Human Protein	15	13	12	13	13	16	15	15	2	2	1	2	1	2	2	2	2	2	1	2	1	2	2	2	11646000	9681500	0	7083500	0	13976000	47017000	48516000
sp|Q9Y272|RASD1_HUMAN;Q9Y272	Other Human Protein	0	0	0	0	0	0	1	0	0	0	0	0	0	1	0	0	0	0	0	0	0	0	1	0	0	0	0	0	0	0	1364800	0
sp|Q9Y646|CBPQ_HUMAN;Q9Y646	Other Human Protein	0	0	1	1	1	1	1	1	0	0	1	1	1	1	1	1	0	0	1	1	1	1	1	1	0	0	0	0	0	0	0	3305600
T2D-135A_GL0080150;V1.FI14_GL0082769;NOF013_GL0053113;V1.UC26-0_GL0104852;MH0113_GL0000024;O2.UC6-2_GL0074300;NOM023_GL0022955;V1.UC41-0_GL0011563;V1.UC57-0_GL0105144;O2.UC30-0_GL0031560	Bacterial Non-GH Protein	1	2	8	9	4	0	8	7	1	2	8	9	4	8	0	7	0	1	2	2	1	0	2	2	0	9643000	29412000	51798000	10483000	0	116990000	206110000
REV__MH0281_GL0109965;REV__MH0047_GL0040188;REV__MH0265_GL0130530	Bacterial Non-GH Protein	1	1	1	1	1	1	1	1	1	1	1	1	1	1	1	1	1	1	1	1	1	1	1	1	0	0	0	0	0	0	0	243280000
REV__MH0188_GL0096572;REV__V1.CD20-4_GL0011944;REV__MH0336_GL0102035	Bacterial Non-GH Protein	0	1	0	0	0	0	1	1	0	1	0	0	0	1	0	1	0	1	0	0	0	0	1	1	0	0	0	0	0	0	0	943010000
REV__sp|O60292|SI1L3_HUMAN;REV__O60292	Other Human Protein	0	0	0	0	0	1	0	1	0	0	0	0	0	0	1	1	0	0	0	0	0	1	0	1	0	0	0	0	0	0	0	6813600
REV__sp|O95613|PCNT_HUMAN;REV__O95613	Other Human Protein	0	0	0	1	0	1	2	2	0	0	0	1	0	2	1	2	0	0	0	1	0	1	2	2	0	0	0	0	0	0	0	12529000
REV__sp|P08922|ROS1_HUMAN;REV__P08922	Other Human Protein	1	1	1	1	1	1	1	1	1	1	1	1	1	1	1	1	1	1	1	1	1	1	1	1	0	0	0	0	0	0	0	5494000
REV__sp|Q15831|STK11_HUMAN;REV__Q15831	Other Human Protein	0	0	1	1	0	1	0	1	0	0	1	1	0	0	1	1	0	0	1	1	0	1	0	1	0	0	0	0	0	0	0	15698000
REV__sp|Q5VTT5|MYOM3_HUMAN;REV__Q5VTT5	Other Human Protein	1	1	1	1	0	1	0	1	1	1	1	1	0	0	1	1	1	1	1	1	0	1	0	1	0	0	0	0	0	0	0	16699000
REV__sp|Q6ZRR7|LRRC9_HUMAN;REV__Q6ZRR7	Other Human Protein	0	0	0	0	0	0	1	1	0	0	0	0	0	1	0	1	0	0	0	0	0	0	1	1	0	0	0	0	0	0	0	339390000
REV__sp|Q8IV77|CNGA4_HUMAN;REV__Q8IV77	Other Human Protein	0	0	1	0	0	0	0	0	0	0	1	0	0	0	0	0	0	0	1	0	0	0	0	0	0	0	53561000	0	0	0	0	0
REV__sp|Q8N3D4|EH1L1_HUMAN;REV__Q8N3D4	Other Human Protein	0	1	0	0	1	1	0	0	0	1	0	0	1	0	1	0	0	1	0	0	1	1	0	0	0	0	0	0	0	6161300	0	0
REV__sp|Q8TF72|SHRM3_HUMAN;REV__Q8TF72	Other Human Protein	0	0	0	0	0	1	0	0	0	0	0	0	0	0	1	0	0	0	0	0	0	1	0	0	0	0	0	0	0	3424500	0	0
REV__sp|Q8WY36|BBX_HUMAN;REV__Q8WY36	Other Human Protein	1	1	1	1	1	1	1	1	1	1	1	1	1	1	1	1	1	1	1	1	1	1	1	1	0	0	0	0	0	0	0	12920000
REV__sp|Q9BVV6|TALD3_HUMAN;REV__Q9BVV6	Other Human Protein	1	1	1	1	1	1	1	1	1	1	1	1	1	1	1	1	1	1	1	1	1	1	1	1	0	0	0	0	0	0	0	49468000
REV__sp|Q9C093|SPEF2_HUMAN;REV__Q9C093	Other Human Protein	0	0	0	0	1	1	0	0	0	0	0	0	1	0	1	0	0	0	0	0	1	1	0	0	0	0	0	0	0	8005500	0	0
REV__sp|Q9H4H8|FA83D_HUMAN;REV__Q9H4H8	Other Human Protein	0	0	1	1	1	1	1	0	0	0	1	1	1	1	1	0	0	0	1	1	1	1	1	0	0	0	0	0	0	3626600	0	0
REV__sp|Q9NR09|BIRC6_HUMAN;REV__Q9NR09	Other Human Protein	1	1	1	1	1	1	1	1	1	1	1	1	1	1	1	1	1	1	1	1	1	1	1	1	0	0	0	0	0	0	0	11760000
REV__sp|Q9UPT6|JIP3_HUMAN;REV__Q9UPT6	Other Human Protein	0	0	0	0	0	1	0	0	0	0	0	0	0	0	1	0	0	0	0	0	0	1	0	0	0	0	0	0	0	90873000	0	0
REV__sp|Q9Y617|SERC_HUMAN;REV__Q9Y617	Other Human Protein	0	1	1	1	0	0	0	1	0	1	1	1	0	0	0	1	0	1	1	1	0	0	0	1	0	0	0	0	0	0	0	8281800
REV__SZEY-75A_GL0064747	Bacterial Non-GH Protein	0	1	1	1	1	1	1	1	0	1	1	1	1	1	1	1	0	1	1	1	1	1	1	1	0	0	0	0	0	0	0	29714000
SZEY-08A_GL0007612	Bacterial Non-GH Protein	1	0	0	0	0	0	0	0	1	0	0	0	0	0	0	0	1	0	0	0	0	0	0	0	10986000	0	0	0	0	0	0	0
SZEY-20A_GL0010387	Bacterial Non-GH Protein	6	5	7	6	4	4	5	5	1	0	1	1	0	0	0	1	0	0	0	0	0	0	0	0	0	0	0	0	0	0	0	2048200
MH0003_GL0067009;MH0243_GL0075479;MH0376_GL0083842	Other Bacterial GH Protein	0	8	0	6	0	6	1	5	0	2	0	0	0	0	0	0	0	1	0	0	0	0	0	0	0	9601100	0	0	0	0	0	0
SZEY-35A_GL0096220;HT14A_GL0039769;V1.UC16-0_GL0033881;MH0370_GL0037202	Bacterial Non-GH Protein	4	5	3	5	4	4	2	3	1	1	0	1	0	0	0	0	1	1	0	1	0	0	0	0	0	0	0	2667000	0	0	0	0
V1.UC50-1_GL0095916	Bacterial Non-GH Protein	2	2	2	2	2	2	2	2	1	1	1	1	1	1	1	1	1	1	1	1	1	1	1	1	8062400	8693100	29232000	30523000	8713400	7990200	66315000	49098000
V1.FI04_GL0101556	Bacterial Non-GH Protein	3	5	5	6	5	5	1	3	1	1	0	0	0	0	0	0	0	0	0	0	0	0	0	0	0	8577600	0	0	0	0	0	0
sp|P08217|CEL2A_HUMAN;P08217;sp|P08218|CEL2B_HUMAN;P08218	Other Human Protein	5	3	11	12	12	10	12	12	5	3	11	12	12	12	10	12	5	3	11	12	12	10	12	12	8854700	8532700	815130000	1063900000	1822600000	1579700000	7409200000	5728600000
SZEY-63A_GL0003813	Bacterial Non-GH Protein	5	5	6	4	3	3	5	3	1	1	1	1	0	1	0	0	0	0	0	0	0	0	0	0	0	0	0	0	0	0	938910	0
sp|P09848|LPH_HUMAN;P09848	Other Human Protein	1	4	1	26	0	18	0	1	1	4	1	26	0	0	18	1	1	4	1	26	0	18	0	1	0	8424100	0	3028700000	0	1242800000	0	0
SZEY-69A_GL0010997;MH0047_GL0001473;V1.FI18_GL0099333;T2D-31A_GL0096139;MH0239_GL0027181;556261.HMPREF0240_02870;V1.UC50-1_GL0130439;V1.UC11-5_GL0090978;V1.UC35-4_GL0121113;V1.CD54-0_GL0097828	Bacterial Non-GH Protein	1	2	2	1	4	6	1	2	1	2	2	1	2	1	3	1	1	1	1	1	1	2	1	0	0	0	0	0	0	49339000	0	0
SZEY-69A_GL0028550;O2.UC41-1_GL0202814;V1.CD19-0_GL0080762	Glucosidase	0	2	0	3	0	2	0	2	0	0	0	1	0	0	0	0	0	0	0	1	0	0	0	0	0	0	0	60951000	0	0	0	0		Type 1
SZEY-97A_GL0046376;MH0425_GL0016728;NOM017_GL0008795;MH0109_GL0004385;V1.FI20_GL0229374	Bacterial Non-GH Protein	8	9	9	11	4	6	5	7	2	2	2	3	0	0	1	1	0	0	0	0	0	0	0	0	0	0	10796000	15715000	0	0	0	0
T2D-105A_GL0036280;V1.UC41-0_GL0023406;MH0158_GL0058425;MH0229_GL0033356;MH0110_GL0001551;MH0002_GL0048139;MH0452_GL0254837;O2.UC2-1_GL0202072;MH0147_GL0142827;MH0037_GL0027498;MH0187_GL0131215;MH0261_GL0021855;O2.UC16-1_GL0112928;MH0006_GL0214361;MH0161_GL0097744;MH0298_GL0129652;MH0057_GL0036438;N009A_GL0098394;O2.UC24-2_GL0022614	Bacterial Non-GH Protein	3	2	2	3	2	2	3	3	0	0	0	1	0	1	0	1	0	0	0	0	0	0	0	0	0	0	0	0	0	0	0	11342000
T2D-105A_GL0039911	Glucosidase	0	0	0	1	0	0	0	0	0	0	0	1	0	0	0	0	0	0	0	1	0	0	0	0	0	0	0	13005000	0	0	0	0		Type 2
T2D-10A_GL0028958	Bacterial Non-GH Protein	12	14	16	18	13	14	16	15	1	1	1	2	1	1	2	1	0	0	0	0	0	0	0	0	0	0	0	44836000	0	22179000	0	0
T2D-114A_GL0058513;MH0239_GL0172157;O2.UC11-2_GL0032987;V1.CD27-0_GL0073723;MH0333_GL0105811;MH0345_GL0135304;MH0419_GL0168147	Bacterial Non-GH Protein	5	6	4	3	5	5	6	5	0	1	0	0	1	1	1	1	0	0	0	0	0	0	0	0	0	0	0	0	0	0	0	3907600
T2D-122A_GL0083900	Other Bacterial GH Protein	0	6	0	6	0	2	0	2	0	1	0	1	0	0	0	0	0	1	0	1	0	0	0	0	0	0	0	7605500	0	0	0	0
MH0008_GL0015184;V1.CD31-0_GL0009828;MH0148_GL0094483;MH0004_GL0013801	Other Bacterial GH Protein	0	3	1	7	0	1	1	7	0	3	1	7	0	1	1	7	0	3	1	7	0	1	1	7	0	8236200	0	27364000	0	0	0	49525000
T2D-133A_GL0127125	Glucosidase	1	13	0	10	0	10	0	14	0	2	0	2	0	0	2	3	0	2	0	2	0	2	0	2	0	0	0	0	0	0	0	407770000		Type 2
T2D-135A_GL0000623	Bacterial Non-GH Protein	8	14	16	18	14	13	17	16	0	0	0	1	0	1	0	1	0	0	0	0	0	0	0	0	0	0	0	0	0	0	0	10012000
V1.CD35-1_GL0084448	Glucuronidase	0	3	2	3	1	3	0	5	0	0	0	0	0	0	0	1	0	0	0	0	0	0	0	1	0	0	0	0	0	0	0	1926500	Loop 1
T2D-135A_GL0049994	Bacterial Non-GH Protein	5	3	5	8	1	1	6	7	1	1	1	1	0	1	0	1	1	1	1	1	0	0	1	1	0	0	0	0	0	0	0	14612000
T2D-135A_GL0061722	Bacterial Non-GH Protein	4	5	8	8	5	7	9	9	1	0	1	1	1	2	1	2	0	0	0	0	0	0	0	0	0	0	0	0	0	0	62061000	46612000
sp|P14410|SUIS_HUMAN;P14410	Other Human Protein	1	4	8	10	8	11	0	5	1	3	7	9	7	0	10	4	1	3	7	9	7	10	0	4	0	8223000	9397200	46911000	19274000	114770000	0	8757600
T2D-78A_GL0086443;HT14A_GL0027399;V1.FI22_GL0047322;V1.CD48-0_GL0041516;T2D-62A_GL0011424;T2D-25A_GL0104232;V1.UC55-0_GL0038484;DLM020_GL0028126;V1.CD37-4_GL0070253;V1.UC38-4_GL0074670;MH0274_GL0112843;V1.CD18-0_GL0078902;MH0239_GL0009077;MH0203_GL0152652;DLM023_GL0003331;V1.FI34_GL0142160;V1.FI10_GL0117004;N031A_GL0006475;MH0333_GL0090345;N087A_GL0100474;V1.UC38-4_GL0049078;T2D-62A_GL0010838;V1.…	Bacterial Non-GH Protein	7	6	1	0	1	1	6	4	2	2	0	0	0	1	0	2	0	0	0	0	0	0	0	0	20694000	8138000	0	0	0	0	0	6017900
MH0092_GL0088682;SZEY-69A_GL0078143;O2.UC50-0_GL0038796	Bacterial Non-GH Protein	2	2	0	2	0	1	0	0	2	2	0	2	0	0	1	0	2	2	0	2	0	1	0	0	28934000	8022600	0	7128000	0	0	0	0
sp|Q9BYK8|HELZ2_HUMAN;Q9BYK8	Other Human Protein	1	1	0	0	0	0	0	0	1	1	0	0	0	0	0	0	1	1	0	0	0	0	0	0	0	7888400	0	0	0	0	0	0
658655.HMPREF0988_00672	Glucuronidase	0	3	0	1	0	7	0	10	0	2	0	0	0	0	6	9	0	2	0	0	0	6	0	9	0	7848600	0	0	0	67557000	0	219450000	No loop
sp|Q16820|MEP1B_HUMAN;Q16820	Other Human Protein	0	2	0	2	4	4	0	2	0	2	0	2	4	0	4	2	0	2	0	2	4	4	0	2	0	7723500	0	7524800	24418000	169530000	0	4976700
T2D-20A_GL0056441	Bacterial Non-GH Protein	5	4	9	10	9	10	6	7	0	0	0	0	1	0	1	0	0	0	0	0	0	0	0	0	0	0	0	0	0	37561000	0	0
MH0088_GL0001694;V1.CD7-4_GL0016958;T2D-62A_GL0032122;MH0014_GL0025066;MH0239_GL0125278;T2D-107A_GL0032354;V1.UC11-5_GL0080990;O2.UC11-1_GL0008238;O2.CD3-0-PT_GL0071884;MH0386_GL0194183;N037A_GL0117753;MH0376_GL0044346;O2.CD3-0-PT_GL0185168;O2.UC46-0_GL0030771;O2.UC44-0_GL0042493;V1.UC11-5_GL0118740;T2D-175A_GL0048413;T2D-157A_GL0036037;V1.CD1-0-PT_GL0136741;MH0370_GL0086412;O2.UC30-1_GL0064947;M…	Bacterial Non-GH Protein	9	10	10	11	10	10	9	8	2	2	2	2	2	1	2	1	0	0	0	0	0	0	0	0	7301500	7700800	18041000	47217000	8359300	7442700	0	0
T2D-149A_GL0080202	Bacterial Non-GH Protein	2	2	0	0	2	2	0	0	2	2	0	0	2	0	2	0	2	2	0	0	2	2	0	0	18966000	7022600	0	0	43558000	37893000	0	0
T2D-31A_GL0034203	Bacterial Non-GH Protein	5	3	4	5	5	4	4	4	1	1	1	1	1	0	1	1	1	1	1	1	1	1	0	1	0	0	0	0	0	0	0	4419600
T2D-33A_GL0112173;V1.UC47-4_GL0191403;O2.UC12-1_GL0094786;MH0087_GL0045899;MH0044_GL0008017;V1.UC16-0_GL0064498;MH0077_GL0039414;MH0385_GL0137898;MH0372_GL0115863;MH0246_GL0112485;MH0200_GL0048026;MH0143_GL0070795;O2.UC36-0_GL0039324;MH0301_GL0091239;MH0003_GL0086746;O2.UC21-1_GL0082901;MH0109_GL0027346;MH0044_GL0007474;O2.CD1-0_GL0114022;V1.FI27_GL0086569;MH0090_GL0058066;MH0387_GL0112903;O2.UC1…	Bacterial Non-GH Protein	6	5	6	5	2	3	4	4	1	1	1	0	1	1	1	1	0	0	0	0	0	0	0	0	0	0	0	0	0	0	0	3307700
T2D-47A_GL0080425	Bacterial Non-GH Protein	4	5	11	10	8	10	9	9	0	0	1	0	0	0	0	0	0	0	1	0	0	0	0	0	0	0	1767900	0	0	0	0	0
T2D-47A_GL0127517	Bacterial Non-GH Protein	2	2	3	3	4	3	4	4	0	1	0	1	1	1	0	1	0	1	0	1	1	0	1	1	0	0	0	0	0	0	0	3762700
MH0447_GL0197161	Bacterial Non-GH Protein	1	1	0	0	0	0	1	1	1	1	0	0	0	1	0	1	1	1	0	0	0	0	1	1	17356000	7006900	0	0	0	0	6379000	6660200
MH0088_GL0019768;V1.FI18_GL0059163	Glucuronidase	0	2	1	4	0	2	0	5	0	0	0	0	0	0	0	2	0	0	0	0	0	0	0	2	0	0	0	0	0	0	0	11531000	Mini-Loop 1
T2D-62A_GL0007617;MH0088_GL0119524;MH0088_GL0069736;MH0212_GL0092579;V1.UC16-0_GL0048319;V1.UC55-0_GL0182354;V1.UC16-0_GL0002083;V1.CD7-4_GL0006980;T2D-31A_GL0032634;553973.CLOHYLEM_04402;V1.CD30-0_GL0073435;O2.UC18-0_GL0027190;V1.CD7-4_GL0095231;V1.CD3-0-PN_GL0023407;T2D-31A_GL0040600;556261.HMPREF0240_04436	Bacterial Non-GH Protein	6	6	7	8	8	8	7	7	1	0	1	1	1	0	1	0	0	0	0	0	0	0	0	0	0	0	0	0	0	2045700	0	0
T2D-62A_GL0031792	Bacterial Non-GH Protein	1	1	2	2	1	1	1	1	0	0	1	1	0	0	0	0	0	0	1	1	0	0	0	0	0	0	0	23705000	0	0	0	0
DLM013_GL0037599	Bacterial Non-GH Protein	1	2	0	0	0	0	0	0	1	2	0	0	0	0	0	0	1	2	0	0	0	0	0	0	0	6965000	0	0	0	0	0	0
sp|P17931|LEG3_HUMAN;P17931	Other Human Protein	1	2	1	2	0	2	2	2	1	2	1	2	0	2	2	2	1	2	1	2	0	2	2	2	0	6711700	0	22147000	0	6894000	5845000	5067700
MH0384_GL0042433;T2D-135A_GL0101877;MH0329_GL0082609	Bacterial Non-GH Protein	3	3	4	6	2	4	6	4	3	3	4	6	2	6	4	4	1	2	3	3	1	2	3	2	7275300	6454200	45692000	43101000	0	6413000	135700000	76661000
T2D-70A_GL0095343;MH0088_GL0074338;MH0026_GL0035301;MH0364_GL0101039;MH0373_GL0119236;ED10A_GL0060377;V1.UC11-5_GL0195778	Bacterial Non-GH Protein	3	3	4	3	1	1	5	5	1	1	1	1	0	2	0	2	1	1	1	1	0	0	1	1	0	0	0	0	0	0	10684000	12766000
T2D-83A_GL0003047	Glucosidase	0	2	0	2	0	5	0	2	0	0	0	0	0	0	2	0	0	0	0	0	0	1	0	0	0	0	0	0	0	14796000	0	0		Type 1
T2D-8A_GL0009884	Glucosidase	0	1	0	1	0	1	0	1	0	1	0	1	0	0	1	1	0	1	0	1	0	1	0	1	0	0	0	0	0	0	0	3199600		Type 2
O2.UC34-2_GL0026631	Glucuronidase	0	0	0	6	0	0	0	5	0	0	0	1	0	0	0	1	0	0	0	1	0	0	0	1	0	0	0	0	0	0	0	14277000	Mini-Loop 1
sp|P55259|GP2_HUMAN;P55259	Other Human Protein	2	2	6	6	8	6	1	0	2	2	6	6	8	1	6	0	2	2	6	6	8	6	1	0	6774700	6421900	17375000	37563000	243230000	92157000	0	0
V1.CD2-0-PT_GL0021898;V1.UC33-0_GL0171694;MH0456_GL0135531;SZEY-106A_GL0059138;NLF012_GL0003974;T2D-54A_GL0024654;NOM014_GL0005150;O2.UC2-1_GL0107106;T2D-135A_GL0112502;MH0287_GL0100558;MH0233_GL0012139;MH0199_GL0088798;MH0187_GL0131453;DLM028_GL0003028;MH0389_GL0092072;MH0377_GL0164804	Bacterial Non-GH Protein	5	5	3	3	4	4	0	2	1	1	0	0	0	0	0	0	0	0	0	0	0	0	0	0	0	6398400	0	0	0	0	0	0
V1.CD15-3_GL0155371	Bacterial Non-GH Protein	2	2	1	1	2	2	1	1	1	1	0	0	1	0	1	0	1	1	0	0	1	1	0	0	0	0	0	0	0	18314000	0	0
MH0335_GL0024470	Glucuronidase	0	15	0	7	0	13	0	9	0	0	0	0	0	0	0	1	0	0	0	0	0	0	0	1	0	0	0	0	0	0	0	1278400	No loop
MH0429_GL0112322;V1.CD55-0_GL0259229;MH0204_GL0202700	Glucuronidase	0	2	0	8	0	2	0	5	0	0	0	2	0	0	0	0	0	0	0	2	0	0	0	0	0	0	0	46324000	0	0	0	0	No loop
sp|P14923|PLAK_HUMAN;P14923	Other Human Protein	2	2	1	0	1	0	1	1	2	2	1	0	1	1	0	1	2	2	1	0	1	0	1	1	9383300	6268000	0	0	0	0	0	0
V1.CD21-4_GL0047051	Bacterial Non-GH Protein	2	1	1	1	0	1	1	2	1	1	0	0	0	1	0	1	1	1	0	0	0	0	1	1	0	0	0	0	0	0	0	4816100
sp|Q8N1N4|K2C78_HUMAN;CON__Q8N1N4-2;CON__Q7RTT2;Q8N1N4	Contaminant - Keratin	1	3	0	3	3	0	4	1	0	2	0	1	1	3	0	0	0	2	0	1	1	0	3	0	0	6252400	0	0	0	0	5871400	0
sp|P50443|S26A2_HUMAN;P50443	Other Human Protein	2	2	2	2	0	1	0	0	2	2	2	2	0	0	1	0	2	2	2	2	0	1	0	0	6227600	6122600	0	6514000	0	0	0	0
sp|Q7Z794|K2C1B_HUMAN;CON__Q7Z794;Q7Z794	Contaminant - Keratin	6	6	2	4	2	2	7	3	2	2	0	1	0	3	0	0	2	2	0	1	0	0	3	0	4959700	5885500	0	0	0	0	12563000	0
SZEY-35A_GL0032588	Bacterial Non-GH Protein	1	1	0	0	0	0	0	0	1	1	0	0	0	0	0	0	1	1	0	0	0	0	0	0	0	5844300	0	0	0	0	0	0
V1.CD3-3-PN_GL0026126	Bacterial Non-GH Protein	4	4	8	10	4	6	10	9	0	0	0	1	0	1	0	1	0	0	0	0	0	0	0	0	0	0	0	0	0	0	0	20945000
O2.CD1-0-PT_GL0121749;MH0196_GL0174200;V1.FI05_GL0058233;MH0292_GL0031056;V1.UC50-1_GL0141476;MH0125_GL0045164;O2.UC17-2_GL0051574;MH0233_GL0050018;MH0404_GL0118236;SZEY-41A_GL0041503;V1.CD21-4_GL0034029;MH0314_GL0010631;O2.CD3-0-PT_GL0138593;V1.FI34_GL0046440;V1.FI03_GL0022771;V1.CD3-0-PN_GL0064868;V1.CD3-0-PN_GL0031514;V1.CD1-3-PN_GL0079059;V1.CD12-3_GL0009939;O2.UC48-0_GL0229333;O2.UC41-1_GL00…	Bacterial Non-GH Protein	1	2	1	2	1	1	1	1	1	2	1	2	1	1	1	1	1	2	1	2	1	1	1	1	0	5411700	0	0	0	0	0	0
V1.CD3-3-PN_GL0069790	Bacterial Non-GH Protein	9	7	10	11	9	8	11	10	0	0	0	1	1	0	0	0	0	0	0	1	1	0	0	0	0	0	0	0	1793000	0	0	0
O2.UC19-2_GL0029853	Glucuronidase	0	16	0	8	0	14	0	10	0	0	0	0	0	0	0	1	0	0	0	0	0	0	0	1	0	0	0	0	0	0	0	7026900	No loop
V1.CD38-0_GL0093423	Glucosidase	0	13	0	15	0	2	0	15	0	1	0	1	0	0	0	1	0	0	0	0	0	0	0	0	0	0	0	0	0	0	0	10595000		Type 2
V1.CD38-0_GL0162235	Glucosidase	1	6	1	8	1	2	1	8	0	1	0	2	0	0	0	2	0	0	0	1	0	0	0	1	0	0	0	32998000	0	0	0	30652000		Type 2
sp|P48741|HSP77_HUMAN;sp|P17066|HSP76_HUMAN;P48741;P17066;sp|P54652|HSP72_HUMAN;sp|P34931|HS71L_HUMAN;sp|P0DMV9|HS71B_HUMAN;sp|P0DMV8|HS71A_HUMAN;sp|P11142|HSP7C_HUMAN;P54652;P34931;P0DMV9;P0DMV8;P11142	Other Human Protein	0	2	0	1	0	0	2	0	0	2	0	1	0	2	0	0	0	2	0	1	0	0	2	0	0	5395000	0	0	0	0	10689000	0
sp|P06733|ENOA_HUMAN;P06733	Other Human Protein	1	1	0	0	0	0	0	0	1	1	0	0	0	0	0	0	1	1	0	0	0	0	0	0	0	5368100	0	0	0	0	0	0
V1.CD42-0_GL0050238	Glucosidase	0	8	0	16	0	16	0	2	0	1	0	1	0	0	2	0	0	1	0	0	0	1	0	0	0	0	0	0	0	32275000	0	0		Type 1
V1.CD46-0_GL0004405	Bacterial Non-GH Protein	5	6	5	6	4	5	5	4	0	1	0	1	0	0	1	0	0	1	0	1	0	1	0	0	0	0	0	0	0	3013900	0	0
V1.CD52-0_GL0034091;O2.UC2-1_GL0113135	Bacterial Non-GH Protein	1	0	1	1	0	0	9	12	1	0	1	1	0	9	0	12	1	0	1	1	0	0	9	12	0	0	0	0	0	0	71881000	153950000
V1.CD52-0_GL0057719	Glucosidase	0	0	0	6	0	1	0	0	0	0	0	6	0	0	1	0	0	0	0	5	0	1	0	0	0	0	0	64851000	0	0	0	0		Type 2
MH0198_GL0204625;DOM022_GL0039484;DOF010_GL0043879	Glucuronidase	0	4	0	1	0	20	0	3	0	4	0	1	0	0	20	3	0	3	0	1	0	11	0	1	0	5272700	0	0	0	5110100000	0	729570	No loop
V1.CD8-0-PN_GL0136266	Bacterial Non-GH Protein	0	0	0	0	5	7	0	1	0	0	0	0	5	0	7	1	0	0	0	0	3	4	0	0	0	0	0	0	400440000	375000000	0	0
V1.CD3-0-PN_GL0034196;553973.CLOHYLEM_06529;O2.UC48-0_GL0163238;MH0370_GL0126613;V1.UC53-0_GL0108501	Bacterial Non-GH Protein	0	2	0	1	0	0	1	1	0	2	0	1	0	1	0	1	0	1	0	0	0	0	1	1	0	5234100	0	0	0	0	0	0
V1.CD7-0_GL0072707	Glucuronidase	0	1	0	5	0	1	0	1	0	0	0	1	0	0	0	0	0	0	0	1	0	0	0	0	0	0	0	14744000	0	0	0	0	No loop
V1.FI08_GL0153428	Bacterial Non-GH Protein	0	0	5	6	0	0	0	0	0	0	5	6	0	0	0	0	0	0	5	6	0	0	0	0	0	0	86827000	70094000	0	0	0	0
V1.CD3-0-PN_GL0131493;MH0188_GL0035444;V1.FI18_GL0039856;V1.CD46-0_GL0138900;V1.CD12-3_GL0023619;MH0239_GL0092235;MH0147_GL0068962;MH0335_GL0019991;MH0006_GL0036640;V1.CD21-0_GL0031333	Bacterial Non-GH Protein	2	4	4	4	1	3	2	2	1	1	1	0	0	0	0	0	1	1	1	0	0	0	0	0	0	5202700	0	0	0	0	0	0
V1.FI14_GL0260789	Bacterial Non-GH Protein	1	1	1	1	1	1	1	2	0	0	0	0	0	0	0	1	0	0	0	0	0	0	0	1	0	0	0	0	0	0	0	0
sp|P27352|IF_HUMAN;P27352	Other Human Protein	1	1	2	1	2	2	2	2	1	1	2	1	2	2	2	2	1	1	2	1	2	2	2	2	3052800	4946200	19309000	9502200	131970000	152530000	39837000	9181300
V1.FI18_GL0096141	Bacterial Non-GH Protein	1	1	0	0	1	1	0	0	1	1	0	0	1	0	1	0	1	1	0	0	1	1	0	0	0	0	0	0	0	20216000	0	0
V1.FI18_GL0131907	Unknown	0	2	1	10	1	2	0	21	0	0	0	1	0	0	0	1	0	0	0	1	0	0	0	1	0	0	0	0	0	0	0	101530000
MH0058_GL0054761;MH0205_GL0171110;MH0206_GL0187639;MH0106_GL0020988;MH0409_GL0024621;DOM003_GL0003734;MH0093_GL0017802;MH0030_GL0025751	Bacterial Non-GH Protein	3	4	8	8	5	4	2	4	1	1	0	0	0	0	0	0	0	0	0	0	0	0	0	0	0	4745600	0	0	0	0	0	0
sp|Q6ZMW2|ZN782_HUMAN;Q6ZMW2	Other Human Protein	1	1	0	0	0	0	0	0	1	1	0	0	0	0	0	0	1	1	0	0	0	0	0	0	0	4704400	0	0	0	0	0	0
V1.FI29_GL0024622;445971.ANASTE_01224	Bacterial Non-GH Protein	1	1	0	1	1	1	1	1	1	1	0	1	1	1	1	1	0	0	0	0	1	1	1	1	0	0	0	0	0	0	0	14218000
MH0276_GL0236826	Bacterial Non-GH Protein	7	7	7	7	3	5	3	3	1	1	0	0	0	0	0	0	0	0	0	0	0	0	0	0	0	4322400	0	0	0	0	0	0
V1.UC52-1_GL0118734;V1.CD4-0_GL0001229	Bacterial Non-GH Protein	4	4	3	2	3	2	2	2	1	1	1	0	0	0	0	0	1	1	1	0	0	0	0	0	0	4188700	0	0	0	0	0	0
V1.FI36_GL0242800	Unknown	0	0	0	0	0	0	4	4	0	0	0	0	0	4	0	4	0	0	0	0	0	0	4	4	0	0	0	0	0	0	243290000	163830000
V1.UC13-3_GL0113722	Bacterial Non-GH Protein	4	5	5	5	6	5	7	6	0	0	0	0	0	1	0	0	0	0	0	0	0	0	1	0	0	0	0	0	0	0	0	0
V1.UC16-0_GL0007514	Bacterial Non-GH Protein	9	10	4	9	9	9	9	11	0	0	0	1	0	1	0	1	0	0	0	0	0	0	0	0	0	0	0	0	0	0	0	3865600
V1.UC39-0_GL0100620;V1.CD44-4_GL0004459	Bacterial Non-GH Protein	3	3	3	3	2	2	0	0	1	1	0	0	0	0	0	0	1	1	0	0	0	0	0	0	0	4183400	0	0	0	0	0	0
MH0012_GL0194952;T2D-70A_GL0001651;MH0443_GL0115057;MH0143_GL0144598	Bacterial Non-GH Protein	12	13	12	12	10	11	11	10	1	1	0	1	1	0	1	0	0	0	0	0	0	0	0	0	7023100	4051300	0	1443700	11630000	8875400	0	0
MH0004_GL0030427;N087A_GL0005083;MH0038_GL0047869;MH0016_GL0040547;V1.UC11-5_GL0144636;T2D-48A_GL0037437;T2D-26A_GL0106212;T2D-133A_GL0086724;N085A_GL0066070;MH0402_GL0120177;MH0101_GL0048331;MH0012_GL0155630;MH0404_GL0153907	Bacterial Non-GH Protein	2	3	2	3	0	0	3	3	2	3	2	3	0	3	0	3	0	1	0	1	0	0	1	1	2950100	4041800	4509200	5447300	0	0	18369000	19371000
MH0189_GL0062581;MH0012_GL0048412;MH0443_GL0060494;O2.UC43-1_GL0036516;DOM005_GL0006720;MH0116_GL0021099;T2D-34A_GL0136713;O2.UC28-1_GL0135574;N038A_GL0114767;MH0006_GL0159372;T2D-135A_GL0101289;MH0175_GL0096559;MH0066_GL0066701;MH0452_GL0163105;MH0384_GL0053962;DOM012_GL0049751;MH0441_GL0054237;MH0446_GL0238394	Glucosidase	1	6	0	5	0	5	0	6	0	2	0	1	0	0	1	2	0	2	0	1	0	1	0	2	0	3713200	0	0	0	0	0	3246300		Type 2
sp|P16444|DPEP1_HUMAN;P16444	Other Human Protein	0	2	1	1	1	1	2	2	0	2	1	1	1	2	1	2	0	2	1	1	1	1	2	2	0	3613700	0	0	0	0	6417600	30795000
V1.UC26-4_GL0094117;MH0433_GL0133508;BGI-33A_GL0067034	Bacterial Non-GH Protein	1	1	0	1	1	0	1	0	1	0	0	0	0	0	0	0	1	0	0	0	0	0	0	0	9441100	0	0	0	0	0	0	0
V1.UC27-0_GL0121164;MH0184_GL0069267	Bacterial Non-GH Protein	7	6	5	5	6	5	6	6	1	0	0	0	0	0	0	0	0	0	0	0	0	0	0	0	7928500	0	0	0	0	0	0	0
MH0414_GL0032921	Glucuronidase	0	4	5	10	3	23	2	10	0	4	5	10	3	2	23	10	0	0	0	0	1	4	0	0	0	3330400	2236500	2985200000	828850	18219000000	2207600	460170000	Loop 1
V1.UC33-0_GL0171120;MH0113_GL0110317;MH0039_GL0031050;T2D-109A_GL0055366;MH0011_GL0103693	Bacterial Non-GH Protein	7	7	2	4	0	3	3	5	1	1	0	1	0	0	0	0	0	0	0	0	0	0	0	0	0	0	0	2277700	0	0	0	0
V1.CD3-3-PN_GL0060385	Bacterial Non-GH Protein	0	1	0	0	0	0	0	0	0	1	0	0	0	0	0	0	0	1	0	0	0	0	0	0	0	3222600	0	0	0	0	0	0
T2D-135A_GL0002514;NOF013_GL0041078;MH0155_GL0029986;NLF014_GL0026553;MH0432_GL0010731;V1.UC57-0_GL0027480;O2.UC8-0_GL0109210;MH0435_GL0047034;MH0264_GL0066765;MH0113_GL0038422;MH0055_GL0029227;MH0003_GL0106963;O2.UC40-2_GL0119296;O2.UC1-1_GL0132059;O2.UC6-1_GL0032683	Bacterial Non-GH Protein	2	2	2	1	1	0	1	2	2	2	2	1	1	1	0	2	2	2	2	1	1	0	1	2	19005000	3010400	2639300	0	0	0	0	2978800
V1.UC41-0_GL0112837	Bacterial Non-GH Protein	8	9	12	13	10	9	14	13	0	0	0	0	0	1	0	1	0	0	0	0	0	0	0	0	0	0	0	0	0	0	0	9352400
sp|Q9NXJ0|M4A12_HUMAN;Q9NXJ0	Other Human Protein	1	1	0	0	0	0	0	0	1	1	0	0	0	0	0	0	1	1	0	0	0	0	0	0	0	3005300	0	0	0	0	0	0
CON__P12763	Contaminant - Other	0	2	0	0	0	0	3	1	0	2	0	0	0	3	0	1	0	2	0	0	0	0	3	1	0	2819200	0	0	0	0	31980000	0
N032A_GL0015347	Bacterial Non-GH Protein	12	12	0	0	0	0	4	3	0	1	0	0	0	0	0	0	0	1	0	0	0	0	0	0	0	2380100	0	0	0	0	0	0
V1.UC50-1_GL0077034	Bacterial Non-GH Protein	7	7	6	6	6	6	7	6	1	1	0	0	0	1	0	0	0	0	0	0	0	0	0	0	0	0	0	0	0	0	0	0
sp|P25815|S100P_HUMAN;P25815	Other Human Protein	1	1	0	0	0	0	0	0	1	1	0	0	0	0	0	0	1	1	0	0	0	0	0	0	0	1984100	0	0	0	0	0	0
V1.UC50-1_GL0128894	Bacterial Non-GH Protein	4	4	3	3	3	2	4	4	1	1	0	0	0	1	0	1	0	0	0	0	0	0	0	0	0	0	0	0	0	0	0	9675200
sp|P12273|PIP_HUMAN;P12273	Other Human Protein	1	2	1	2	2	1	2	1	1	2	1	2	2	2	1	1	1	2	1	2	2	1	2	1	0	1914800	0	14662000	1851500	0	2785600	0
MH0446_GL0208372;MH0080_GL0052041;MH0377_GL0055704;MH0431_GL0151095;MH0197_GL0026364	Bacterial Non-GH Protein	2	2	1	1	1	0	1	1	1	1	0	0	0	0	0	0	1	1	0	0	0	0	0	0	0	1846600	0	0	0	0	0	0
T2D-133A_GL0117650;DOM005_GL0014306	Glucosidase	1	12	0	12	0	3	0	13	0	1	0	0	0	0	0	0	0	1	0	0	0	0	0	0	0	1690300	0	0	0	0	0	0		Type 2
sp|Q5W0B7|TM236_HUMAN;Q5W0B7	Other Human Protein	0	1	1	0	0	0	0	0	0	1	1	0	0	0	0	0	0	1	1	0	0	0	0	0	0	834830	0	0	0	0	0	0
sp|P04632|CPNS1_HUMAN;P04632	Other Human Protein	0	1	0	0	0	0	0	0	0	1	0	0	0	0	0	0	0	1	0	0	0	0	0	0	0	715090	0	0	0	0	0	0
V1.UC9-0_GL0067169	Bacterial Non-GH Protein	1	2	2	2	3	3	2	3	0	0	0	0	1	0	1	1	0	0	0	0	1	1	0	1	0	0	0	0	0	0	0	906010

## Sheet: Female 1_Summed Intensities
Female 1
Protein Class	Biotin Only (LFQ Intensity)	% of Sum	Biotin-ABP (LFQ Intensity)	% of Sum
β-Glucosidase	294333500	0.0070134	60881382500	0.524536
β-Glucuronidase	163170000	0.00388803	10775582700	0.0928393
Other Bacterial GH Protein	6502700	0.000154947	7082357600	0.0610195
Bacterial Non-GH Protein	13641893000	0.32506	11518732900	0.099242
Other Human Proteins	26681531200	0.635769	24147885920	0.208051
Unknown	1179889000	0.0281145	1661159000	0.0143121
Total	41967319400		116067100620

## Sheet: Female 2_Summed Intensities
Female 2
Protein Class	Biotin Only (LFQ Intensity)	% of Sum	Biotin-ABP (LFQ Intensity)	% of Sum
β-Glucosidase	0	0	26383473200	0.244671
β-Glucuronidase	2236500	4.234e-05	11581433740	0.107402
Other Bacterial GH Protein	0	0	2283492300	0.0211763
Bacterial Non-GH Protein	15494773400	0.293337	17313795190	0.160562
Other Human Proteins	36993060500	0.70033	48603931350	0.450736
Unknown	332284000	0.00629059	1666251500	0.0154522
Total	52822354400		107832377280

## Sheet: Male 1_Summed Intensities
Male 1
Protein Class	Biotin Only (LFQ Intensity)	% of Sum	Biotin-ABP (LFQ Intensity)	% of Sum
β-Glucosidase	0	0	19561435000	0.185294
β-Glucuronidase	828850	1.74888e-05	31317968000	0.296657
Other Bacterial GH Protein	506980	1.06973e-05	2989238500	0.0283153
Bacterial Non-GH Protein	7484921210	0.157933	9117480300	0.0863646
Other Human Proteins	39853189280	0.840907	41688373430	0.39489
Unknown	53678000	0.00113261	895140000	0.00847914
Total	47393124320		105569635230

## Sheet: Male 2_Summed Intensities
Male 2
Protein Class	Biotin Only (LFQ Intensity)	% of Sum	Biotin-ABP (LFQ Intensity)	% of Sum
β-Glucosidase	0	0	27231006100	0.272403
β-Glucuronidase	2207600	4.52428e-05	5618290570	0.0562022
Other Bacterial GH Protein	4040500	8.28065e-05	2337949400	0.0233875
Bacterial Non-GH Protein	13316418370	0.272908	25415560170	0.254243
Other Human Proteins	33650517950	0.689638	35976723140	0.359891
Unknown	1821293000	0.0373258	3386199200	0.0338736
Total	48794477420		99965728580
